# Supplementary material for: Target Gene Analysis by Microarrays and Chromatin Immunoprecipitation Identifies HEY Proteins as Highly Redundant bHLH Repressors
Source: PLoS Genet. 2012 May 17;8(5):e1002728. doi: 10.1371/journal.pgen.1002728 (PMC3355086; doi:10.1371/journal.pgen.1002728)
Supplement: Table S4 — ChIPseq peaks for HEY2. Shown are the locations of all HEY2 ChIPseq peaks, by giving the start and the end point of each peak as well as the summit position (location with highest enrichment). tags = total number of reads attributed to peak; pvalue = given as −10*log10(pvalue); fold = fold enrichment; FDR = false discovery rate; height = peak height; TSS Distance = distance to closest transcription start site; given are also the location and orientation of the Gene with the closest TSS. (XLSX) [file pgen.1002728.s006.xlsx]

## Sheet: Tabelle1
chr	start	end	summit		tags	pvalue	fold	FDR	Height		TSS Distance	GeneStart	GeneEnd	Symbol	Strand
chr1	564441	568981	565115		540	171.47	6.64	0.06	46		56919	621096	622034	OR4F16	-
chr1	569055	570347	569420		177	114.38	5.32	0.16	36		52614	621096	622034	OR4F16	-
chr1	713989	714599	714455		39	329.56	30.72	0	11		-6865	721320	722513	AL669831.2	+
chr1	762958	763464	763205		39	172.9	13.39	0.07	15		41885	721320	722513	AL669831.2	+
chr1	805136	805495	805315		20	120.34	19.02	0.16	12		-54945	860260	874671	SAMD11	+
chr1	839679	840326	840165		70	418.09	20.92	0	22		-20095	860260	874671	SAMD11	+
chr1	855914	856210	856095		18	63.05	9.54	1.21	13		-4165	860260	874671	SAMD11	+
chr1	856231	856826	856500		44	193.99	15.65	0.03	14		-3760	860260	874671	SAMD11	+
chr1	858883	860592	859935		268	2534.89	53.15	0	32		-325	860260	874671	SAMD11	+
chr1	860603	861230	860710		65	464.86	35.94	0	25		-408	861118	879955	SAMD11	+
chr1	870410	870825	870625		20	120.34	29.3	0.16	16		-4030	874655	879639	SAMD11	+
chr1	870847	871691	871450		89	568.41	24.21	0	22		-3205	874655	879639	SAMD11	+
chr1	875581	876580	875770		195	1910.75	93.9	0	64		44	875726	877553	SAMD11	+
chr1	876962	878273	877340		315	3100	109.63	0	65		-206	877546	878272	SAMD11	+
chr1	901919	902760	902440		55	249.16	13.2	0	12		563	901877	910476	PLEKHN1	+
chr1	933453	933765	933655		18	108.14	16.41	0.17	11		1706	934350	935361	HES4	-
chr1	933894	935099	934690		119	610.59	32.57	0	35		671	934350	935361	HES4	-
chr1	935135	936460	936185		226	1801.3	49.88	0	45		-633	934342	935552	HES4	-
chr1	955449	956143	955645		69	509.33	27.53	0	18		142	955503	991492	AGRN	+
chr1	994910	995464	995185		27	115.66	12.21	0.16	10		7819	987366	991492	AGRN	+
chr1	999537	999873	999750		18	81.46	12.1	0.45	11		9937	1007126	1009687	AL390719.1	-
chr1	1014998	1015776	1015205		43	283	26.41	0	12		4247	1017526	1019452	C1orf159	-
chr1	1167368	1168279	1167760		120	1049.69	51.22	0	31		131	1167629	1170421	B3GALT6	+
chr1	1226443	1226983	1226840		26	107.52	14.03	0.18	11		3548	1229879	1230388	ACAP3	-
chr1	1227076	1227512	1227315		22	96.65	11.74	0.26	10		3073	1229879	1230388	ACAP3	-
chr1	1242688	1243901	1243395		189	1785.18	73.36	0	43		-185	1237236	1243210	ACAP3	-
chr1	1243910	1244204	1244010		20	108.83	17.61	0.17	14		19	1243991	1246408	PUSL1	+
chr1	1283014	1283659	1283445		31	124.12	14.31	0.15	12		890	1277150	1284335	DVL1	-
chr1	1284317	1285209	1284735		81	517.09	20.96	0	14		-5	1270656	1284730	DVL1	-
chr1	1284317	1285209	1285015		81	517.09	20.96	0	14		-285	1270656	1284730	DVL1	-
chr1	1290744	1291148	1290995		22	173	28.48	0.07	11		-103	1290463	1290892	MXRA8	-
chr1	1370654	1371393	1371145		66	353.45	16.63	0	16		94	1371051	1378262	VWA1	+
chr1	1406926	1407368	1407175		21	105.99	17.61	0.2	12		26	1407149	1431582	ATAD3B	+
chr1	1447406	1447766	1447530		18	138.53	28.48	0.12	11		-25	1447555	1470065	ATAD3A	+
chr1	1534770	1535597	1535155		150	1354.77	52.82	0	43		321	1533392	1535476	RP11-345P4.5	-
chr1	1550432	1550931	1550640		31	92.58	11.51	0.29	16		-161	1550801	1565990	MIB2	+
chr1	1560480	1560851	1560655		15	70.73	14.67	0.79	10		188	1560467	1561143	MIB2	+
chr1	1623748	1624620	1623995		80	418.17	26.9	0	28		172	1592940	1624167	RP11-345P4.4	-
chr1	1624790	1625054	1624985		18	125.22	18.34	0.15	10		-818	1592940	1624167	RP11-345P4.4	-
chr1	1677032	1677873	1677755		52	247.52	21	0	16		-324	1656853	1677431	SLC35E2	-
chr1	1677940	1678435	1678235		26	155.23	28.71	0.07	15		-804	1656853	1677431	SLC35E2	-
chr1	1709449	1710255	1709935		101	741.64	34.34	0	29		-77	1688210	1709858	NADK	-
chr1	1822189	1822812	1822490		67	389.53	15.56	0	17		-85	1756598	1822405	GNB1	-
chr1	1838446	1839295	1839085		62	372.9	46.95	0	32		-7181	1846266	1848733	CALML6	+
chr1	1840085	1840989	1840815		58	278.31	23.89	0	18		-5451	1846266	1848733	CALML6	+
chr1	1850199	1851507	1850640		152	1431.72	107.84	0	46		72	1849030	1850712	TMEM52	-
chr1	1950572	1950999	1950825		30	231.88	42.89	0.02	18		45	1950780	1962192	GABRD	+
chr1	1976256	1976657	1976405		31	231.79	24.77	0.02	14		-5504	1981909	2116834	PRKCZ	+
chr1	2064961	2065192	2065075		18	131.83	22.89	0.13	12		-2	2065077	2080363	PRKCZ	+
chr1	2120945	2121829	2121265		101	678.97	24.49	0	21		4282	2124864	2125547	C1orf86	-
chr1	2144091	2144426	2144285		19	121.64	18.62	0.16	10		-8964	2129502	2135321	C1orf86	-
chr1	2158476	2160119	2159485		167	1274.7	42.39	0	24		-649	2160134	2241558	SKI	+
chr1	2160187	2161168	2160775		78	336.11	16.43	0	19		641	2160134	2241558	SKI	+
chr1	2162276	2162834	2162470		33	90.63	8.44	0.32	12		-1448	2163918	2234477	SKI	+
chr1	2171522	2172112	2171880		46	278.9	22.11	0	17		-7555	2179435	2234815	SKI	+
chr1	2188710	2189078	2188895		25	158.57	22.74	0.06	14		9460	2179435	2234815	SKI	+
chr1	2343759	2344540	2344220		50	322.54	28.17	0	16		-210	2336258	2344010	PEX10	-
chr1	2460645	2461273	2460955		63	468.8	41.08	0	27		729	2460184	2461684	HES5	-
chr1	2461302	2461978	2461685		50	265.19	20.26	0	16		-1	2460184	2461684	HES5	-
chr1	2473044	2473476	2473205		20	110.88	18.62	0.16	11		-11521	2460184	2461684	HES5	-
chr1	2477720	2478544	2477845		84	612.31	53.12	0	34		-9233	2487078	2492153	TNFRSF14	+
chr1	2517621	2518077	2517845		23	106.28	17.61	0.2	14		-85	2517930	2521071	C1orf93	+
chr1	2518360	2518792	2518555		19	106.78	17.97	0.19	10		31	2518524	2520184	C1orf93	+
chr1	3370793	3371162	3370945		25	101.16	8.96	0.21	11		-45	3370990	3397677	ARHGEF16	+
chr1	3370793	3371162	3371005		25	101.16	8.96	0.21	11		15	3370990	3397677	ARHGEF16	+
chr1	3541474	3541809	3541585		24	158.57	22.18	0.06	15		-52	3541637	3546689	TPRG1L	+
chr1	3568615	3569558	3569155		67	364.42	17.61	0	14		71	3569084	3652765	TP73	+
chr1	3585249	3585807	3585535		116	1304.02	108.21	0	57		-16210	3551578	3569325	WDR8	-
chr1	3619052	3619352	3619260		17	50.16	6.62	2.23	10		12024	3607236	3649856	TP73	+
chr1	3692395	3692846	3692625		26	87.59	9.55	0.35	12		7986	3697854	3700611	LRRC47	-
chr1	6187652	6188121	6187825		28	143.87	15.09	0.1	11		777	6185594	6188602	CHD5	-
chr1	6239148	6240224	6239905		60	393.14	24.21	0	11		178	6165151	6240083	CHD5	-
chr1	6240278	6240528	6240365		19	74.27	11.78	0.57	15		-282	6165151	6240083	CHD5	-
chr1	6265726	6266581	6266060		56	192.51	11.72	0.04	14		-129	6266189	6267624	RNF207	+
chr1	6295677	6296274	6295935		48	319.12	24.94	0	16		65	6294505	6296000	ICMT	-
chr1	6305065	6305572	6305345		42	241.25	20.12	0	17		1093	6304252	6305638	HES3	+
chr1	6320745	6321619	6321155		105	777.87	30.18	0	22		-120	6307406	6321035	GPR153	-
chr1	6330193	6330444	6330305		13	85.78	17.61	0.38	10		-9270	6307406	6321035	GPR153	-
chr1	6336298	6336858	6336720		33	180.92	19.75	0.04	12		-15685	6307406	6321035	GPR153	-
chr1	6452890	6454095	6453365		104	806.19	46.95	0	24		56	6324333	6453421	ACOT7	-
chr1	6484668	6485168	6484870		32	132.55	15.65	0.13	15		22	6484848	6521004	ESPN	+
chr1	6500304	6500552	6500445		25	217.99	31.69	0.03	17		7	6500438	6505817	ESPN	+
chr1	6508664	6509039	6508845		40	335.39	39.72	0	24		0	6508845	6521004	ESPN	+
chr1	6557413	6557914	6557635		33	253.43	30.81	0	14		-185	6527182	6557450	PLEKHG5	-
chr1	6661791	6663421	6663105		353	3100	64.61	0	53		-176	6650784	6662929	KLHL21	-
chr1	6673041	6674466	6673880		92	486.92	25.11	0	18		135	6673745	6684093	PHF13	+
chr1	6844545	6845143	6844835		49	308.1	23.73	0	18		-549	6845384	7829764	CAMTA1	+
chr1	6845375	6845715	6845535		24	207.37	41.57	0.03	17		-5	6845540	6932098	CAMTA1	+
chr1	7395115	7395280	7395205		12	52.05	8.77	2.13	12		-132683	7527888	7829763	CAMTA1	+
chr1	7740326	7740701	7740565		21	106.79	16.35	0.19	12		8440	7732125	7829763	CAMTA1	+
chr1	7764072	7765199	7764230		76	552.64	33.01	0	15		-32238	7796468	7827916	CAMTA1	+
chr1	7843874	7844722	7844115		117	1263.88	84.71	0	34		-265	7844380	7864018	PER3	+
chr1	8021542	8022069	8021870		50	333.82	23.89	0	19		62	8021808	8031581	PARK7	+
chr1	8085744	8086725	8086310		157	1624.95	89.99	0	45		33	8064464	8086343	ERRFI1	-
chr1	8097678	8097847	8097735		14	67.94	10.48	0.89	13		-11367	8071779	8086368	ERRFI1	-
chr1	8377962	8378285	8378185		35	258.47	32.7	0	26		16	8378169	8404227	SLC45A1	+
chr1	8483631	8484062	8483775		45	469.98	58.64	0	21		-49	8425936	8483726	RERE	-
chr1	8484096	8484353	8484280		13	98.82	27.93	0.25	10		14	8425940	8484294	RERE	-
chr1	8762917	8763849	8763385		210	2151.04	91.72	0	67		-107	8716252	8763278	RERE	-
chr1	8877599	8877908	8877735		34	265.25	28.65	0	21		53621	8921064	8931356	ENO1	-
chr1	8877921	8878300	8878075		40	385.91	51.35	0	20		53281	8921064	8931356	ENO1	-
chr1	8938704	8939483	8939360		85	590.01	38.99	0	30		-52	8934915	8939308	ENO1	-
chr1	9188571	9189363	9189155		137	1673.49	117.29	0	42		-315	9171228	9188840	GPR157	-
chr1	9294522	9295357	9294920		86	857.06	58.64	0	21		57	9294863	9331396	H6PD	+
chr1	9599153	9600181	9599535		136	1139.98	67.49	0	44		-6	9599541	9642831	SLC25A33	+
chr1	9648529	9649546	9648895		169	1474.48	67.85	0	52		-85	9648980	9665012	TMEM201	+
chr1	9749560	9749791	9749655		38	385.08	51.06	0	29		1421	9748234	9752004	PIK3CD	+
chr1	9883779	9884227	9883980		34	209.12	15.81	0.03	11		62	9789086	9884042	CLSTN1	-
chr1	9969735	9970844	9970370		166	1470.66	52.82	0	36		24	9910167	9970394	CTNNBIP1	-
chr1	10092599	10093057	10092815		23	84.65	10.76	0.38	11		-75	10092890	10240425	UBE4B	+
chr1	10270396	10271140	10270675		105	864.98	51.16	0	39		-89	10270764	10441657	KIF1B	+
chr1	10458560	10459703	10459500		139	1017.99	61.62	0	48		370	10459130	10464333	PGD	+
chr1	10490259	10490862	10490465		27	117.87	17.61	0.17	12		-35	10490500	10502766	APITD1	+
chr1	10754430	10755323	10754945		87	703.62	35.59	0	18		-409	10713041	10754536	CASZ1	-
chr1	10764651	10764997	10764775		20	88.73	15.27	0.35	15		857	10764253	10765632	CASZ1	-
chr1	10853823	10854464	10854030		54	510.2	72.61	0	25		-88398	10764253	10765632	CASZ1	-
chr1	10856193	10856633	10856395		24	94.15	12.62	0.28	13		-90763	10764253	10765632	CASZ1	-
chr1	10895860	10896241	10896085		46	487.82	67.91	0	27		111842	11006532	11007927	C1orf127	-
chr1	10926984	10927146	10927065		12	84.8	17.22	0.38	12		80862	11006532	11007927	C1orf127	-
chr1	10927204	10927498	10927385		29	195.85	16.35	0.03	12		80542	11006532	11007927	C1orf127	-
chr1	11119596	11120351	11120060		54	247.14	18.58	0	19		17	11116068	11120077	SRM	-
chr1	11538687	11539326	11538930		37	138.88	18.58	0.13	19		-293	11539223	11542017	PTCHD2	+
chr1	11710458	11710998	11710735		151	1552.33	75.93	0	69		35	11709585	11710770	FBXO2	-
chr1	11714771	11715200	11714995		18	67.35	10.09	0.92	11		28	11714967	11721406	FBXO44	+
chr1	11724083	11724368	11724225		14	69.21	15.11	0.81	12		44	11724181	11734411	FBXO6	+
chr1	11865523	11866270	11866005		75	432.98	31.3	0	32		-202	11866207	11903201	CLCN6	+
chr1	11919394	11919584	11919510		15	54.23	6.73	1.93	12		-518	11917522	11918992	NPPB	-
chr1	11994682	11995013	11994805		26	136.63	12.67	0.12	13		-5	11994810	12035595	PLOD1	+
chr1	12079193	12079417	12079280		14	66.92	13.2	0.93	10		-243	12079523	12092102	MIIP	+
chr1	12079486	12079822	12079605		33	282.86	38.01	0	19		25	12079580	12092100	MIIP	+
chr1	12289985	12290325	12290105		24	119.97	14.01	0.16	14		-19	12290124	12572099	VPS13D	+
chr1	12537981	12538694	12538295		50	374.9	28.61	0	13		13300	12524995	12572099	VPS13D	+
chr1	12537981	12538694	12538515		50	374.9	28.61	0	13		13520	12524995	12572099	VPS13D	+
chr1	12600217	12600753	12600505		49	443.37	60.23	0	24		43225	12557280	12566961	VPS13D	+
chr1	12609043	12609654	12609320		42	275.75	31.69	0	17		47001	12638746	12656321	DHRS3	-
chr1	12655121	12655390	12655315		17	93.73	15.45	0.28	13		1006	12638746	12656321	DHRS3	-
chr1	12655733	12656346	12656090		109	1205.62	114.65	0	54		231	12638746	12656321	DHRS3	-
chr1	12677972	12678285	12678065		23	171.64	29.93	0.06	16		-328	12627939	12677737	DHRS3	-
chr1	12678305	12678749	12678570		38	299.82	31.34	0	16		-833	12627939	12677737	DHRS3	-
chr1	14026478	14027283	14026885		69	467.58	29.34	0	19		150	14026735	14151560	PRDM2	+
chr1	14075525	14076560	14075720		114	1114.46	59.55	0	22		-211	14075931	14149914	PRDM2	+
chr1	14219272	14219948	14219635		120	1482.55	150.8	0	53		-496	14220131	14507186	C1orf196	+
chr1	14925087	14925804	14925280		35	125.44	12.1	0.15	11		-214	14925494	15392293	RP1-21O18.1	+
chr1	15053897	15053992	15053950		11	162.58	16.14	0.06	11		128456	14925494	15392293	RP1-21O18.1	+
chr1	15250343	15251367	15250875		72	513.06	29.34	0	16		249	15250626	15394648	RP1-21O18.1	+
chr1	15479873	15480825	15480225		93	856.8	66.62	0	28		-60	15480285	15546872	TMEM51	+
chr1	15736153	15736734	15736255		52	470.34	42.83	0	18		-186	15736441	15756834	EFHD2	+
chr1	15943726	15944627	15943985		200	2381.76	140.43	0	68		-53	15944038	15960801	DDI2	+
chr1	16010688	16011203	16010825		28	170.26	21.05	0.06	11		-60	16010885	16061264	PLEKHM2	+
chr1	16160855	16161867	16161465		119	1154.64	76.45	0	33		-12894	16174359	16266955	SPEN	+
chr1	16162200	16162646	16162410		19	69.22	13.2	0.82	11		-11949	16174359	16266955	SPEN	+
chr1	16173780	16175109	16174205		204	1822.8	86.57	0	60		-154	16174359	16266955	SPEN	+
chr1	16301893	16302321	16302135		22	173.28	35.76	0.05	13		464	16272341	16302599	ZBTB17	-
chr1	16399961	16400303	16400155		31	208.59	26.41	0.03	21		-28	16384774	16400127	FAM131C	-
chr1	16482202	16482685	16482515		62	504.08	44.03	0	30		32	16474873	16482547	EPHA2	-
chr1	16533163	16533816	16533605		84	811.99	52.02	0	26		-128	16532122	16533477	ARHGEF19	-
chr1	16563500	16563967	16563675		48	448.05	61.62	0	28		-180	16555170	16563495	C1orf89	-
chr1	16678797	16679345	16679065		50	394.43	35.21	0	20		-5	16679070	16719850	C1orf144	+
chr1	16825205	16825964	16825655		105	472.39	16.05	0	30		-36600	16862255	16864669	AL355149.4	+
chr1	16861170	16861848	16861515		35	55.32	6.52	1.83	11		-740	16862255	16864669	AL355149.4	+
chr1	16939515	16940527	16940025		136	474.99	13.83	0	33		-59381	16999406	17000037	AL137798.2	+
chr1	16970973	16971412	16971245		48	157.06	13.2	0.06	29		-28161	16999406	17000037	AL137798.2	+
chr1	17034271	17034718	17034420		24	87.31	10.85	0.36	10		35014	16999406	17000037	AL137798.2	+
chr1	17199122	17199690	17199230		33	120.87	11.02	0.16	10		-562	17196254	17198668	BX284668.1	-
chr1	17199122	17199690	17199535		33	120.87	11.02	0.16	10		-867	17196254	17198668	BX284668.1	-
chr1	17240083	17241185	17240435		167	1194.68	37.87	0	38		-8010	17248445	17299459	CROCC	+
chr1	17274686	17275287	17274935		90	620.22	34.33	0	39		49	17274886	17277833	CROCC	+
chr1	17287168	17287715	17287430		54	421.61	36.99	0	22		-5093	17292523	17297237	CROCC	+
chr1	17337948	17338637	17338405		61	271.73	20.81	0	25		-6145	17328815	17332260	ATP13A2	-
chr1	17764062	17765210	17764665		178	1690.48	60.69	0	36		392	17735172	17765057	RCC2	-
chr1	17766045	17766626	17766345		67	703.17	82.7	0	31		-125	17733256	17766220	RCC2	-
chr1	17865913	17866740	17866290		106	962.09	61.96	0	33		-40	17866330	18024364	ARHGEF10L	+
chr1	19228840	19229144	19229005		22	184.24	33.01	0.04	14		42	19197926	19229047	ALDH4A1	-
chr1	19281908	19283229	19282410		134	854.19	31.42	0	27		-66	19230774	19282344	IFFO2	-
chr1	19638297	19639215	19638530		66	392.31	26.41	0	18		-210	19638740	19654115	PQLC2	+
chr1	19811992	19812790	19812435		72	594.66	41.92	0	18		-402	19683245	19812033	CAPZB	-
chr1	19970471	19971400	19970780		80	409.32	27.63	0	26		-28	19970808	19984945	NBL1	+
chr1	20811687	20812411	20812305		53	396.78	26.01	0	13		408	20808884	20812713	CAMK2N1	-
chr1	20812643	20813078	20812745		29	212.43	25.43	0.03	13		-32	20808884	20812713	CAMK2N1	-
chr1	20959873	20960476	20960025		52	327.99	34.56	0	24		77	20959948	20978004	PINK1	+
chr1	21044405	21044696	21044600		18	146.23	25.48	0.09	11		9980	21048021	21054580	SH2D5	-
chr1	21112778	21114076	21113945		178	1510.82	57.22	0	39		-764	21102447	21113181	HP1BP3	-
chr1	21502458	21502982	21502795		53	398.73	40.06	0	26		57303	21546431	21560098	ECE1	-
chr1	21503014	21503380	21503115		59	642.89	70.43	0	32		56983	21546431	21560098	ECE1	-
chr1	21671593	21672394	21671820		57	389.04	24.65	0	13		-190	21599328	21671630	ECE1	-
chr1	21766417	21766938	21766595		30	113.93	10.11	0.16	11		-62	21766657	21811393	NBPF3	+
chr1	21948843	21949233	21949000		18	57.24	8.8	1.68	10		-12357	21929316	21936643	RAP1GAP	-
chr1	21978062	21978593	21978305		44	321.69	29.9	0	18		24	21938519	21978329	RAP1GAP	-
chr1	22109168	22109960	22109610		115	938.67	41.5	0	33		78	22054340	22109688	USP48	-
chr1	22263491	22264350	22263730		99	897.88	89.99	0	43		-39784	22303514	22315837	CELA3B	+
chr1	22379612	22380039	22379825		39	348.85	59.42	0	26		35	22379790	22413283	CDC42	+
chr1	22468743	22470248	22469580		144	1098.79	54.58	0	31		-61	22453760	22469519	WNT4	-
chr1	22668571	22668906	22668695		16	107.92	20.96	0.17	10		-109649	22778344	22857650	ZBTB40	+
chr1	22778162	22778471	22778290		13	86.65	22.01	0.38	10		-54	22778344	22857650	ZBTB40	+
chr1	22889500	22890353	22889995		125	1441.02	114.49	0	41		-62	22890057	22930087	EPHA8	+
chr1	23037187	23037950	23037320		55	433.17	44.84	0	18		-143	23037463	23240763	EPHB2	+
chr1	23345680	23346389	23345995		76	430.85	25.89	0	27		9	23345986	23410181	KDM1A	+
chr1	23494549	23494849	23494710		28	258.57	39.13	0	15		600	23416920	23495310	LUZP1	-
chr1	23495040	23495540	23495265		34	272.22	46.33	0	20		45	23416920	23495310	LUZP1	-
chr1	23504003	23504592	23504225		66	558.95	47.4	0	28		76	23419936	23504301	LUZP1	-
chr1	23670597	23671523	23671215		119	1159.28	110.04	0	50		-405	23664763	23670810	HNRNPR	-
chr1	23695312	23695626	23695500		19	138.03	19.56	0.12	10		-291	23695791	23696171	AL109936.1	+
chr1	23810482	23811007	23810690		44	334.25	28.17	0	16		-5	23767843	23810685	ASAP3	-
chr1	23856888	23857726	23857145		47	270.26	24.65	0	13		567	23832922	23857712	E2F2	-
chr1	23880995	23881780	23881555		174	1782.79	69.19	0	49		4011	23884425	23885566	ID3	-
chr1	23884563	23885295	23884895		68	651.23	58.69	0	22		671	23884425	23885566	ID3	-
chr1	23885655	23886312	23885890		31	190.43	22.57	0.04	10		44	23884936	23885934	ID3	-
chr1	23888782	23889166	23889025		27	156.57	20.12	0.06	15		-2740	23884409	23886285	ID3	-
chr1	23945920	23946363	23946095		36	285.04	36.36	0	19		-7729	23953824	23967058	MDS2	+
chr1	24069544	24070633	24070415		70	212.47	14.76	0.03	20		453	24069962	24086387	TCEB3	+
chr1	24165026	24165265	24165165		15	77.13	12.68	0.51	12		-13248	24130078	24151917	HMGCL	-
chr1	24306352	24306673	24306480		18	102.38	15.59	0.21	11		322	24297852	24306802	SFRS13A	-
chr1	24513548	24513969	24513815		28	153.91	17.34	0.07	14		-64	24483589	24513751	IL28RA	-
chr1	24648205	24648863	24648415		35	205.73	19.37	0.03	11		-1115	24649530	24680978	GRHL3	+
chr1	24648891	24649287	24649105		17	100.15	24.21	0.23	10		-425	24649530	24680978	GRHL3	+
chr1	24829151	24829803	24829410		164	1516.9	61.62	0	63		23	24829387	24863504	RCAN3	+
chr1	24969418	24969853	24969725		41	332.74	38.73	0	21		131	24969594	24999771	SRRM1	+
chr1	25071345	25072647	25071495		160	1527.13	98.77	0	46		-405	25071900	25124454	CLIC4	+
chr1	25174573	25175319	25175065		54	273.54	17.61	0	16		80224	25229063	25255289	RUNX3	-
chr1	25256053	25256673	25256535		38	173.82	16.51	0.05	15		-1246	25229063	25255289	RUNX3	-
chr1	25574231	25574572	25574325		20	61.74	9.03	1.31	10		-340	25570981	25573985	C1orf63	-
chr1	25664872	25665172	25665005		27	209.38	22.89	0.03	13		54	25664951	25683344	TMEM50A	+
chr1	25756415	25756945	25756695		49	308.1	23.37	0	19		-693	25757388	25826700	TMEM57	+
chr1	25757414	25758127	25757865		51	257.04	18.71	0	17		454	25757411	25826700	TMEM57	+
chr1	25869874	25870727	25870115		55	392.9	30.81	0	14		44	25870071	25895377	LDLRAP1	+
chr1	25942549	25944086	25943235		293	3222.27	118.04	0	59		-724	25943959	26112698	MAN1C1	+
chr1	26126541	26127079	26126785		45	333.77	28.78	0	17		101	26126684	26144712	SEPN1	+
chr1	26185637	26186137	26185975		51	429.66	32.34	0	18		-72	26160497	26185903	C1orf135	-
chr1	26201661	26202504	26202155		95	675.39	39.63	0	32		-4411	26187701	26197744	PAQR7	-
chr1	26232129	26232501	26232375		17	115.71	24.83	0.16	11		269	26226609	26232644	STMN1	-
chr1	26232649	26233059	26232965		26	156.71	17.61	0.06	12		-57	26227059	26232908	STMN1	-
chr1	26361789	26362205	26362035		18	76.09	13.83	0.56	11		3414	26358621	26361495	EXTL1	+
chr1	26437266	26437750	26437400		39	328.39	30.81	0	13		-264	26437664	26448615	PDIK1L	+
chr1	26437766	26439019	26438255		102	792.96	44.16	0	20		-85	26438340	26450524	PDIK1L	+
chr1	26488250	26488692	26488455		24	148.65	19.37	0.07	11		2944	26485511	26489119	GRRP1	+
chr1	26496065	26496582	26496425		31	176.6	23.48	0.05	16		63	26496362	26498551	ZNF593	+
chr1	26560440	26561133	26560685		60	441.87	29.9	0	18		-8	26560693	26603784	CCDC21	+
chr1	26606205	26606869	26606505		61	395.01	27.67	0	22		-108	26606613	26607941	SH3BGRL3	+
chr1	26662856	26663504	26663130		33	177.8	22.44	0.05	12		7313	26662959	26670443	AIM1L	-
chr1	26798988	26799386	26799175		19	55.84	8.78	1.77	10		165	26799010	26802463	HMGN2	+
chr1	26799424	26799850	26799670		36	334.96	47.47	0	16		-27	26799697	26802056	HMGN2	+
chr1	26826668	26827761	26827145		105	710.66	31.64	0	23		27225	26799920	26801851	HMGN2	+
chr1	26856119	26856775	26856535		48	225.7	14.67	0.03	15		277	26856258	26900934	RPS6KA1	+
chr1	26947504	26947737	26947665		20	111.26	16.48	0.16	16		48904	26898761	26901225	RPS6KA1	+
chr1	27021796	27023110	27022360		107	774.03	50.57	0	27		-162	27022522	27108601	ARID1A	+
chr1	27153010	27153729	27153235		66	246.67	12.04	0	19		-214	27153449	27182207	ZDHHC18	+
chr1	27191408	27192237	27191775		77	496.64	26.41	0	21		2122	27189653	27190947	SFN	+
chr1	27320063	27321041	27320295		123	1100.38	56.34	0	32		19032	27331511	27339327	FAM46B	-
chr1	27560806	27561468	27561230		71	544.95	39.61	0	26		71	27561159	27634735	WDTC1	+
chr1	27675924	27676861	27676575		101	594.41	33.26	0	32		337	27676238	27678070	SYTL1	+
chr1	27692659	27693278	27692830		62	507.73	45.78	0	25		7339	27696964	27700169	FCN3	-
chr1	27854262	27855093	27854715		91	566.1	36.62	0	36		-38046	27730730	27816669	WASF2	-
chr1	27901868	27902737	27902630		91	841.87	53.28	0	21		27295	27879238	27929925	AHDC1	-
chr1	27929827	27930874	27930570		88	626.01	52.82	0	30		-209	27860787	27930361	AHDC1	-
chr1	27986250	27986719	27986390		34	285.07	35.69	0	14		9435	27992576	27995825	IFI6	-
chr1	28052077	28053077	28052515		94	788.8	77.55	0	37		-53	28052568	28087092	FAM76A	+
chr1	28090919	28091263	28091080		13	78.27	23.06	0.5	10		-8614	28099694	28150963	STX12	+
chr1	28099463	28099843	28099665		18	73.21	12.1	0.62	11		-29	28099694	28150963	STX12	+
chr1	28286279	28287017	28286755		70	252.12	15.38	0	25		782	28285973	28294607	XKR8	+
chr1	28696034	28696624	28696545		31	152.25	16.14	0.07	10		290	28696255	28823668	PHACTR4	+
chr1	28844600	28845340	28844905		68	430.47	29.34	0	24		-233	28845138	28857085	RCC1	+
chr1	28860147	28860481	28860380		21	129.62	26.54	0.13	18		1933	28858447	28862417	RCC1	+
chr1	28908153	28908696	28908490		34	110.28	10.27	0.16	14		-106	28905050	28908384	SNHG12	-
chr1	28969393	28969898	28969725		22	93.88	13.14	0.28	10		-128	28939759	28969597	TAF12	-
chr1	28995169	28995858	28995545		147	1636.1	116.2	0	66		253	28995292	29041385	GMEB1	+
chr1	29063177	29063730	29063480		45	174.14	11.84	0.05	16		18	29063462	29095637	YTHDF2	+
chr1	29138367	29139288	29138645		134	1232.45	58.44	0	36		-9	29138654	29190208	OPRD1	+
chr1	29211508	29211871	29211665		39	306.48	38.97	0	27		-1963	29213628	29446958	EPB41	+
chr1	29240727	29241612	29241095		192	1979.96	102.71	0	68		4	29241091	29391733	EPB41	+
chr1	29507867	29508796	29508555		97	626.99	38.6	0	32		-13404	29486894	29495151	SFRS4	-
chr1	29562684	29563353	29563045		51	285.76	24.96	0	19		17	29563028	29653312	PTPRU	+
chr1	29563714	29565197	29564055		255	1326.44	23.3	0	46		898	29563157	29652173	PTPRU	+
chr1	31279968	31280579	31280155		28	164.25	21.47	0.06	10		-49472	31206384	31230683	LAPTM5	-
chr1	31296765	31297532	31297000		41	196.9	17.58	0.03	12		53094	31342313	31350094	SDC3	-
chr1	31380286	31380743	31380495		19	53.07	8.8	2.05	10		1113	31345982	31381608	SDC3	-
chr1	31381050	31381976	31381595		136	1198.64	68.96	0	47		13	31345982	31381608	SDC3	-
chr1	31538370	31539147	31538785		166	1845.04	107.4	0	61		-255	31468029	31538530	PUM1	-
chr1	31654355	31654611	31654475		18	100.41	14.31	0.23	12		6525	31652593	31661000	NKAIN1	-
chr1	31711896	31713003	31712315		130	815.23	22.5	0	23		84	31652592	31712399	NKAIN1	-
chr1	31760718	31760976	31760800		23	111.89	15.96	0.16	21		1466	31744055	31762266	SNRNP40	-
chr1	32180038	32180420	32180250		22	63.72	6.74	1.16	10		16656	32192718	32196906	BAI2	-
chr1	32180661	32181116	32180895		20	84.1	13.83	0.39	11		16011	32192718	32196906	BAI2	-
chr1	32228245	32228793	32228490		65	637.69	68.23	0	31		-1863	32222818	32226627	BAI2	-
chr1	32229263	32230663	32229970		127	717.81	27.51	0	24		-3343	32222818	32226627	BAI2	-
chr1	32402997	32404599	32403875		284	3165.68	110.04	0	48		-232	32384778	32403643	PTP4A2	-
chr1	32479107	32479958	32479425		76	391.79	16.88	0	17		-102	32479527	32509478	KHDRBS1	+
chr1	32528131	32528546	32528365		20	125.68	25.43	0.15	13		-9267	32537632	32568464	TMEM39B	+
chr1	32538231	32538888	32538705		40	244.08	21.13	0	12		145	32538560	32557610	TMEM39B	+
chr1	32645063	32645812	32645535		86	526.44	29.24	0	30		248	32645287	32663886	TXLNA	+
chr1	32713778	32714266	32714025		38	283.15	35.93	0	20		1191	32712834	32714457	FAM167B	+
chr1	32757496	32757975	32757740		38	205.19	15.85	0.03	15		4	32757736	32793275	HDAC1	+
chr1	32801250	32802141	32801795		57	323.79	23.48	0	16		185	32799433	32801980	MARCKSL1	-
chr1	32817047	32817657	32817265		105	1089.81	100.61	0	56		-10533	32827798	32829913	TSSK3	+
chr1	32965808	32966702	32966490		196	1808.02	53.92	0	48		19859	32946631	32953461	ZBTB8A	+
chr1	33005058	33005782	33005465		70	497.06	26.41	0	18		435	33005030	33066591	ZBTB8A	+
chr1	33116504	33117131	33116645		38	241.45	22.89	0	13		-182	33116827	33118107	RBBP4	+
chr1	33168044	33168498	33168375		36	187.81	17.02	0.04	16		-14	33145507	33168361	SYNC	-
chr1	33168598	33169005	33168835		20	67.43	9.78	0.93	10		-115	33145961	33168720	SYNC	-
chr1	33207168	33207900	33207395		67	545.06	44.02	0	22		-117	33207512	33240571	KIAA1522	+
chr1	33219418	33220094	33219605		29	81.5	10.76	0.45	11		-17	33219622	33240571	KIAA1522	+
chr1	33282805	33283149	33282950		29	206.04	26.41	0.03	17		-93	33283043	33323455	S100PBP	+
chr1	33336137	33336758	33336330		94	787.58	56.59	0	45		17	33327895	33336347	FNDC5	-
chr1	33351940	33352521	33352345		34	80.21	8.8	0.44	14		282	33352063	33359744	HPCA	+
chr1	33366769	33367302	33367075		49	433.98	39.61	0	17		-36	33360447	33367039	TMEM54	-
chr1	33429410	33430659	33429645		205	1381.53	29.61	0	36		246	33402055	33429891	RNF19B	-
chr1	33646598	33647348	33646875		62	306.61	18.89	0	20		392	33611003	33647267	TRIM62	-
chr1	33721497	33722699	33722495		105	850.3	40.95	0	19		349	33722146	33746015	ZNF362	+
chr1	33814803	33815817	33815425		124	923.46	32.7	0	25		-52	33795672	33815373	PHC2	-
chr1	33815890	33816396	33816155		31	138.52	15.62	0.12	14		-782	33795672	33815373	PHC2	-
chr1	33895930	33896851	33896405		106	583.09	19.48	0	24		248	33837927	33896653	PHC2	-
chr1	35657440	35657940	35657705		28	175.87	25.43	0.05	12		1044	35648533	35658749	SFPQ	-
chr1	36273465	36274417	36273625		71	389.15	20.12	0	16		-148	36273773	36323491	EIF2C4	+
chr1	36348538	36349118	36348860		40	180.8	15.34	0.04	14		50	36348810	36389900	EIF2C1	+
chr1	36396190	36397337	36396705		171	1184.86	36.75	0	40		-67	36396772	36448253	EIF2C3	+
chr1	36549491	36549783	36549605		16	95.74	16.7	0.26	10		-71	36549676	36553876	TEKT2	+
chr1	36554305	36554904	36554595		41	196.9	13.73	0.03	13		84	36554511	36558779	ADPRHL2	+
chr1	36622352	36622784	36622605		24	133.42	20.54	0.13	13		806	36621799	36646448	MAP7D1	+
chr1	36772021	36772400	36772270		19	84.98	13.2	0.38	10		282	36771988	36785398	C1orf113	+
chr1	36772444	36772899	36772525		33	190.19	22.75	0.04	16		-186	36772711	36786832	C1orf113	+
chr1	36789260	36789510	36789365		17	107.02	18.53	0.19	11		30	36789335	36794818	AL591845.1	+
chr1	36851197	36851645	36851475		32	190.19	28.99	0.04	22		2	36833455	36851477	STK40	-
chr1	36852079	36852650	36852330		41	232.08	17.62	0.02	14		-833	36805225	36851497	STK40	-
chr1	37939712	37940491	37940235		89	509.52	27.47	0	32		82	37940153	37949978	ZC3H12A	+
chr1	37979820	37980633	37980415		83	547.86	32.25	0	26		-147	37959535	37980268	MEAF6	-
chr1	38061487	38061825	38061615		19	66.39	9.6	1	11		-79	38059086	38061536	GNL2	-
chr1	38218452	38219096	38218865		136	1316.84	66.65	0	53		3498	38179561	38222363	EPHA10	-
chr1	38259463	38260246	38259855		146	1189.22	49.3	0	50		81	38259774	38265875	MANEAL	+
chr1	38273332	38274012	38273590		32	126.23	13.83	0.15	10		-228	38273818	38275126	C1orf122	+
chr1	38274049	38274523	38274285		46	332.08	37.63	0	26		-72	38274357	38274745	AL929472.3	+
chr1	38470945	38471372	38471155		31	212.55	36.97	0.03	21		123	38463017	38471278	FHL3	-
chr1	38511864	38512919	38512440		95	494.38	23.48	0	24		10	38509523	38512450	POU3F1	-
chr1	38512923	38513386	38513100		42	196.9	13.07	0.03	15		-650	38509523	38512450	POU3F1	-
chr1	39035848	39036128	39035960		13	80.93	23.62	0.45	11		277786	39305021	39313746	RRAGC	-
chr1	39249519	39249781	39249700		18	133.32	21.13	0.13	11		64046	39305021	39313746	RRAGC	-
chr1	39269460	39270142	39269870		91	687.87	46.9	0	38		43876	39305021	39313746	RRAGC	-
chr1	39281723	39282088	39281905		47	288.54	20.14	0	23		31841	39305021	39313746	RRAGC	-
chr1	39325209	39325741	39325375		69	491.65	34.11	0	31		120	39303870	39325495	RRAGC	-
chr1	39547037	39547573	39547155		43	261.06	16.35	0	12		167	39546988	39568653	MACF1	+
chr1	39547037	39547573	39547380		43	261.06	16.35	0	12		392	39546988	39568653	MACF1	+
chr1	39570622	39571807	39571035		210	1750.78	51.72	0	46		-66	39571101	39720320	MACF1	+
chr1	39740776	39741048	39740990		11	76.4	23.17	0.53	10		6620	39734370	39952789	MACF1	+
chr1	39874281	39875371	39875125		141	877.52	23.77	0	27		-4947	39880072	39893764	MACF1	+
chr1	39956842	39957736	39957405		62	242.89	15.85	0	17		87	39957318	39991607	BMP8A	+
chr1	40042070	40042321	40042245		18	79.57	8.8	0.46	11		195	40038065	40042440	PABPC4	-
chr1	40042385	40042699	40042580		38	231.19	17.61	0.02	19		-140	40038065	40042440	PABPC4	-
chr1	40098551	40099014	40098845		28	145.26	13.83	0.11	11		6772	40089825	40105617	HEYL	-
chr1	40137595	40138025	40137845		32	158.18	14.67	0.06	15		-135	40124793	40137710	NT5C1A	-
chr1	40253754	40255215	40254850		140	863	37.44	0	31		-317	40229357	40254533	BMP8B	-
chr1	40367013	40367870	40367605		95	711.41	41.08	0	28		-51	40362899	40367554	MYCL1	-
chr1	40420466	40421281	40420875		109	655.47	29.53	0	36		45	40420830	40435638	MFSD2A	+
chr1	40562641	40563118	40562965		56	257.3	17.43	0	28		-43	40538385	40562922	PPT1	-
chr1	40626901	40627189	40627075		14	55.25	9.78	1.84	10		30	40627045	40706593	RLF	+
chr1	40840200	40840493	40840275		19	109.08	16.35	0.17	13		-45	40840320	40888998	SMAP2	+
chr1	40915429	40916056	40915725		70	468.73	29.85	0	27		-46	40915771	40923050	ZNF643	+
chr1	40942782	40943309	40943025		24	63.4	9.6	1.15	12		138	40942887	40962015	ZNF642	+
chr1	41131193	41131477	41131315		17	142.58	27.6	0.12	11		14	41086351	41131329	RIMS3	-
chr1	41157283	41158074	41157755		85	686.59	50.79	0	30		70	41157685	41236778	NFYC	+
chr1	41248922	41249729	41249345		117	941.82	85.52	0	67		-339	41249684	41306124	KCNQ4	+
chr1	41249761	41250202	41250025		23	139.47	19.37	0.11	10		17	41250008	41304198	KCNQ4	+
chr1	41444770	41446028	41445265		148	926.16	24.45	0	25		-515	41445780	41450660	CTPS	+
chr1	41706880	41708427	41708005		188	984.57	28.61	0	37		-179	41651656	41707826	SCMH1	-
chr1	41826796	41827954	41827305		197	1719.2	61.62	0	48		-289	41827594	41849262	FOXO6	+
chr1	41832194	41832420	41832350		16	122.53	21.13	0.16	11		4747	41827603	41848353	FOXO6	+
chr1	41847353	41848421	41847765		99	836.84	44.02	0	21		20162	41827603	41848353	FOXO6	+
chr1	41961641	41962427	41962005		130	1211	64.56	0	45		-11661	41944798	41950344	EDN2	-
chr1	41981733	41982068	41981965		17	93.19	19.07	0.28	13		-31621	41944798	41950344	EDN2	-
chr1	42127242	42128681	42127905		188	1438.45	71.68	0	56		-33259	41975684	42094646	HIVEP3	-
chr1	42383530	42384030	42383755		54	310.71	18.52	0	21		414	41972036	42384169	HIVEP3	-
chr1	42501291	42501869	42501550		65	603.07	55.83	0	25		46	42312862	42501596	HIVEP3	-
chr1	42800416	42801238	42800985		50	312.36	28.17	0	16		-45481	42846466	42875836	RIMKLA	+
chr1	42845950	42846905	42846395		74	513.43	26.41	0	15		-71	42846466	42875836	RIMKLA	+
chr1	42922058	42922585	42922205		31	255.47	47.47	0	17		-27	42922232	42926085	PPCS	+
chr1	43148299	43149176	43148705		162	1765.39	108.21	0	55		47	43148658	43168020	YBX1	+
chr1	43282550	43283124	43283015		40	214.05	20.25	0.03	16		213	43282802	43310654	ERMAP	+
chr1	43389716	43390508	43390140		55	222.41	14.83	0.03	16		6656	43394819	43396796	SLC2A1	-
chr1	43423653	43424891	43424015		293	2067.1	41.21	0	68		485	43395018	43424500	SLC2A1	-
chr1	43438883	43439389	43439120		28	82.93	8.18	0.41	11		-14590	43417361	43424530	SLC2A1	-
chr1	43814512	43815046	43814815		47	342.97	39.25	0	24		-9811	43824626	43828874	CDC20	+
chr1	43832793	43833234	43832995		37	165.12	13.23	0.06	16		92	43829686	43833087	ELOVL1	-
chr1	43833398	43834335	43833845		134	1118.82	45.42	0	33		-146	43829073	43833699	ELOVL1	-
chr1	43919054	43919860	43919315		46	227.21	17.61	0.03	12		164	43918832	43919479	HYI	-
chr1	43996431	43996810	43996565		33	199.59	17.84	0.03	15		-9	43996574	44045749	PTPRF	+
chr1	43997186	43997545	43997280		31	262.05	35.21	0	15		706	43996574	44045749	PTPRF	+
chr1	44172883	44173724	44173225		53	241.19	16.51	0	15		-86	44173311	44237670	ST3GAL3	+
chr1	44350985	44351318	44351105		23	165.75	24.65	0.06	14		-14155	44365260	44395848	ST3GAL3	+
chr1	44402010	44402535	44402220		31	71.88	9.84	0.65	16		566	44401654	44402437	AL357079.2	+
chr1	44412114	44412481	44412265		19	131.2	25.15	0.13	12		-346	44412611	44433694	IPO13	+
chr1	44412532	44412834	44412645		15	84.75	19.37	0.38	11		34	44412611	44433694	IPO13	+
chr1	44440175	44440868	44440570		49	166.18	12.47	0.06	16		-47	44440617	44442779	ATP6V0B	+
chr1	44444609	44445801	44445555		99	638.94	26.41	0	18		447	44445108	44456840	B4GALT2	+
chr1	44457063	44457711	44457215		50	231.14	17.14	0.02	18		-123	44457338	44462200	CCDC24	+
chr1	44495671	44497306	44496115		156	1140.11	35.21	0	22		943	44468551	44497058	SLC6A9	-
chr1	44703399	44704136	44703565		80	804.23	56.96	0	22		10073	44687101	44713638	ERI3	-
chr1	44820671	44821094	44820900		32	127.93	8.96	0.14	12		10	44750502	44820910	ERI3	-
chr1	44870792	44871469	44871090		67	486.97	49.24	0	33		130	44870960	45117395	RNF220	+
chr1	44882925	44884018	44883185		89	704.12	57.97	0	26		4815	44878370	44885544	RNF220	+
chr1	45097127	45098010	45097685		99	781.1	42.02	0	27		51	45097634	45115629	RNF220	+
chr1	45241007	45241723	45241095		42	259.87	20.6	0	11		-213	45241308	45244451	RPS8	+
chr1	45251820	45252492	45252255		79	418.17	28.14	0	36		1122	45249257	45253377	BEST4	-
chr1	45265408	45266734	45266110		159	929.9	29.93	0	34		50	45266060	45271662	PLK3	+
chr1	45274013	45274340	45274215		20	120.34	21.66	0.16	15		20	45274195	45279598	BTBD19	+
chr1	45279421	45279734	45279600		21	129.62	20.73	0.13	14		430	45279170	45279771	BTBD19	+
chr1	45308738	45309226	45308975		42	241.25	16.14	0	14		-240	45287605	45308735	PTCH2	-
chr1	45671331	45672536	45672275		159	1348.68	63.7	0	40		-47	45482071	45672228	ZSWIM5	-
chr1	45769637	45769912	45769805		22	179.34	32.21	0.04	15		2076	45553747	45771881	ZSWIM5	-
chr1	45805531	45806098	45805885		63	558.87	43.08	0	23		38	45805847	45808650	TOE1	+
chr1	46049978	46050326	46050195		24	147.85	19.26	0.08	14		458	46049737	46083919	NASP	+
chr1	46216071	46216454	46216285		21	96.27	16.9	0.26	15		36	46164383	46216321	IPP	-
chr1	46268468	46269498	46269275		257	2946.72	144.51	0	87		-10	46269285	46501796	MAST2	+
chr1	46598104	46599163	46598665		115	957.81	77.25	0	43		-80	46531728	46598585	PIK3R3	-
chr1	46663907	46664612	46664245		88	600.16	34.18	0	32		-213	46660254	46664032	POMGNT1	-
chr1	46859711	46860336	46860055		55	320.05	25.35	0	23		12	46860043	46874870	FAAH	+
chr1	46955127	46955673	46955560		38	275.53	26.79	0	14		-17109	46972669	46979898	DMBX1	+
chr1	47133825	47134359	47134235		48	188.49	10.09	0.04	15		-136	47098413	47134099	ATPAF1	-
chr1	47184399	47185153	47185010		48	247.57	19.94	0	15		-274	47140831	47184736	KIAA0494	-
chr1	47779660	47779999	47779795		18	134.65	23.17	0.12	10		17	47767359	47779812	STIL	-
chr1	47799205	47799977	47799465		141	1052.47	45.93	0	53		-123	47799588	47844511	CMPK1	+
chr1	47902800	47904199	47903735		141	862.97	23.11	0	21		2046	47901689	47906363	FOXD2	+
chr1	47973681	47974545	47973925		63	423.45	35.21	0	20		72236	47901689	47906363	FOXD2	+
chr1	48175171	48175623	48175365		24	119.97	14.62	0.16	11		273676	47901689	47906363	FOXD2	+
chr1	48463146	48463707	48463245		37	218.77	23.09	0.03	14		-225112	48688357	48713273	SLC5A9	+
chr1	48937549	48938131	48937915		32	252.05	33.01	0	12		-88	48877159	48937827	SPATA6	-
chr1	50489407	50489887	50489665		30	220.89	29.64	0.03	14		29675	50459990	50461874	AL645730.1	+
chr1	50799228	50799620	50799375		31	210.87	27.88	0.03	19		87607	50883232	50886982	DMRTA2	-
chr1	51425352	51426170	51425895		141	1218.62	50.47	0	42		-95	50917758	51425800	FAF1	-
chr1	51433645	51434538	51434270		171	1740.01	110.18	0	70		-97	51434367	51440305	CDKN2C	+
chr1	51443306	51444273	51444005		168	1720.43	102.12	0	58		8389	51435616	51440230	CDKN2C	+
chr1	51701685	51702461	51702015		122	1147.35	73.88	0	47		4	51702011	51737234	RNF11	+
chr1	51795847	51796566	51796195		98	766.12	45.27	0	36		37	51753484	51796232	TTC39A	-
chr1	51984215	51985320	51984845		181	1792.79	68.67	0	38		54	51926795	51984899	EPS15	-
chr1	52194891	52195597	52195250		72	622.81	58.69	0	30		-230	52195480	52226452	OSBPL9	+
chr1	52456096	52456480	52456190		27	202.59	24.88	0.03	13		246	52373628	52456436	RAB3B	-
chr1	52498848	52499553	52499375		36	126.87	12.43	0.14	12		113	52497775	52499488	KTI12	-
chr1	52520647	52520937	52520795		46	405.76	51.56	0	41		-1002	52521797	52556388	BTF3L4	+
chr1	52607370	52608351	52607725		174	1358.61	47.07	0	47		-321	52608046	52812187	ZFYVE9	+
chr1	52831210	52831622	52831430		25	131.81	25.15	0.13	20		434	52820055	52831864	CC2D1B	-
chr1	52831624	52832283	52831865		87	623.36	36.31	0	33		-1	52820055	52831864	CC2D1B	-
chr1	53018325	53018857	53018555		43	213.41	13.14	0.03	14		111	52980450	53018666	ZCCHC11	-
chr1	53018325	53018857	53018685		43	213.41	13.14	0.03	14		-19	52980450	53018666	ZCCHC11	-
chr1	53019064	53019543	53019245		50	376.17	30.99	0	22		-488	52991692	53018757	ZCCHC11	-
chr1	53192046	53192604	53192400		52	398.73	31.17	0	18		219	53192181	53293014	ZYG11B	+
chr1	53308050	53309085	53308465		274	2409.81	54.72	0	65		57	53308408	53360670	ZYG11A	+
chr1	53392861	53393232	53393005		30	171.78	19.65	0.06	17		-43	53393048	53517282	SCP2	+
chr1	53685888	53686513	53686090		45	134.96	8.57	0.12	13		182	53685207	53686272	C1orf123	-
chr1	53792073	53793145	53792425		97	697.3	45.66	0	29		1064	53755004	53793489	LRP8	-
chr1	53793269	53794225	53793830		213	2533.9	135.12	0	66		-341	53755004	53793489	LRP8	-
chr1	53935771	53936245	53936005		33	199.59	26.48	0.03	19		10356	53925649	53930352	DMRTB1	+
chr1	54204208	54205273	54204825		255	2313.06	56.73	0	58		-4948	53971910	54199877	GLIS1	-
chr1	54303667	54304283	54303875		89	600.8	34.33	0	38		261	54284643	54304136	TMEM48	-
chr1	54411731	54412324	54412240		42	264.96	16.01	0	10		214	54412026	54433841	LRRC42	+
chr1	54411731	54412324	54412050		42	264.96	16.01	0	10		24	54412026	54433841	LRRC42	+
chr1	54738609	54739391	54739185		50	377.54	44.02	0	18		-16246	54704769	54722939	SSBP3	-
chr1	54752855	54753308	54753065		44	327.91	29.34	0	20		-30126	54704769	54722939	SSBP3	-
chr1	54871545	54872644	54872015		197	1761.8	75.46	0	60		-36	54704769	54871979	SSBP3	-
chr1	54953667	54954323	54953965		140	1559.64	80.99	0	46		-53965	55007930	55075797	ACOT11	+
chr1	54955008	54955360	54955110		19	134.48	20.96	0.12	10		-52820	55007930	55075797	ACOT11	+
chr1	55007550	55008472	55007845		116	714.59	35.21	0	38		-85	55007930	55075797	ACOT11	+
chr1	55352418	55353113	55352885		61	267.82	12.25	0	16		6	55315306	55352891	DHCR24	-
chr1	55680306	55681555	55681075		137	1145.41	59.86	0	33		-120083	55559226	55560992	USP24	-
chr1	57044322	57044676	57044480		20	88.73	13.54	0.35	13		777	56960435	57045257	PPAP2B	-
chr1	57044919	57045275	57045055		30	155	15.65	0.07	16		202	56960435	57045257	PPAP2B	-
chr1	57110507	57111472	57111020		125	1263.18	67.72	0	30		25	57110995	57181008	PRKAA2	+
chr1	57889399	57889806	57889635		17	67.35	13.17	0.92	11		94	57536407	57889729	DAB1	-
chr1	59012337	59012659	59012425		15	54.23	9.48	1.93	10		49	58999975	59012474	OMA1	-
chr1	59247955	59248576	59248195		63	283.53	14.37	0	21		1590	59246465	59249785	JUN	-
chr1	59248977	59249649	59249460		32	145.31	17.61	0.11	11		325	59246465	59249785	JUN	-
chr1	59249869	59250241	59250015		25	157.17	17.61	0.06	12		-230	59246465	59249785	JUN	-
chr1	59280867	59281379	59281110		50	449.84	68.71	0	31		-31325	59246465	59249785	JUN	-
chr1	59281847	59282423	59282125		61	577.33	79	0	35		-32340	59246465	59249785	JUN	-
chr1	59369122	59369930	59369425		117	1226.4	83.63	0	38		-119640	59246465	59249785	JUN	-
chr1	59761970	59762334	59762255		27	189.05	32.13	0.04	19		-212	59762467	59844509	FGGY	+
chr1	60280419	60281067	60280575		31	175.68	23.17	0.05	10		-269	60280844	60338679	HOOK1	+
chr1	60392305	60392582	60392485		20	178.16	34.26	0.05	14		-52	60358992	60392433	CYP2J2	-
chr1	61515772	61516155	61516005		19	111.26	18.59	0.16	11		-3497	61519502	61798258	NFIA	+
chr1	61516159	61516877	61516755		56	358.45	23.74	0	15		-2747	61519502	61798258	NFIA	+
chr1	61522606	61523039	61522750		32	146.41	19.1	0.09	20		3248	61519502	61798258	NFIA	+
chr1	61542609	61543057	61542805		31	264.23	50.27	0	17		-141	61542946	61928459	NFIA	+
chr1	61547557	61549600	61548115		324	3100	301.6	0	107		-280	61548395	61922054	NFIA	+
chr1	62208303	62208711	62208450		33	291.55	41.43	0	15		301	62208149	62629592	INADL	+
chr1	62784597	62785234	62785030		49	265.19	20.22	0	18		-58	62703216	62784972	KANK4	-
chr1	62902976	62903398	62903225		26	136.63	18.62	0.12	15		899	62902326	62917475	USP1	+
chr1	63153571	63154326	63153970		132	889.16	39.93	0	52		-54753	63090769	63099217	DOCK7	-
chr1	63782547	63783470	63783215		78	476.81	37.96	0	28		-5515	63788730	63790797	FOXD3	+
chr1	63787846	63789253	63789065		110	403.33	30.41	0	39		335	63788730	63790797	FOXD3	+
chr1	63789347	63790306	63789670		94	495.92	20.66	0	22		940	63788730	63790797	FOXD3	+
chr1	64058767	64059856	64059455		207	1900.29	90.55	0	71		50	64059405	64065893	PGM1	+
chr1	64239302	64240769	64240115		175	1265.03	52.82	0	42		401	64239714	64647181	ROR1	+
chr1	64505156	64505741	64505325		41	310.33	52.34	0	22		-163985	64669310	64733051	UBE2U	+
chr1	64935620	64936310	64935825		44	250.52	18.25	0	12		-603	64936428	65158741	CACHD1	+
chr1	64936344	64936779	64936485		34	276.29	40.63	0	18		10	64936475	65158741	CACHD1	+
chr1	64936922	64937259	64937175		25	168.57	23.8	0.06	16		700	64936475	65158741	CACHD1	+
chr1	65210208	65211374	65210550		123	777.64	30.81	0	27		-228	65210778	65298912	RAVER2	+
chr1	65431620	65432520	65432195		119	1163.1	79.65	0	38		-87449	65341668	65344746	JAK1	-
chr1	65468210	65468718	65468375		55	320.05	18.82	0	21		-123629	65341668	65344746	JAK1	-
chr1	65532227	65533416	65532915		204	2264.65	83.63	0	38		-80317	65613232	65691775	AK3L1	+
chr1	65613085	65613921	65613435		109	772.81	25.31	0	23		-78	65613513	65693173	AK3L1	+
chr1	65614071	65614885	65614380		91	621.42	49.03	0	41		-305	65614685	65692122	AK3L1	+
chr1	65719722	65720689	65720140		291	3100	301.6	0	108		-5	65720145	65880959	DNAJC6	+
chr1	65731284	65731936	65731505		35	200.42	26.95	0.03	15		1058	65730447	65830444	DNAJC6	+
chr1	65774827	65775859	65775600		93	783.05	88.03	0	39		372	65775228	65880959	DNAJC6	+
chr1	65886106	65886628	65886310		29	88.81	11.51	0.35	14		-41	65886351	65893692	LEPROT	+
chr1	65991028	65991543	65991205		51	283.15	22.71	0	24		-167	65991372	66075951	LEPR	+
chr1	66258342	66259046	66258765		46	230.3	21.1	0.02	16		-100	66258865	66713326	PDE4B	+
chr1	67390303	67390844	67390555		52	521.12	72.61	0	25		-85	67390640	67453714	MIER1	+
chr1	67390893	67391277	67390990		33	277.75	35.21	0	14		340	67390650	67413923	MIER1	+
chr1	67395640	67396401	67395980		58	521.91	41.89	0	15		54	67395926	67452353	MIER1	+
chr1	67519039	67520281	67519325		125	984.98	49.24	0	27		457	67465015	67519782	SLC35D1	-
chr1	67895922	67897103	67896555		101	728.59	56.96	0	32		-473	67878068	67896082	SERBP1	-
chr1	68150627	68151216	68151005		142	1644.82	100.42	0	59		93	68150912	68152271	GADD45A	+
chr1	68151370	68152644	68152215		99	322.48	18.24	0	25		856	68151359	68152269	GADD45A	+
chr1	68298337	68299465	68299215		141	1052.47	32.3	0	25		-96	68242821	68299119	GNG12	-
chr1	68696941	68697200	68697020		12	86.13	24.21	0.38	11		1184	68620926	68698204	GPR177	-
chr1	68962552	68963062	68962720		39	319.89	30.81	0	14		79	68939837	68962799	DEPDC1	-
chr1	70032911	70033383	70033155		56	457.64	39.61	0	25		-926	70034081	70589164	LRRC7	+
chr1	70033523	70034582	70034015		92	369.53	24.21	0	33		-66	70034081	70589164	LRRC7	+
chr1	70686850	70687619	70687155		102	1031.86	88.12	0	39		-8	70687163	70696951	SFRS11	+
chr1	71513019	71513609	71513410		53	264.24	18.21	0	20		-94	71318256	71513316	PTGER3	-
chr1	71741163	71741378	71741335		18	148.3	28.17	0.08	16		164186	71873175	71905521	NEGR1	-
chr1	72748423	72748775	72748600		177	2944.53	273.67	0	98		-429	71873129	72748171	NEGR1	-
chr1	72749228	72749697	72749435		38	359.52	69.81	0	25		-1264	71873129	72748171	NEGR1	-
chr1	75601940	75602636	75602135		91	1012.18	111.7	0	39		1568	75600567	75627218	LHX8	+
chr1	76080471	76080809	76080695		19	123.99	19.37	0.15	11		-3894	75667816	76076801	SLC44A5	-
chr1	76081556	76082001	76081735		45	321.28	28.79	0	22		-4934	75667816	76076801	SLC44A5	-
chr1	76190186	76190628	76190275		48	342.97	33.8	0	25		-119	76190394	76229364	ACADM	+
chr1	77333809	77334506	77334285		34	162.6	19.97	0.06	13		1118	77333167	77334759	ST6GALNAC5	+
chr1	77747313	77748103	77747625		94	912.62	68.23	0	30		-111	77747736	78025654	AK5	+
chr1	78148593	78149652	78149225		196	2224.3	136.45	0	62		-137	78098997	78149088	ZZZ3	-
chr1	78225149	78225717	78225325		33	199.59	23.38	0.03	14		-19984	78245309	78344106	FAM73A	+
chr1	78354166	78354844	78354610		44	328.44	33.01	0	15		263	78354347	78401604	NEXN	+
chr1	78956519	78956962	78956755		24	119.97	13.03	0.16	10		-2	78956757	79005434	PTGFR	+
chr1	82265996	82267410	82266650		182	1940.76	215.03	0	74		568	82266082	82458106	LPHN2	+
chr1	82267429	82267965	82267725		39	196.45	21.27	0.03	17		1643	82266082	82458106	LPHN2	+
chr1	82268478	82268861	82268635		20	120.34	20.28	0.16	12		2553	82266082	82458106	LPHN2	+
chr1	84464596	84465040	84464815		58	348.54	21.94	0	27		18	84372189	84464833	TTLL7	-
chr1	84543226	84544003	84543815		119	1163.18	68.67	0	38		70	84543745	84704181	PRKACB	+
chr1	84764087	84764566	84764225		44	436.09	72.61	0	26		176	84764049	84816479	SAMD13	+
chr1	84971285	84972574	84971625		179	1637.11	68.67	0	37		-349	84971974	84992571	SPATA1	+
chr1	85039810	85040297	85040025		49	365.02	35.8	0	25		79	85020536	85040104	CTBS	-
chr1	85155532	85156697	85156165		191	1905.9	98.6	0	55		321	85131802	85156486	SSX2IP	-
chr1	85358452	85359125	85358815		56	368.76	31.15	0	20		81	85279087	85358896	LPAR3	-
chr1	85462512	85463470	85462755		87	579.09	60.5	0	42		41	85391591	85462796	MCOLN2	-
chr1	85513566	85514659	85514195		111	726.7	31.3	0	26		-26	85491834	85514169	MCOLN3	-
chr1	85665890	85667768	85666675		438	3100	93.06	0	74		53	85623356	85666728	SYDE2	-
chr1	85742112	85742642	85742235		31	139.41	12.1	0.11	10		538	85731931	85742773	BCL10	-
chr1	85930148	85931193	85930635		132	1304.55	65.46	0	29		31329	85947966	85961964	DDAH1	-
chr1	86041997	86043125	86042820		104	941.22	70.43	0	27		-279	85961422	86042541	DDAH1	-
chr1	86046098	86046796	86046580		79	560.63	36.47	0	27		136	86046444	86049645	CYR61	+
chr1	86046875	86047378	86047125		37	143.84	12.8	0.1	16		242	86046883	86047782	CYR61	+
chr1	86622189	86622976	86622630		66	580.46	44.02	0	18		-4	86611802	86622626	COL24A1	-
chr1	87169953	87171094	87170355		241	2440.82	101.24	0	69		-223	87170578	87208951	SH3GLB1	+
chr1	87239949	87240356	87240170		19	114.47	22.48	0.16	12		40128	87200042	87213867	SH3GLB1	+
chr1	87380210	87380625	87380390		30	107.13	13.18	0.18	17		28	87380362	87575681	HS2ST1	+
chr1	87794034	87794896	87794620		126	1128.11	50.14	0	32		469	87794151	87812788	LMO4	+
chr1	87796973	87797613	87797395		39	248.16	22.89	0	13		44	87797351	87811091	LMO4	+
chr1	87800947	87801296	87801065		68	691.81	51.35	0	36		3601	87797464	87810698	LMO4	+
chr1	88928112	88928747	88928385		76	615.94	51.35	0	34		-221520	89149905	89301938	PKN2	+
chr1	89149688	89150116	89149975		34	255.41	33.45	0	19		70	89149905	89301938	PKN2	+
chr1	89990137	89990925	89990530		78	486.8	25.47	0	21		68	89990462	90058936	LRRC8B	+
chr1	90098238	90099263	90098605		180	1497.46	62.72	0	54		-135	90098740	90174207	LRRC8C	+
chr1	90286188	90287177	90286515		115	902	36.31	0	24		-89	90286604	90401559	LRRC8D	+
chr1	90308799	90309596	90308995		55	310.71	30.91	0	22		388	90308607	90398977	LRRC8D	+
chr1	90460396	90461025	90460805		52	410.83	33.26	0	16		109	90460696	90494097	ZNF326	+
chr1	91172452	91172789	91172635		18	102.38	17.85	0.21	12		10159	91177159	91182794	BARHL2	-
chr1	91183005	91183764	91183615		85	797.29	71.37	0	31		-821	91177159	91182794	BARHL2	-
chr1	91316236	91317058	91316625		42	190.68	19.07	0.04	13		67323	91382348	91383948	ZNF644	-
chr1	91317085	91317394	91317200		19	124.04	23.84	0.15	13		66748	91382348	91383948	ZNF644	-
chr1	91869869	91870508	91870105		57	333.66	25.31	0	22		187	91859730	91870292	HFM1	-
chr1	92350856	92351896	92351775		154	1063.58	38.49	0	41		-120	92325854	92351655	TGFBR3	-
chr1	92495266	92496092	92495525		115	818.93	44.72	0	42		-14	92495539	92529093	EPHX4	+
chr1	92764147	92764743	92764575		50	274.13	16.82	0	15		53	92764522	92853730	RPAP2	+
chr1	92950825	92951085	92951005		14	95.75	20.17	0.26	11		623	92940319	92951628	GFI1	-
chr1	92951265	92951624	92951525		19	111.26	14.26	0.16	10		103	92940319	92951628	GFI1	-
chr1	92952085	92952812	92952605		46	253.8	22.01	0	14		-172	92940321	92952433	GFI1	-
chr1	93250048	93250853	93250350		91	563.32	38.15	0	38		173	93202117	93250523	EVI5	-
chr1	93250892	93251241	93250985		36	218.77	24.65	0.03	23		-322	93169415	93250663	EVI5	-
chr1	93297376	93298099	93297685		46	297.17	21.13	0	12		19	93297666	93301959	RPL5	+
chr1	93426453	93427648	93427165		218	2546.87	114.21	0	47		-108	93307724	93427057	FAM69A	-
chr1	93645890	93646423	93646220		35	126.87	10.97	0.14	14		-53	93646273	93651955	CCDC18	+
chr1	93811056	93811915	93811365		83	684.58	60.57	0	32		-127	93811492	93826725	DR1	+
chr1	93914004	93914186	93914105		13	91.68	18.99	0.31	10		266	93913839	94020216	FNBP1L	+
chr1	94147062	94147583	94147375		55	333.53	30.32	0	31		-32997	94057863	94114378	BCAR3	-
chr1	94311649	94312450	94312190		98	979.95	64.24	0	25		-922	94185745	94311268	BCAR3	-
chr1	94374322	94375543	94375155		276	2956.64	130.63	0	84		-189	94350761	94374966	GCLM	-
chr1	94702598	94703535	94703155		216	2097.66	66.06	0	55		-34	94637307	94703121	ARHGAP29	-
chr1	94712777	94714003	94713385		230	2838.46	184.32	0	66		-10196	94667451	94703189	ARHGAP29	-
chr1	94883476	94884507	94883915		121	749.95	30.32	0	31		-96	94884011	94984219	ABCD3	+
chr1	95007272	95007693	95007455		25	119.97	13.62	0.16	11		-99	94994781	95007356	F3	-
chr1	95285616	95286275	95285835		54	310.71	31.37	0	28		-71	95285906	95360802	SLC44A3	+
chr1	95391822	95393192	95392675		115	666.29	35.21	0	27		60	95362509	95392735	CNN3	-
chr1	95582794	95583539	95582985		110	1105.22	64.02	0	31		-10	95582995	95639434	TMEM56	+
chr1	95699532	95699967	95699755		26	185.63	26.61	0.04	13		-12	95699767	95712779	RWDD3	+
chr1	97186924	97187538	97187255		86	721.09	58.2	0	42		34	97187221	97279267	PTBP2	+
chr1	98386353	98387178	98386655		77	591.25	51.06	0	29		-50	98185355	98386605	DPYD	-
chr1	98511638	98511883	98511790		19	166.09	30.32	0.06	14		-125185	98185355	98386605	DPYD	-
chr1	99126989	99127839	99127235		122	1066.14	63.09	0	42		-183	99127418	99226056	SNX7	+
chr1	99470074	99470846	99470315		43	176.57	12.48	0.05	11		134	99355803	99470449	RP11-254O21.1	-
chr1	99470074	99470846	99470670		43	176.57	12.48	0.05	11		-221	99355803	99470449	RP11-254O21.1	-
chr1	99729813	99730289	99730035		53	563.78	80.98	0	28		187	99729848	99775136	RP4-788L13.1	+
chr1	100111505	100111981	100111645		30	162.78	21	0.06	15		146	100111499	100160097	PALMD	+
chr1	100315475	100316019	100315825		41	239.7	17.61	0	14		185	100315640	100389576	AGL	+
chr1	100435350	100435827	100435600		44	191.7	18.94	0.04	27		65	100435535	100477089	SLC35A3	+
chr1	100435860	100436272	100436060		26	118.97	15.41	0.17	14		-33	100436093	100489006	SLC35A3	+
chr1	100503339	100503950	100503670		43	250.52	20.2	0	15		17	100503653	100548933	HIAT1	+
chr1	100817975	100818594	100818285		44	310.57	29.11	0	16		129	100818156	100985833	CDC14A	+
chr1	101004813	101005610	101005350		131	1216.72	61.62	0	41		893	101004457	101005755	GPR88	+
chr1	101361191	101361743	101361580		37	284.36	26.41	0	12		-52	101361632	101447309	SLC30A7	+
chr1	105520435	105520758	105520630		18	55.84	9.98	1.77	14		1227602	104293028	104301312	AMY1C	+
chr1	106250328	106250438	106250390		13	85.44	6.35	0.38	13		-1348911	107599301	107601916	PRMT6	+
chr1	107683812	107684417	107684015		63	629.62	85.28	0	31		24	107683991	107691429	NTNG1	+
chr1	108507326	108508029	108507775		55	281.27	22.72	0	21		-230	108212006	108507545	VAV3	-
chr1	108742419	108743226	108742955		110	716.39	32.01	0	34		-57	108677442	108742898	SLC25A24	-
chr1	109102391	109103341	109102685		78	591.65	41.08	0	19		-286	109102971	109173747	FAM102B	+
chr1	109289161	109289883	109289655		45	162.05	11.44	0.06	13		345	109289310	109352148	STXBP3	+
chr1	109419387	109420033	109419695		52	382.67	31.69	0	18		92	109419603	109473043	GPSM2	+
chr1	109505662	109506335	109505875		149	1225.59	43.23	0	51		197	109472561	109506072	CLCC1	-
chr1	109584231	109584846	109584580		39	126.91	8.52	0.14	11		117	109512836	109584697	WDR47	-
chr1	109597633	109597760	109597700		14	60.48	5.26	1.43	14		-12850	109512840	109584850	WDR47	-
chr1	109618444	109618748	109618675		21	179.59	26.17	0.04	11		-82	109605121	109618593	TAF13	-
chr1	109642655	109643516	109642905		105	786.66	41.74	0	32		8265	109648594	109651170	C1orf194	-
chr1	109791999	109792830	109792215		96	697.97	37.54	0	29		-426	109792641	109818372	CELSR2	+
chr1	109939972	109940946	109940535		145	863.53	25.75	0	36		-52	109912152	109940483	SORT1	-
chr1	110008921	110009711	110009495		72	524.86	39.3	0	24		245	110009250	110024759	SYPL2	+
chr1	110026378	110026720	110026565		29	217.33	36.97	0.03	21		4	110026561	110035356	ATXN7L2	+
chr1	110036514	110036876	110036675		21	122.43	14.67	0.16	10		-26	110036701	110041477	CYB561D1	+
chr1	110052079	110052538	110052390		48	370.36	38.15	0	25		-86	110046797	110052304	AMIGO1	-
chr1	110452924	110454109	110453235		115	1025.36	45.15	0	19		-286	110453521	110469365	CSF1	+
chr1	110527226	110527876	110527435		44	195.57	12.72	0.03	13		-202	110527637	110558153	AHCYL1	+
chr1	110527226	110527876	110527665		44	195.57	12.72	0.03	13		28	110527637	110558153	AHCYL1	+
chr1	110752430	110753896	110752775		357	3100	75.46	0	59		-1190	110753965	110776666	KCNC4	+
chr1	110754111	110754636	110754375		27	145.2	16.98	0.11	11		253	110754122	110766656	AL137790.1	+
chr1	110880806	110881434	110881130		60	260.08	13.84	0	20		2	110881128	110889299	RBM15	+
chr1	111000613	111000867	111000690		21	168.72	35.21	0.06	20		1563	110999127	110999976	PROK1	+
chr1	111149576	111150095	111149780		40	268.72	27.47	0	18		271	111144633	111150051	KCNA2	-
chr1	111161999	111162324	111162190		14	69.21	14.35	0.81	10		11906	111136202	111174096	KCNA2	-
chr1	112162223	112162946	112162455		75	682.21	66.56	0	31		50	112162405	112259313	RAP1A	+
chr1	112281025	112282429	112282215		138	884.82	49.47	0	40		-193	112265724	112282022	C1orf183	-
chr1	112282875	112283290	112283075		34	251.56	29.9	0	18		-1053	112265724	112282022	C1orf183	-
chr1	112297951	112298451	112298235		38	224.76	26.41	0.03	21		16	112298219	112310199	DDX20	+
chr1	112532142	112532543	112532420		47	288.54	19.46	0	21		-643	112318431	112531777	KCND3	-
chr1	113051245	113051836	113051365		38	172.9	16.68	0.07	16		-35	113051400	113065288	WNT2B	+
chr1	113162268	113162556	113162365		15	98.03	17.97	0.25	10		53	113153280	113162418	ST7L	-
chr1	113217597	113218061	113217870		24	119.97	13.65	0.16	10		503	113217367	113243332	MOV10	+
chr1	113249404	113250196	113249725		53	179.14	13.19	0.04	17		79	113243728	113249804	RHOC	-
chr1	113261409	113261802	113261575		18	55.84	8.67	1.77	10		-1466	113263041	113269857	FAM19A3	+
chr1	113497854	113498279	113498120		22	80.64	10.31	0.44	10		683	113471670	113498803	SLC16A1	-
chr1	113498317	113499460	113499005		340	3085	102.44	0	128		-202	113471670	113498803	SLC16A1	-
chr1	113615689	113615991	113615855		23	143.28	20.12	0.12	15		24	113615831	113667824	LRIG2	+
chr1	113932574	113933379	113933045		53	369.1	31.3	0	16		-326	113933371	114225056	MAGI3	+
chr1	114301434	114302419	114301705		76	421.59	24.8	0	18		75	114280748	114301780	PHTF1	-
chr1	114355083	114355385	114355230		18	149.7	25.15	0.07	10		-160	114304455	114355070	RSBN1	-
chr1	114447362	114448155	114447575		70	370.59	19.56	0	19		-188	114447763	114456708	DCLRE1B	+
chr1	114471975	114472947	114472295		88	656.36	58.69	0	33		-82	114472377	114516193	HIPK1	+
chr1	114695181	114695604	114695465		38	302.36	29.93	0	16		17	114680646	114695482	SYT6	-
chr1	115053025	115054056	115053875		162	1365.11	60.37	0	47		70375	115110505	115124250	BCAS2	-
chr1	115632044	115632339	115632265		15	95.3	17.61	0.26	10		-144	115592977	115632121	TSPAN2	-
chr1	115879818	115879927	115879880		17	67.15	4.12	0.93	17		977	115828539	115880857	NGF	-
chr1	116184254	116185642	116185100		146	1177.15	48.91	0	27		-150	116185250	116234475	VANGL1	+
chr1	116380352	116380992	116380535		71	627.71	39.5	0	20		2798	116378998	116383333	NHLH2	-
chr1	116381022	116381402	116381165		41	421.77	64.23	0	23		2168	116378998	116383333	NHLH2	-
chr1	116381707	116382185	116381950		29	199.52	23.19	0.03	10		1383	116378998	116383333	NHLH2	-
chr1	116518722	116519641	116519035		72	502.99	29.93	0	16		-200	116519235	116574511	SLC22A15	+
chr1	116915315	116916694	116915920		204	1778.86	115.91	0	77		29	116915891	116928766	ATP1A1	+
chr1	117112440	117113976	117113765		158	894.93	27.39	0	28		-159	117057361	117113606	CD58	-
chr1	117210020	117210628	117210315		93	842.97	54.29	0	38		-1	117117031	117210314	IGSF3	-
chr1	117368514	117368915	117368700		21	127.52	18.99	0.14	11		71611	117297089	117297643	CD2	+
chr1	117452450	117453201	117452715		45	230.3	17.21	0.02	13		36	117452679	117532980	PTGFRN	+
chr1	117664239	117664473	117664355		15	99.51	19.37	0.24	11		29	117653682	117664384	TRIM45	-
chr1	117909168	117910422	117909425		187	1429.9	53.92	0	47		-646	117910071	118071494	MAN1A2	+
chr1	118148509	118148736	118148675		13	61.56	12.04	1.35	12		119	118148556	118170994	FAM46C	+
chr1	118148962	118149303	118149230		22	155	19.76	0.07	11		674	118148556	118170994	FAM46C	+
chr1	119870021	119870642	119870395		69	635.57	65.51	0	32		-41004	119911399	119936751	HAO2	+
chr1	120190243	120191288	120190795		148	1486.74	130.98	0	61		-405	120162000	120190390	ZNF697	-
chr1	120254995	120255286	120255085		16	83.94	16.35	0.39	14		556	120254529	120272694	PHGDH	+
chr1	120255315	120255630	120255435		31	278.64	33.01	0	14		906	120254529	120272694	PHGDH	+
chr1	120601900	120602424	120601975		28	72.89	8.07	0.64	11		10291	120539296	120612266	NOTCH2	-
chr1	120611156	120612817	120612315		146	428.6	14.31	0	26		-49	120539296	120612266	NOTCH2	-
chr1	120835867	120836440	120836055		44	249.76	35.21	0	27		-1217	120837272	120854844	FAM72B	+
chr1	120836452	120836900	120836675		23	92.59	17.61	0.29	15		-597	120837272	120854844	FAM72B	+
chr1	120837625	120838147	120837915		46	238.89	24.86	0	27		159	120837756	120838678	FAM72B	+
chr1	121260693	121261537	121261335		48	287.88	17.61	0	10		-325398	120926979	120935937	FCGR1B	-
chr1	121282553	121282701	121282630		10	70.9	13.12	0.78	10		-346693	120926979	120935937	FCGR1B	-
chr1	121483716	121485484	121485165		2967	65.52	2.42	1.06	322		-549228	120926979	120935937	FCGR1B	-
chr1	143743282	143744005	143743455		95	664.51	49.93	0	47		24426	143767144	143767881	PPIAL4G	-
chr1	143744357	143745019	143744805		66	552.76	50.58	0	26		23076	143767144	143767881	PPIAL4G	-
chr1	143913942	143914538	143914235		60	289.89	20.27	0	27		30	143896452	143914265	FAM72D	-
chr1	143914654	143914956	143914860		20	111.26	22.67	0.16	17		-595	143896452	143914265	FAM72D	-
chr1	143915018	143915776	143915405		61	390.16	35.21	0	23		-1140	143896452	143914265	FAM72D	-
chr1	143915797	143916299	143916045		106	962.09	68.63	0	59		-1780	143896452	143914265	FAM72D	-
chr1	144339911	144340317	144340135		27	178.73	23.29	0.05	13		24457	144360739	144364592	PPIAL4B	-
chr1	144340781	144341433	144341145		72	640.42	65.15	0	34		23447	144360739	144364592	PPIAL4B	-
chr1	144519785	144520203	144520015		36	288.18	33.2	0	18		-155423	144360739	144364592	PPIAL4B	-
chr1	144520299	144520650	144520465		20	157.64	33.51	0.06	12		-155873	144360739	144364592	PPIAL4B	-
chr1	144521129	144521518	144521335		47	342.97	22.89	0	20		-156743	144360739	144364592	PPIAL4B	-
chr1	144593506	144594323	144593875		89	460.24	26.4	0	32		-217869	144811744	144830301	NBPF9	+
chr1	144594973	144595256	144595175		15	54.23	8.33	1.93	10		-216569	144811744	144830301	NBPF9	+
chr1	144931446	144932700	144932035		295	2794.59	92.43	0	83		507	144917502	144932542	PDE4DIP	-
chr1	145039302	145040280	145039935		294	1911.83	58.27	0	138		7	144994633	145039942	PDE4DIP	-
chr1	145075097	145076122	145075545		87	209.31	7.88	0.03	17		398	145074846	145075943	PDE4DIP	-
chr1	145092498	145092849	145092605		33	192.47	22.5	0.04	23		-3615	145096220	145116922	SEC22B	+
chr1	145139330	145140089	145139820		108	753.5	26.76	0	27		43289	145096531	145100984	SEC22B	+
chr1	145173345	145173612	145173430		11	55.79	14.43	1.78	10		-35689	145209119	145291654	NOTCH2NL	+
chr1	145208560	145210171	145209095		129	520.58	20.03	0	23		-50	145209145	145319796	AL592307.2	+
chr1	145219018	145219424	145219270		25	128.22	21.5	0.14	17		-5327	145224597	145285911	NOTCH2NL	+
chr1	145472829	145473171	145473040		18	100.34	19.07	0.23	12		2532	145470508	145475646	ANKRD34A	+
chr1	145476989	145477665	145477185		95	814.58	41.08	0	27		26	145477159	145501669	LIX1L	+
chr1	145575034	145575495	145575285		38	205.19	24.4	0.03	24		52	145575233	145580322	PIAS3	+
chr1	145575741	145576110	145575875		20	116.08	15.44	0.16	10		-113	145575988	145578616	PIAS3	+
chr1	145610922	145611409	145611150		81	827.79	84.51	0	47		100	145611050	145687091	RNF115	+
chr1	146373376	146373654	146373515		16	106.09	20.32	0.2	12		-31	146373546	146400301	NBPF12	+
chr1	146643527	146644542	146643685		76	658.43	50.27	0	17		364	146630685	146644049	PRKAB2	-
chr1	146714082	146714909	146714225		52	283.15	18.95	0	12		-171	146714396	146731700	CHD1L	+
chr1	146714082	146714909	146714730		52	283.15	18.95	0	12		334	146714396	146731700	CHD1L	+
chr1	147071561	147072259	147072015		104	1046.06	65.64	0	31		27	147071988	147083492	BCL9	+
chr1	147807127	147807429	147807215		16	77.13	17.34	0.51	12		148162	147954635	147955377	PPIAL4A	-
chr1	147931231	147931512	147931310		36	179.29	14.9	0.04	23		24067	147954635	147955377	PPIAL4A	-
chr1	147932093	147932597	147932305		61	666.84	64.23	0	22		23072	147954635	147955377	PPIAL4A	-
chr1	148176143	148176755	148176495		73	788.57	61.44	0	21		85809	148251557	148262304	NBPF10	-
chr1	148193151	148193500	148193325		41	422.84	64.24	0	27		68979	148251557	148262304	NBPF10	-
chr1	148247302	148248194	148247415		45	99.23	8.07	0.25	11		14889	148251557	148262304	NBPF10	-
chr1	148555862	148556813	148556275		113	393.3	13.44	0	29		180	148556095	148577660	NBPF15	+
chr1	148845958	148846233	148846165		13	60.51	11.9	1.43	10		106430	148739735	148758201	NBPF16	+
chr1	148895983	148896323	148896155		20	52.83	6.6	2.05	11		156420	148739735	148758201	NBPF16	+
chr1	148928060	148928452	148928305		31	71.88	6.49	0.65	15		188570	148739735	148758201	NBPF16	+
chr1	149379528	149379758	149379675		14	109.09	24.4	0.17	11		20867	149398877	149400542	HIST2H3PS2	-
chr1	149575812	149577634	149577425		300	2096.01	50.18	0	57		24768	149552657	149556510	PPIAL4C	+
chr1	149823250	149823542	149823405		15	84.81	16.14	0.38	10		762	149822643	149823191	HIST2H2AA4	+
chr1	149982336	149982971	149982790		48	247.57	29.11	0	26		-165	149912231	149982625	OTUD7B	-
chr1	150121800	150123002	150122265		134	1240.54	68.23	0	31		95	150122170	150132260	PLEKHO1	+
chr1	150135583	150135727	150135660		12	112.83	19.56	0.16	12		6449	150129211	150131181	PLEKHO1	+
chr1	150208244	150208550	150208400		19	143.69	28.66	0.1	14		33	150192694	150208433	ANP32E	-
chr1	150293730	150294156	150293935		23	163.61	37.41	0.06	17		7	150293928	150325703	PRPF3	+
chr1	150336860	150337375	150337180		31	199.58	22.89	0.03	12		54	150337126	150449042	RPRD2	+
chr1	150487862	150488408	150488120		46	409.3	45.75	0	18		6342	150481778	150482628	ECM1	+
chr1	150521201	150522042	150521875		79	458.98	14.82	0	14		-9	150521884	150531224	ADAMTSL4	+
chr1	150946609	150947647	150947255		113	961.79	44.95	0	24		47	150939543	150947302	LASS2	-
chr1	151031772	151032293	151032135		49	414.52	48.91	0	25		-85	151024590	151032050	CDC42SE1	-
chr1	151430975	151431678	151431255		122	1298.87	86.12	0	45		400	151413319	151431655	POGZ	-
chr1	151512621	151512885	151512805		15	113.16	20.96	0.16	10		24	151512781	151556059	TUFT1	+
chr1	151584421	151585022	151584605		61	566.45	65.46	0	28		47	151584558	151671567	SNX27	+
chr1	151648697	151648846	151648775		14	73.06	8.8	0.62	14		14055	151634720	151641837	SNX27	+
chr1	151762672	151763129	151762915		32	242.82	32.26	0	16		33	151752219	151762948	TDRKH	-
chr1	151881637	151882241	151881915		129	1287.35	71.9	0	54		63	151846531	151881978	THEM4	-
chr1	151965892	151966701	151966295		138	1180.96	61.8	0	50		5	151955708	151966300	S100A10	-
chr1	152009299	152009678	152009515		35	287.47	43.04	0	21		-4	152004982	152009511	S100A11	-
chr1	152083534	152084887	152084615		144	759.02	24.69	0	29		1941	152078793	152086556	TCHH	-
chr1	153651339	153651827	153651685		34	212.14	20.54	0.03	14		572	153651113	153665775	NPR1	+
chr1	153747559	153748888	153748605		169	1540.62	65.56	0	34		32	153748573	153751133	SLC27A3	+
chr1	153755829	153756406	153756235		43	337.25	41.92	0	20		4558	153751677	153752600	SLC27A3	+
chr1	153894777	153895614	153895420		119	895.34	64.92	0	56		31	153777201	153895451	GATAD2B	-
chr1	153918248	153919394	153918505		136	921.11	40.72	0	37		-2948	153914755	153915557	DENND4B	-
chr1	153939503	153940301	153939755		108	901.54	71.75	0	50		-255	153940010	153941444	CREB3L4	+
chr1	154192974	154193685	154193225		54	363.05	25.61	0	16		-100	154193325	154243328	UBAP2L	+
chr1	154300887	154301541	154301235		54	300.84	25.31	0	23		-40	154301275	154314264	ATP8B2	+
chr1	154377585	154378359	154378165		72	564.17	36.97	0	21		74	154378091	154407059	IL6R	+
chr1	154531066	154531649	154531485		58	400.15	28.28	0	23		19	154524858	154531504	UBE2Q1	-
chr1	154540307	154540716	154540470		38	147.52	12.03	0.09	19		213	154540257	154552502	CHRNB2	+
chr1	154580170	154580691	154580535		27	181.58	23.62	0.04	11		19853	154574554	154600388	ADAR	-
chr1	154934350	154934710	154934495		22	96.27	13.77	0.26	12		17	154931216	154934512	PYGO2	-
chr1	154974154	154974416	154974305		18	74.27	9.26	0.57	12		-828	154975133	154990998	ZBTB7B	+
chr1	154976350	154976543	154976430		12	97.5	22.52	0.25	11		1109	154975321	154987195	ZBTB7B	+
chr1	154989725	154990423	154990015		96	899.94	65.14	0	37		3091	154986924	154989457	ZBTB7B	+
chr1	155022883	155024043	155023155		280	2487.07	67.83	0	72		-48	155023203	155028622	ADAM15	+
chr1	155043293	155043984	155043605		52	357.75	44.02	0	24		7305	155036300	155060004	EFNA3	+
chr1	155050985	155051617	155051440		55	317.32	26.41	0	24		92	155051348	155060014	EFNA3	+
chr1	155052099	155052834	155052395		141	1307.82	67.91	0	53		1047	155051348	155060004	EFNA3	+
chr1	155053170	155053687	155053355		29	130.75	11.4	0.13	10		2007	155051348	155060004	EFNA3	+
chr1	155054288	155054865	155054465		32	154.44	16.54	0.07	13		3117	155051348	155060004	EFNA3	+
chr1	155057538	155058083	155057725		32	179.09	14.67	0.04	10		-267	155057992	155059458	EFNA3	+
chr1	155098409	155100590	155098760		154	705.64	22.01	0	20		-1176	155099936	155107333	EFNA1	+
chr1	155108140	155108571	155108330		34	142.45	15.21	0.12	20		-13	155108343	155110916	RAG1AP1	+
chr1	155164130	155164927	155164295		118	863.3	33.12	0	34		1938	155165379	155166233	THBS3	-
chr1	155178327	155178707	155178530		25	139.7	20.12	0.11	16		40	155178490	155183614	MTX1	+
chr1	155197068	155197432	155197285		16	94.62	21.47	0.29	10		8341	155204244	155205626	GBA	-
chr1	155214268	155214646	155214435		20	87.93	11	0.35	10		-8	155208004	155214427	GBA	-
chr1	155225074	155225460	155225205		30	162.78	15.9	0.06	14		69	155222540	155225274	FAM189B	-
chr1	155243087	155243518	155243335		23	164.91	29.34	0.06	12		-54	155234067	155243281	CLK2	-
chr1	155247110	155247615	155247245		62	513.08	39.61	0	27		-129	155247374	155259639	HCN3	+
chr1	155292802	155293795	155292955		63	277.02	14.31	0	13		-361	155293316	155296819	RUSC1	+
chr1	155294045	155294597	155294285		37	238.41	32.45	0	19		-33	155294318	155296521	RUSC1	+
chr1	155532006	155532879	155532435		171	1405.84	50.97	0	53		-47561	155579996	155582107	MSTO1	+
chr1	155532883	155533401	155533025		37	133.05	13.61	0.13	17		-46971	155579996	155582107	MSTO1	+
chr1	155657951	155659047	155658265		153	996.38	27.29	0	30		231	155642432	155658496	YY1AP1	-
chr1	155715177	155715712	155715595		29	84.57	11.2	0.38	13		6398	155719733	155721993	GON4L	-
chr1	156023346	156023963	156023535		58	520.94	85.65	0	36		-19	156005093	156023516	UBQLN4	-
chr1	156076097	156076522	156076295		58	606.01	83.63	0	37		-154	156076449	156084629	LMNA	+
chr1	156084338	156085214	156084575		54	210.43	15.65	0.03	16		62	156084513	156109108	LMNA	+
chr1	156093579	156093764	156093690		16	96.71	12.72	0.26	13		757	156092933	156104319	LMNA	+
chr1	156115694	156115973	156115870		12	74.28	18.73	0.57	10		-1287	156117157	156131289	SEMA4A	+
chr1	156308143	156308365	156308285		25	168.57	19.63	0.06	20		-13	156308298	156316784	C1orf182	+
chr1	156338804	156339175	156339060		21	96.27	13.1	0.26	12		57	156339003	156355011	RHBG	+
chr1	156427044	156427717	156427185		50	395.93	46.46	0	19		22387	156446721	156449572	MEF2D	-
chr1	156470649	156471267	156470975		86	883.47	97.3	0	40		-404	156453053	156470571	MEF2D	-
chr1	156561450	156561850	156561545		21	114.15	17.61	0.16	12		-139	156561684	156562816	APOA1BP	+
chr1	156594048	156594647	156594495		51	193.64	13.2	0.03	19		639	156593856	156595327	HAPLN2	+
chr1	156594693	156595158	156594925		30	138.45	12.1	0.12	11		1069	156593856	156595327	HAPLN2	+
chr1	156629799	156630526	156630175		36	68.85	5.13	0.83	11		3654	156626521	156629324	BCAN	+
chr1	156675575	156676325	156675975		31	123.13	18.18	0.16	11		-367	156670667	156675608	CRABP2	-
chr1	156720743	156722031	156721405		189	1371.94	51.58	0	50		-69	156713501	156721336	HDGF	-
chr1	156830525	156830993	156830735		60	508	44.02	0	30		64	156830671	156851642	NTRK1	+
chr1	156890174	156890478	156890280		14	100.32	23.17	0.23	10		-162	156890442	156902886	C1orf92	+
chr1	156897241	156897848	156897655		32	100.98	11.6	0.21	11		501	156897154	156902877	C1orf92	+
chr1	157015159	157016321	157015565		277	2640.96	74.83	0	67		-73948	156937703	156941617	ARHGEF11	-
chr1	157107935	157108735	157108405		130	1409.51	120.24	0	56		-139	157102937	157108266	ETV3	-
chr1	157963233	157963822	157963425		41	323.43	54.54	0	21		25	157963400	158065443	KIRREL	+
chr1	158083038	158083656	158083515		62	508.15	40.5	0	23		27045	158056470	158070052	KIRREL	+
chr1	158147398	158147856	158147625		47	486.35	86.57	0	31		-2112	158149737	158154686	CD1D	+
chr1	158150612	158151044	158150835		20	147.93	32.01	0.08	12		1098	158149737	158154686	CD1D	+
chr1	159824394	159825006	159824715		123	1342.21	73.95	0	42		-22	159805140	159824693	C1orf204	-
chr1	159894118	159894715	159894475		80	782.14	98.27	0	48		-134	159888567	159894341	TAGLN2	-
chr1	159895070	159895527	159895290		24	160.08	28.66	0.06	12		-9	159888541	159895281	TAGLN2	-
chr1	160175074	160175738	160175180		58	509.97	51.35	0	20		-31	160175211	160185166	PEA15	+
chr1	160232029	160232397	160232255		25	119.97	18.41	0.16	17		-29	160209012	160232226	DCAF8	-
chr1	161087602	161087993	161087800		21	148.39	23.62	0.08	10		45	161070346	161087845	PFDN2	-
chr1	161102287	161102572	161102440		17	107.05	21.13	0.19	11		17	161092116	161102457	DEDD	-
chr1	161136211	161136448	161136345		13	88.13	20.95	0.35	10		57	161136288	161146882	PPOX	+
chr1	161168020	161168524	161168430		30	171.78	14.82	0.06	10		413	161165769	161168843	ADAMTS4	-
chr1	161409669	161411835	161410735		258	807.46	14.41	0	34		-64485	161475220	161489358	FCGR2A	+
chr1	161411875	161412596	161412105		54	89.54	4.77	0.35	13		-63115	161475220	161489358	FCGR2A	+
chr1	161412740	161413330	161413045		64	124.01	6.43	0.15	20		-62175	161475220	161489358	FCGR2A	+
chr1	161416224	161420011	161417275		542	1666.14	17.55	0	49		-57945	161475220	161489358	FCGR2A	+
chr1	161420119	161420960	161420625		76	93.55	5.4	0.28	20		-54595	161475220	161489358	FCGR2A	+
chr1	161423911	161427407	161424665		556	1573.45	15.85	0	54		-50555	161475220	161489358	FCGR2A	+
chr1	161427567	161428312	161428075		65	103.52	7.55	0.2	23		-47145	161475220	161489358	FCGR2A	+
chr1	161431268	161433718	161432055		478	1740.96	15.8	0	52		-43165	161475220	161489358	FCGR2A	+
chr1	161434915	161435680	161435445		68	102.97	7.06	0.21	22		-39775	161475220	161489358	FCGR2A	+
chr1	161438453	161442211	161439415		563	1650.26	19.6	0	59		-35805	161475220	161489358	FCGR2A	+
chr1	161695665	161695860	161695805		12	72.22	12.58	0.64	10		114	161695691	161697932	FCRLB	+
chr1	161696053	161697336	161696775		107	617.39	28.93	0	23		1084	161695691	161697932	FCRLB	+
chr1	161719809	161720181	161720045		24	109.7	11.74	0.16	12		450	161719595	161721571	DUSP12	+
chr1	161993293	161993874	161993595		47	130.71	8.2	0.13	16		49	161952983	161993644	OLFML2B	-
chr1	162039221	162040036	162039805		144	809.06	20.45	0	36		239	162039566	162340265	NOS1AP	+
chr1	162530971	162531955	162531695		207	1974.58	55.74	0	45		183	162531512	162532334	UAP1	+
chr1	162792121	162792378	162792280		12	52.76	11	2.06	10		19572	162772708	162774109	HSD17B7	+
chr1	164581071	164581264	164581190		15	139.79	32.43	0.11	14		6760	164574430	164816308	PBX1	+
chr1	165414189	165414568	165414405		25	220.49	52.27	0.03	18		4	165406165	165414409	RXRG	-
chr1	165796588	165797472	165797025		166	1265.46	39.82	0	45		133	165796892	165877276	UCK2	+
chr1	165797499	165797860	165797635		20	61.74	7.97	1.31	10		743	165796892	165877276	UCK2	+
chr1	166135760	166136261	166135995		41	278.37	26.41	0	18		-43	166039256	166135952	FAM78B	-
chr1	166808299	166809053	166808625		113	1009.51	41.08	0	28		-59	166808684	166818445	POGK	+
chr1	166809099	166809364	166809240		28	266.63	46.33	0	19		-86	166809326	166823710	POGK	+
chr1	166944407	166945295	166944745		109	884.8	41.08	0	28		-184	166887996	166944561	ILDR2	-
chr1	167190162	167191050	167190490		67	271.31	22.61	0	26		355	167190135	167385317	POU2F1	+
chr1	167191059	167191372	167191185		20	129.97	22.89	0.13	12		1050	167190135	167385317	POU2F1	+
chr1	167312691	167312922	167312875		17	93.73	15.32	0.28	15		-13822	167326697	167356484	POU2F1	+
chr1	167423871	167425007	167424305		68	283.92	18.71	0	17		-15428	167400410	167408877	CD247	-
chr1	167522480	167523045	167522805		32	180.92	16.61	0.04	10		199	167510250	167523004	CREG1	-
chr1	167522480	167523045	167522925		32	180.92	16.61	0.04	10		79	167510250	167523004	CREG1	-
chr1	167683432	167683903	167683745		33	162.6	15.58	0.06	14		-6684	167690429	167691251	MPZL1	+
chr1	167690938	167691469	167691055		40	213.38	16.51	0.03	15		-132	167691187	167735133	MPZL1	+
chr1	167789324	167789682	167789555		29	184.87	19.14	0.04	15		14141	167778838	167803696	ADCY10	-
chr1	167905017	167905544	167905300		35	236.77	28.17	0.02	16		-22	167885967	167905278	BRP44	-
chr1	167905777	167906512	167906025		40	114.1	12	0.16	15		-31	167906056	168032917	DCAF6	+
chr1	167954354	167954618	167954455		15	90.9	17.61	0.32	12		16727	167937728	167960577	DCAF6	+
chr1	168025374	168025771	168025625		27	115.66	14.89	0.16	17		11306	168014319	168033205	DCAF6	+
chr1	168105760	168106321	168106035		41	347.46	49.47	0	20		501	168054516	168106536	GPR161	-
chr1	168147991	168148536	168148455		32	180.92	20.83	0.04	13		162	168148293	168161633	TIPRL	+
chr1	168194931	168195600	168195235		63	315.07	23.59	0	28		-20	168195255	168212087	SFT2D2	+
chr1	168582830	168583109	168583040		16	126.92	32.43	0.14	14		37329	168545711	168551315	XCL1	+
chr1	169074881	169076492	169075955		200	1259.84	40.68	0	42		397	169075558	169101960	ATP1B1	+
chr1	169454471	169455200	169454970		54	415.5	48.65	0	21		176	169433147	169455146	SLC19A2	-
chr1	169455206	169455616	169455465		41	335.39	34.37	0	19		85	169455380	169456846	Z99572.1	+
chr1	171294907	171295005	171294960		11	193.88	23.62	0.03	11		2715	171292245	171302286	FMO4	+
chr1	171710909	171711595	171711190		46	148.32	17.61	0.08	24		24	171673090	171711214	VAMP4	-
chr1	171750366	171750808	171750540		28	192.49	22.01	0.04	11		-248	171750788	171766101	METTL13	+
chr1	171810114	171810946	171810710		63	387.63	26.41	0	17		89	171810621	172381856	DNM3	+
chr1	172501819	172502625	172502295		184	1926.96	72.46	0	51		35	172502260	172580971	C1orf9	+
chr1	173445762	173447218	173446265		141	805.8	32.07	0	30		-227	173446492	173457150	PRDX6	+
chr1	173803804	173803936	173803870		12	61.71	7.03	1.31	12		-6181	173810051	173826976	DARS2	+
chr1	173837398	173838033	173837830		46	278.9	34.99	0	25		298	173837532	173842781	ZBTB37	+
chr1	173990865	173991819	173991260		71	458.35	25.22	0	15		208	173907552	173991468	RC3H1	-
chr1	174128262	174129719	174128485		202	1707.77	61.62	0	41		-243	174128728	174363283	RABGAP1L	+
chr1	174768658	174769324	174768955		52	398.73	31.32	0	16		-115	174769070	174964445	RABGAP1L	+
chr1	174968991	174969592	174969160		149	1944.67	147.51	0	61		-157	174969317	174975907	CACYBP	+
chr1	175161825	175162259	175162035		25	182.88	35.21	0.04	16		125041	175036994	175117202	TNN	+
chr1	176175715	176176620	176176405		83	445.04	25.92	0	25		-186	176104146	176176219	RFWD2	-
chr1	176359569	176359823	176359645		11	78.12	22.45	0.5	10		-72662	176432307	176814735	PAPPA2	+
chr1	178007008	178007314	178007235		16	102.38	19.37	0.21	11		-153	177991546	178007082	SEC16B	-
chr1	178062670	178063872	178062935		140	1117.27	40.85	0	26		-341	178063276	178442557	RASAL2	+
chr1	178062670	178063872	178063555		140	1117.27	40.85	0	26		279	178063276	178442557	RASAL2	+
chr1	178511607	178511979	178511815		16	101.04	25.15	0.21	12		-72	178511887	178514635	C1orf220	+
chr1	178512003	178512439	178512260		32	171.78	17.95	0.06	14		329	178511931	178518024	C1orf220	+
chr1	178693963	178694958	178694430		120	885.71	30.06	0	24		3	178694427	178887143	RALGPS2	+
chr1	178994785	178995834	178995320		122	884.16	40.24	0	30		289	178995031	179045697	FAM20B	+
chr1	179051053	179051806	179051135		59	480.15	42.04	0	18		-181	179051316	179063270	TOR3A	+
chr1	179262563	179263344	179262920		74	374.48	21.51	0	25		-17	179262937	179327815	SOAT1	+
chr1	179555352	179555882	179555645		45	321.28	29.61	0	18		-5103	179560748	179660405	TDRD5	+
chr1	179850954	179851899	179851500		85	525.29	37.73	0	29		80	179851420	179889211	TOR1AIP1	+
chr1	179923780	179924140	179923905		38	236.28	28.37	0.02	28		-3	179923908	179989970	CEP350	+
chr1	180123639	180124302	180124055		80	517.09	34.1	0	35		86	180123969	180173165	QSOX1	+
chr1	180198318	180199974	180198615		105	554.08	18.46	0	12		-827	180199442	180244188	LHX4	+
chr1	180471230	180472052	180471750		131	1408.19	145.25	0	65		339	180257365	180472089	ACBD6	-
chr1	180991619	180992188	180991985		50	349.48	35.21	0	24		62	180941861	180992047	STX6	-
chr1	181074327	181075015	181074445		80	772.61	59.42	0	27		16807	181057638	181059977	IER5	+
chr1	181998929	181999377	181999080		33	268.74	35.21	0	15		31767	182023705	182030847	ZNF648	-
chr1	182360544	182361353	182360660		58	281.27	20.2	0	17		265	182354834	182360925	GLUL	-
chr1	182573282	182573825	182573425		58	604.43	58.64	0	21		118	182567758	182573543	RGS16	-
chr1	182584023	182584577	182584280		56	571.32	72.61	0	25		-10737	182567758	182573543	RGS16	-
chr1	182758429	182759184	182758955		63	514.1	68.23	0	31		83	182758872	182796155	NPL	+
chr1	182808253	182809013	182808780		74	735.47	75.4	0	27		276	182808504	182856886	DHX9	+
chr1	182911373	182911690	182911575		30	308.41	61.44	0	22		9544	182869001	182921119	C1orf14	-
chr1	182991941	182993495	182992425		186	1473.89	51.35	0	35		-172	182992597	183114727	LAMC1	+
chr1	183125713	183125917	183125765		12	54.21	9.02	1.91	10		21940	183103825	183107040	LAMC1	+
chr1	183300692	183300936	183300790		15	136.74	27.93	0.12	10		-26781	183217372	183274009	NMNAT2	-
chr1	183440301	183440795	183440495		30	113.93	10.46	0.16	12		-1118	183441613	183523328	SMG7	+
chr1	183774062	183774495	183774305		58	649.02	82.7	0	30		51	183774254	183897665	RGL1	+
chr1	184005386	184006849	184006715		97	484.84	20.62	0	16		-14096	184020811	184043346	TSEN15	+
chr1	184020639	184021126	184020865		27	145.2	21.48	0.11	16		-2	184020867	184039946	TSEN15	+
chr1	184355521	184356519	184356035		135	1143.58	41.04	0	27		-157	184356192	184598154	C1orf21	+
chr1	184591249	184591644	184591510		23	170.79	24.21	0.06	11		31628	184559882	184568743	C1orf21	+
chr1	184942906	184943593	184943185		43	250.52	22.71	0	15		-71311	185014496	185071740	RNF2	+
chr1	185014188	185015023	185014545		106	798.02	46.61	0	37		-113	185014658	185070189	RNF2	+
chr1	185286145	185286512	185286395		63	621.51	69.65	0	43		66	185275749	185286461	IVNS1ABP	-
chr1	185703432	185703754	185703585		28	279.18	50.27	0	18		-98	185703683	186160081	HMCN1	+
chr1	186649259	186649531	186649460		19	158.94	30.81	0.06	14		95	186640923	186649555	PTGS2	-
chr1	187335070	187335165	187335120		11	118.8	9.3	0.17	11		511633	186823487	186839875	PLA2G4A	+
chr1	192764949	192765201	192765025		12	99.84	30.72	0.24	11		-13144	192778169	192780029	RGS2	+
chr1	192777672	192778120	192777965		51	327.99	19.76	0	20		-204	192778169	192780029	RGS2	+
chr1	193028335	193028655	193028465		32	272.18	29.93	0	17		-87	193028552	193054011	TROVE2	+
chr1	193074205	193074789	193074480		45	174.14	10.3	0.05	13		81	193065598	193074561	GLRX2	-
chr1	193074205	193074789	193074630		45	174.14	10.3	0.05	13		-69	193065598	193074561	GLRX2	-
chr1	193090742	193091516	193091125		90	441.94	18.42	0	26		-22	193091147	193223031	CDC73	+
chr1	197743808	197744881	197744235		87	733.35	40.18	0	18		220	197521385	197744455	DENND1B	-
chr1	197871477	197872360	197871995		91	745.38	36.97	0	21		87	197871908	197876497	C1orf53	+
chr1	197871477	197872360	197871685		91	745.38	36.97	0	21		-223	197871908	197876497	C1orf53	+
chr1	198125887	198126627	198126235		115	1356.65	142.42	0	49		-16	198126251	198225661	NEK7	+
chr1	200008355	200008585	200008445		14	128.32	25.13	0.14	10		-4493	200012938	200027552	NR5A2	+
chr1	200638417	200639198	200638625		101	678.97	42.29	0	43		211	200635387	200638836	DDX59	-
chr1	200707703	200708535	200708270		56	379.15	33	0	17		-416	200708686	200829829	CAMSAP1L1	+
chr1	200708579	200709029	200708715		65	491.79	36.31	0	33		29	200708686	200822544	CAMSAP1L1	+
chr1	200992428	200992959	200992795		85	934.1	92.43	0	42		-36466	200950162	200956329	KIF21B	-
chr1	201140205	201140577	201140295		27	176.68	16.14	0.05	10		407	201103901	201140702	TMEM9	-
chr1	201140205	201140577	201140460		27	176.68	16.14	0.05	10		242	201103901	201140702	TMEM9	-
chr1	201278626	201278995	201278800		17	93.73	19.54	0.28	12		-6520	201285320	201289300	PKP1	+
chr1	201437667	201438784	201438295		173	1418.03	59.05	0	48		17	201434620	201438312	PHLDA3	-
chr1	201507718	201508781	201508195		128	1108.35	66.91	0	36		-29611	201452658	201478584	CSRP1	-
chr1	201617189	201617447	201617365		16	85.31	14.82	0.38	12		-12	201617377	201796097	NAV1	+
chr1	201617715	201618056	201617905		85	797.29	52.19	0	52		455	201617450	201796097	NAV1	+
chr1	201924367	201924524	201924450		12	110.95	22.97	0.16	12		-169	201924619	201939789	TIMM17A	+
chr1	202113679	202114087	202113915		64	626.38	55.02	0	30		-46	202102532	202113869	ARL8A	-
chr1	202777353	202777774	202777595		20	88.73	12.38	0.35	10		-1262	202736159	202776333	KDM5B	-
chr1	202857644	202858007	202857795		20	142.3	31.44	0.12	15		468	202848085	202858263	RABIF	-
chr1	202858107	202858414	202858280		19	145.31	27.25	0.11	12		-17	202848085	202858263	RABIF	-
chr1	202927148	202927830	202927460		40	311.46	33.51	0	12		57	202909951	202927517	ADIPOR1	-
chr1	202995376	202995841	202995675		49	308.1	29.74	0	28		49	202995626	203047864	PPFIA4	+
chr1	203097297	203097667	203097495		16	104.6	22.01	0.2	10		61	203097434	203135877	ADORA1	+
chr1	203259439	203259779	203259675		19	97.97	18.86	0.25	15		-14944	203274619	203278697	BTG2	+
chr1	203296198	203296775	203296565		24	157.49	30.72	0.06	10		20775	203309753	203317340	FMOD	-
chr1	203619496	203619926	203619720		33	243.8	22.89	0	13		23792	203595928	203713207	ATP2B4	+
chr1	204042221	204042980	204042495		51	384.64	28.61	0	13		-237	204042732	204096863	SOX13	+
chr1	204120350	204121461	204121285		71	373.5	21.38	0	17		-729	204119001	204120556	ETNK2	-
chr1	204463160	204464148	204463885		229	1859.74	62.42	0	77		-56	204438750	204463829	PIK3C2B	-
chr1	204485566	204485941	204485715		18	121.41	25.77	0.16	12		115	204485600	204513727	MDM4	+
chr1	204654242	204654747	204654535		44	341.27	29.93	0	16		-41	204589028	204654494	LRRN2	-
chr1	205196788	205197408	205197125		66	427.61	24.05	0	22		-179	205197304	205242471	TMCC2	+
chr1	205290236	205290613	205290460		26	178.73	28.29	0.05	17		423	205271187	205290883	NUAK2	-
chr1	205537828	205538371	205538230		28	201.07	34.68	0.03	12		125	205538105	205572046	MFSD4	+
chr1	205600213	205601333	205600615		147	1323.25	52.82	0	30		475	205588396	205601090	ELK4	-
chr1	205648817	205649555	205649320		59	454.54	47.09	0	22		267	205626979	205649587	SLC45A3	-
chr1	205718481	205719061	205718890		68	509.33	33.25	0	25		403	205686447	205719293	NUCKS1	-
chr1	206135439	206135806	206135545		29	222.56	32.34	0.03	18		-1371	206136916	206154164	FAM72A	+
chr1	206135843	206136419	206136185		32	193.37	24.35	0.03	13		-731	206136916	206154164	FAM72A	+
chr1	206137209	206137624	206137355		37	114.35	9.94	0.16	19		90	206137265	206154207	FAM72A	+
chr1	206223549	206224046	206223720		29	131.19	11	0.13	10		-256	206223976	206231639	AVPR1B	+
chr1	206730357	206730884	206730605		36	220.7	30.81	0.03	20		112	206730493	206762599	RASSF5	+
chr1	206808545	206809380	206808775		69	593.7	54.72	0	23		-149	206808924	206822542	DYRK3	+
chr1	206858192	206858552	206858385		21	110.11	12.58	0.16	10		3	206858382	206907628	MAPKAPK2	+
chr1	206858841	206859170	206859035		24	199.99	26.41	0.03	13		653	206858382	206907628	MAPKAPK2	+
chr1	207494565	207495384	207495115		72	489.65	33.21	0	23		127	207494988	207534311	CD55	+
chr1	207627391	207628355	207628135		71	479.16	32.28	0	19		371	207627764	207658899	CR2	+
chr1	207925916	207926316	207926200		23	179.54	33.01	0.04	11		732	207925468	207966991	CD46	+
chr1	208416488	208417192	208416690		67	661.75	55.85	0	19		956	208403536	208417646	PLXNA2	-
chr1	208416488	208417192	208416995		67	661.75	55.85	0	19		651	208403536	208417646	PLXNA2	-
chr1	208417431	208418062	208417795		83	829.67	68.23	0	31		-149	208403536	208417646	PLXNA2	-
chr1	209848356	209849084	209848565		43	256.65	22.89	0	13		-200	209848765	209849733	G0S2	+
chr1	210111256	210111902	210111535		34	170.88	17.09	0.06	12		-41	210111576	210335568	SYT14	+
chr1	210405637	210407325	210406215		251	2832.4	117.38	0	43		102	210404801	210406317	C1orf133	-
chr1	210407398	210407753	210407535		22	129.62	15.67	0.13	11		-69	210404804	210407466	C1orf133	-
chr1	210424634	210425309	210425215		42	336.61	30.72	0	11		13892	210411323	210419976	SERTAD4	+
chr1	210465809	210466200	210466040		19	148.97	27.93	0.07	10		-35566	210501606	210849631	HHAT	+
chr1	210501947	210502486	210502210		48	353.95	30.11	0	19		-54	210502264	210804507	HHAT	+
chr1	210502535	210502861	210502680		26	168.57	23.03	0.06	16		36	210502644	210849638	HHAT	+
chr1	211307191	211307781	211307485		62	516.15	57.23	0	32		-28	210856580	211307457	KCNH1	-
chr1	211432063	211433282	211432645		134	1246.02	77.03	0	35		-63	211432708	211489727	RCOR3	+
chr1	211433724	211434001	211433925		16	108.93	19.37	0.17	11		608	211433317	211489727	RCOR3	+
chr1	211499983	211500436	211500185		34	253.2	40.35	0	21		6	211500179	211548288	TRAF5	+
chr1	211556030	211556205	211556110		11	106.5	27.93	0.2	10		-35	211556145	211605878	C1orf97	+
chr1	211589586	211590412	211589675		54	424.28	36.25	0	14		33496	211556179	211565318	C1orf97	+
chr1	211688788	211689317	211688995		44	310.57	26.44	0	16		-22736	211649864	211666259	RD3	-
chr1	211750989	211751469	211751230		67	545.46	56.59	0	45		835	211744910	211752065	SLC30A1	-
chr1	211751490	211753023	211752825		97	586.21	36.65	0	20		-760	211744910	211752065	SLC30A1	-
chr1	212003419	212004302	212003785		76	467.55	25.15	0	19		279	212002521	212004064	LPGAT1	-
chr1	212458356	212459615	212459010		189	1816.56	72.19	0	40		131	212458879	212535200	PPP2R5A	+
chr1	212606056	212606598	212606265		45	347.2	49.52	0	26		-68	212606333	212608375	NENF	+
chr1	212781533	212782487	212782165		158	1705.78	105.09	0	49		153	212782012	212794119	ATF3	+
chr1	212782501	212783031	212782635		33	231.63	25.77	0.02	12		378	212782257	212792953	ATF3	+
chr1	212872618	212873466	212873225		78	639.52	50.86	0	25		102	212859760	212873327	BATF3	-
chr1	212965096	212965433	212965255		19	130.74	24.88	0.13	13		-13	212965268	212977840	TATDN3	+
chr1	213031381	213031977	213031625		56	516.18	49.96	0	21		28	213031597	213072705	FLVCR1	+
chr1	213188504	213189053	213188595		48	215.1	16.14	0.03	19		240	213181552	213188835	ANGEL2	-
chr1	213739732	213739835	213739785		10	54.43	4.58	1.92	10		324382	213415403	213436159	RPS6KC1	+
chr1	214155955	214156853	214156375		63	443.01	27.7	0	14		-149	214156524	214170568	PROX1	+
chr1	214338650	214338787	214338725		10	119.67	27.93	0.17	10		-115720	214454445	214510474	SMYD2	+
chr1	214454136	214455069	214454825		147	1669.72	90.55	0	34		249	214454576	214510474	SMYD2	+
chr1	214724630	214725341	214725110		66	417.5	31.34	0	23		-165	214701619	214724945	PTPN14	-
chr1	215255980	215256546	215256295		34	281.17	44.68	0	16		-172	215256467	215408560	KCNK2	+
chr1	215740506	215741362	215740960		73	612.72	57.22	0	25		225	215740735	215791478	KCTD3	+
chr1	216774368	216774670	216774455		16	131.16	32.01	0.13	12		76380	216676588	216850835	ESRRG	-
chr1	217308787	217309077	217308875		18	102.38	17.93	0.21	14		-44986	217038403	217263889	ESRRG	-
chr1	217330819	217331023	217330870		17	67.35	9.62	0.92	16		-66981	217038403	217263889	ESRRG	-
chr1	218518939	218519665	218519405		103	1177.94	100.53	0	34		-172	218519577	218617961	TGFB2	+
chr1	220095323	220095573	220095525		16	60.67	9.58	1.42	13		-3153	220087606	220092372	SLC30A10	-
chr1	220101220	220101774	220101365		39	173.05	11.74	0.07	12		579	220088496	220101944	SLC30A10	-
chr1	220219595	220220080	220219875		88	929.52	96.84	0	54		-77	220205728	220219798	EPRS	-
chr1	220701263	220702109	220701560		146	1780.14	148.01	0	52		-241	220701801	220756233	MARK1	+
chr1	220921406	220921706	220921630		17	93.73	17.22	0.28	13		63	220921567	220928402	MOSC2	+
chr1	220959514	220960694	220960245		113	874.29	51.06	0	29		144	220960101	220987730	MOSC1	+
chr1	221916018	221916812	221916280		92	935.19	70.43	0	28		-762	221874766	221915518	DUSP10	-
chr1	222638670	222639097	222638880		37	238.41	23.86	0	18		59701	222695602	222698581	HHIPL2	-
chr1	222886501	222886795	222886715		14	93.68	22.01	0.28	11		4	222886711	222900574	C1orf58	+
chr1	222988050	222988633	222988345		39	329.47	37.35	0	13		-61	222988406	223168242	DISP1	+
chr1	223316144	223316801	223316535		69	520.61	52.13	0	35		45	223286310	223316580	TLR5	-
chr1	223537387	223538186	223537515		59	435.59	34.35	0	16		29	223532400	223537544	SUSD4	-
chr1	223743528	223744528	223743985		118	1121.59	81.43	0	37		-19605	223714979	223724380	CAPN8	-
chr1	223899984	223900536	223900265		91	662.08	30.81	0	34		146	223900119	223963718	CAPN2	+
chr1	223900540	223900838	223900625		19	112.73	16.7	0.16	10		506	223900119	223963718	CAPN2	+
chr1	224032982	224034287	224033745		214	1522.04	38.73	0	44		-89	223998166	224033656	TP53BP2	-
chr1	224180182	224180919	224180500		54	155.66	8.27	0.06	12		-121291	224301791	224349749	FBXO28	+
chr1	224180182	224180919	224180745		54	155.66	8.27	0.06	12		-121046	224301791	224349749	FBXO28	+
chr1	224370448	224371841	224370980		286	2789.83	91.36	0	65		52	224370928	224381140	DEGS1	+
chr1	224544503	224545093	224544795		37	196.45	15.61	0.03	12		172	224544623	224558999	CNIH4	+
chr1	224690823	224691707	224691215		68	440.92	22.77	0	16		-10175	224701390	224708923	CNIH3	+
chr1	224803468	224804265	224803885		88	746.58	45.78	0	24		-110	224803995	224928251	CNIH3	+
chr1	225117146	225117814	225117435		68	398.99	27.48	0	27		18	225117417	225149031	DNAH14	+
chr1	225614642	225614952	225614780		15	51.51	12.72	2.19	13		819	225611623	225615599	LBR	-
chr1	225615110	225615396	225615250		16	57.73	8.8	1.61	11		349	225611623	225615599	LBR	-
chr1	225615411	225616144	225615765		104	873.99	43.32	0	31		-166	225611623	225615599	LBR	-
chr1	225662725	225663156	225662940		22	80.64	11.41	0.44	11		26018	225685125	225688958	ENAH	-
chr1	225840237	225841806	225840795		493	3100	138.65	0	128		-72836	225706900	225767959	ENAH	-
chr1	225965121	225965593	225965375		33	141.85	15.85	0.12	18		-156	225965531	225978168	SRP9	+
chr1	225997597	225998220	225997875		48	317.45	21.25	0	14		39	225997836	226026398	EPHX1	+
chr1	226069793	226070611	226070180		75	466.88	28.84	0	23		-4801	226058792	226065379	TMEM63A	-
chr1	226111640	226112217	226111920		76	476.81	18.66	0	22		58	226111182	226111978	PYCR2	-
chr1	226186910	226187384	226187140		35	218.77	19.51	0.03	13		-74	226170406	226187066	C1orf55	-
chr1	226249333	226250818	226250215		307	3100	99.66	0	60		-164	226250379	226259700	H3F3A	+
chr1	226270813	226271812	226271275		57	199.31	16.63	0.03	18		19597	226251678	226259702	H3F3A	+
chr1	226297212	226298698	226297695		185	1667.9	106.59	0	59		46017	226251678	226259702	H3F3A	+
chr1	226309006	226310552	226309855		191	1406.43	40.24	0	32		39478	226342343	226349333	ACBD3	-
chr1	226373930	226374592	226374225		48	121.72	7.43	0.16	14		206	226332380	226374431	ACBD3	-
chr1	226459785	226460413	226460185		32	107.22	12.72	0.18	13		36587	226475394	226496772	LIN9	-
chr1	226496270	226497588	226496995		188	1753.61	98.6	0	53		-40	226420414	226496955	LIN9	-
chr1	226595299	226596008	226595735		168	1840.51	79.69	0	51		-52	226589684	226595683	PARP1	-
chr1	226736182	226737169	226736515		150	1245.22	50.3	0	40		14	226736501	226789741	C1orf95	+
chr1	226890904	226891448	226891315		67	498.12	33.58	0	28		33844	226819391	226925159	ITPKB	-
chr1	227057935	227058779	227058395		129	857.63	28.1	0	33		78	227058317	227073269	PSEN2	+
chr1	227127025	227128598	227128035		180	1175.35	52.82	0	47		48	227127987	227175245	CABC1	+
chr1	227505233	227506845	227506445		277	3207.7	115.7	0	45		-64589	227400837	227441856	CDC42BPA	-
chr1	227975514	227975945	227975695		52	398.73	27.89	0	22		-27699	228003394	228034171	PRSS38	+
chr1	228134402	228135065	228134565		43	140.47	8.8	0.11	11		1034	228106357	228135599	WNT9A	-
chr1	228135121	228136221	228135795		223	2350.28	86.37	0	51		-164	228106358	228135631	WNT9A	-
chr1	228160401	228160965	228160610		35	122.54	12	0.16	15		-24979	228106358	228135631	WNT9A	-
chr1	228194247	228195148	228194715		102	816.8	61.94	0	39		-37	228194752	228248961	WNT3A	+
chr1	228290382	228291234	228291045		65	344.38	27.67	0	21		-342	228289114	228290703	C1orf35	-
chr1	228327560	228328326	228327785		152	1344.89	67.13	0	60		-144	228327929	228335394	GUK1	+
chr1	228353165	228354144	228353385		129	1069.68	40.26	0	27		-131	228353516	228369958	C1orf69	+
chr1	228401088	228401494	228401355		73	566.32	42.1	0	47		-8	228391803	228401347	C1orf145	-
chr1	228565714	228566566	228566040		65	352.35	26.28	0	19		19350	228582909	228585390	TRIM11	-
chr1	228593783	228594606	228593980		57	369.53	21.59	0	13		484	228581817	228594464	TRIM11	-
chr1	228644902	228645662	228645235		137	1093.93	52.82	0	54		325	228645065	228645560	HIST3H2A	-
chr1	228645956	228646595	228646355		58	265.34	14.49	0	17		547	228645808	228646259	HIST3H2BB	+
chr1	228674654	228675830	228675485		91	355.04	16.74	0	19		723	228674762	228683467	RNF187	+
chr1	228744409	228744723	228744545		31	85.04	8.8	0.38	21		-44541	228698126	228700004	RP5-915N17.9	-
chr1	228750571	228751474	228751285		75	125.81	6.6	0.15	18		-51281	228698126	228700004	RP5-915N17.9	-
chr1	228752654	228753691	228753465		70	83.59	5.48	0.4	15		-53461	228698126	228700004	RP5-915N17.9	-
chr1	228759400	228760331	228760160		72	99.05	8.42	0.25	23		-60156	228698126	228700004	RP5-915N17.9	-
chr1	228763963	228764881	228764675		58	57.36	5.77	1.66	15		-64671	228698126	228700004	RP5-915N17.9	-
chr1	228766123	228767143	228766865		68	62.71	6.03	1.21	18		-66861	228698126	228700004	RP5-915N17.9	-
chr1	228766123	228767143	228766865		68	62.71	6.03	1.21	18		-66861	228698126	228700004	RP5-915N17.9	-
chr1	228768139	228769266	228769145		74	52.94	8.15	2.05	24		-69141	228698126	228700004	RP5-915N17.9	-
chr1	228770562	228771542	228771355		106	92.24	10.9	0.29	53		-71351	228698126	228700004	RP5-915N17.9	-
chr1	228775131	228776457	228775840		98	92.31	8.8	0.29	26		-75836	228698126	228700004	RP5-915N17.9	-
chr1	228783275	228784237	228783845		92	420.8	17.45	0	23		-83841	228698126	228700004	RP5-915N17.9	-
chr1	228870843	228871691	228871245		95	809.82	66.91	0	37		421	228870824	228882416	RHOU	+
chr1	229002968	229003233	229003055		11	64.97	17.61	1.08	10		121068	228881987	228882416	RHOU	+
chr1	229357138	229357490	229357220		22	139.09	15.54	0.11	10		-28163	229385383	229387557	TMEM78	+
chr1	229406642	229407380	229406805		94	734.12	26.02	0	20		-136	229406941	229439641	RAB4A	+
chr1	229477722	229479105	229478255		281	2355.99	51.84	0	52		9	229463283	229478264	C1orf96	-
chr1	229693686	229695222	229694465		341	2697.18	50.42	0	63		-23	229652329	229694442	ABCB10	-
chr1	229761012	229762250	229761410		240	2181.85	69.08	0	56		307	229734941	229761717	TAF5L	-
chr1	230202314	230203484	230202955		313	3100	107.24	0	67		-1	230202956	230417870	GALNT2	+
chr1	230404000	230404571	230404345		35	200.11	19.07	0.03	13		6648	230397697	230400718	GALNT2	+
chr1	230561281	230562771	230562015		310	3100	144.37	0	81		-540	230457392	230561475	PGBD5	-
chr1	231004046	231004370	231004255		15	86.04	16.61	0.38	10		-111	230975598	231004144	AL118511.1	-
chr1	231113781	231115027	231114525		131	764.57	28.37	0	29		75	231076255	231114600	TTC13	-
chr1	231174949	231175215	231175135		14	90.89	18.99	0.32	11		857	231154704	231175992	FAM89A	-
chr1	231175443	231176291	231175950		129	1069.68	57.3	0	45		42	231154704	231175992	FAM89A	-
chr1	231297752	231298487	231298135		78	544.38	26.41	0	20		-539	231298674	231349675	TRIM67	+
chr1	231376850	231377099	231376985		18	102.38	15.41	0.21	13		23	231376962	231411014	GNPAT	+
chr1	231556886	231558625	231558025		365	3100	106.74	0	98		-1936	231501886	231556089	EGLN1	-
chr1	231762233	231763232	231763055		60	316.24	19.07	0	13		494	231762561	232177014	DISC1	+
chr1	232308973	232309297	232309145		15	106.58	25.48	0.2	11		212366	232096779	232100003	RP4-730B13.2	+
chr1	232765359	232766626	232765805		165	1535.39	57.41	0	30		-136399	232626432	232629406	SIPA1L2	-
chr1	233463372	233464904	233463540		326	2638.01	51.06	0	56		26	233463514	233509880	RP5-862P8.2	+
chr1	233749213	233750416	233749920		131	782.51	29.34	0	28		170	233749750	233808258	KCNK1	+
chr1	233771614	233772030	233771790		31	226.47	35.21	0.03	19		-480	233772270	233802736	KCNK1	+
chr1	233843305	233843593	233843460		15	96.78	19.37	0.26	10		52019	233791441	233802432	KCNK1	+
chr1	234040252	234040974	234040535		108	753.5	28.19	0	30		-144	234040679	234460262	SLC35F3	+
chr1	234613797	234615173	234614555		465	3100	93.54	0	85		-57995	234546150	234556560	TARBP1	-
chr1	234690472	234690896	234690675		23	101.01	17.61	0.21	16		53165	234742977	234743840	IRF2BP2	-
chr1	234735396	234736224	234735615		144	1614.88	72.63	0	34		8225	234742977	234743840	IRF2BP2	-
chr1	234744175	234747199	234745875		713	3100	136.45	0	93		-604	234740015	234745271	IRF2BP2	-
chr1	234748280	234749175	234748480		60	341.38	22.01	0	13		-3209	234740015	234745271	IRF2BP2	-
chr1	234748280	234749175	234748745		60	341.38	22.01	0	13		-3474	234740015	234745271	IRF2BP2	-
chr1	234858902	234859871	234859735		51	239.87	19.4	0	14		-114464	234740015	234745271	IRF2BP2	-
chr1	234859901	234860253	234860145		23	132.54	15.87	0.13	10		-114874	234740015	234745271	IRF2BP2	-
chr1	235093155	235093410	235093240		13	75.19	16.14	0.56	11		189974	235275340	235283214	TOMM20	-
chr1	235105657	235106092	235105905		56	539.61	88.28	0	46		177309	235275340	235283214	TOMM20	-
chr1	235267603	235267927	235267695		16	98.65	19.37	0.24	10		15519	235275340	235283214	TOMM20	-
chr1	235291958	235292503	235292125		40	168.04	12.32	0.06	14		126	235272651	235292251	TOMM20	-
chr1	235324248	235324803	235324665		29	183.71	27.39	0.04	14		-134	235323510	235324531	RBM34	-
chr1	235490414	235491105	235490705		33	127.93	12.18	0.14	10		40	235490665	235506408	GGPS1	+
chr1	235667028	235668208	235667525		186	1566.13	50.3	0	40		197	235628213	235667722	B3GALNT2	-
chr1	235811832	235813346	235813045		95	547.43	28.34	0	17		248	235710987	235813293	GNG4	-
chr1	235963163	235963412	235963220		14	69.21	12.1	0.81	11		-11072	235950370	235952148	LYST	-
chr1	236029464	236030573	236030165		131	1193.08	48.86	0	24		10	235992708	236030175	LYST	-
chr1	236066508	236066693	236066595		20	120.34	15.56	0.16	19		-19655	235954873	236046940	LYST	-
chr1	236227975	236228843	236228585		100	484.18	28.51	0	41		-176	236139130	236228409	NID1	-
chr1	236260270	236260793	236260525		121	243.23	10.71	0	72		-32044	236176327	236228481	NID1	-
chr1	236305584	236306103	236305755		37	238.94	22.89	0	13		-89	236305844	236343488	GPR137B	+
chr1	236306269	236306834	236306625		28	165.63	28.61	0.06	13		557	236306068	236368498	GPR137B	+
chr1	236558397	236559293	236558520		72	554.8	47.38	0	22		-196	236558716	236648026	EDARADD	+
chr1	236849312	236850429	236849620		243	2634.04	121.39	0	73		-207	236849827	236908069	ACTN2	+
chr1	237205142	237206263	237205625		67	186.52	9.54	0.04	13		120	237205505	237997288	RYR2	+
chr1	237206309	237206681	237206475		19	83.65	12.58	0.4	10		970	237205505	237997288	RYR2	+
chr1	238027572	238027963	238027795		14	69.21	18.98	0.81	11		26299	238045705	238054094	ZP4	-
chr1	239549687	239550746	239550205		125	670.99	35.21	0	45		-15	239550220	239769507	CHRM3	+
chr1	240160830	240161737	240161305		82	665.33	44.99	0	23		-16343	240177648	240370487	FMN2	+
chr1	240254928	240255612	240255205		151	1585.22	102.71	0	71		25	240255180	240638489	FMN2	+
chr1	240255817	240256470	240256085		42	149.26	12.8	0.07	16		905	240255180	240638489	FMN2	+
chr1	240256558	240257099	240256815		34	199.59	14.31	0.03	10		1635	240255180	240638489	FMN2	+
chr1	241519758	241520935	241520685		139	1298.71	51.85	0	25		-1609	240963947	241519076	RGS7	-
chr1	241586950	241587778	241587240		71	563.65	43.04	0	21		-68164	240963947	241519076	RGS7	-
chr1	241802929	241804087	241803625		174	1001.17	34.54	0	50		-113	241757900	241803512	OPN3	-
chr1	242687254	242688387	242687725		94	540.68	23.89	0	18		248	242287720	242687973	PLD5	-
chr1	242687254	242688387	242688130		94	540.68	23.89	0	18		-157	242287720	242687973	PLD5	-
chr1	243418121	243418624	243418415		55	562.2	67.32	0	26		293	243349198	243418708	CEP170	-
chr1	244012322	244012632	244012525		18	135.64	30.06	0.12	14		905	243665065	244013430	AKT3	-
chr1	244012733	244014535	244013595		200	1795.14	77.3	0	35		-165	243665065	244013430	AKT3	-
chr1	244211059	244212278	244211855		201	1893.46	98.19	0	64		-2706	244214561	244220774	ZNF238	+
chr1	244212311	244213007	244212695		111	1231.68	104.69	0	43		-1866	244214561	244220774	ZNF238	+
chr1	244614826	244615644	244615325		101	811.98	44.02	0	30		-280	244587656	244615045	ADSS	-
chr1	244624378	244625017	244624700		147	1822.86	145.25	0	66		10	244624690	244803662	C1orf101	+
chr1	244816150	244816785	244816435		86	721.09	55.99	0	40		7	244816428	244819823	PPPDE1	+
chr1	244998199	244999318	244999095		87	452.91	22.01	0	19		471	244998624	245008359	FAM36A	+
chr1	245026199	245027241	245026600		420	3100	123.95	0	133		-204	245021413	245026396	HNRNPU	-
chr1	245027511	245028117	245027705		37	153.05	12.72	0.07	13		88	245025080	245027793	HNRNPU	-
chr1	245081817	245082378	245082225		57	338.97	25.73	0	26		-50946	245133171	245251139	EFCAB2	+
chr1	245132929	245134423	245134225		188	1503.82	58.69	0	40		533	245133692	245251138	EFCAB2	+
chr1	245134435	245134835	245134625		38	264.17	33.54	0	24		900	245133725	245250883	EFCAB2	+
chr1	246887496	246887829	246887655		14	106.01	30.72	0.2	11		277	246887378	246931437	SCCPDH	+
chr1	248020340	248021121	248020915		42	282.35	24.21	0	11		414	248020501	248041507	TRIM58	+
chr10	180556	182061	181425		107	875.08	64.23	0	23		1	181424	298410	ZMYND11	+
chr10	587738	588008	587935		24	158.57	20.28	0.06	17		-55461	410938	532474	DIP2C	-
chr10	735408	735903	735525		46	238.89	13.97	0	16		158	486811	735683	DIP2C	-
chr10	977227	977478	977375		14	120.21	26.68	0.16	10		41	910094	977416	LARP4B	-
chr10	977540	978036	977805		26	175.19	31.07	0.05	11		-241	909719	977564	LARP4B	-
chr10	1094521	1095342	1095005		52	390.12	37.07	0	14		-130	1088617	1094875	IDI1	-
chr10	1102143	1102470	1102385		19	140.29	31.44	0.11	15		41	1102344	1142566	WDR37	+
chr10	1340723	1340965	1340920		14	109.09	25.67	0.17	12		-58327	1261616	1282593	ADARB2	-
chr10	3109607	3109988	3109730		21	129.62	16.81	0.13	10		-10	3109740	3179762	PFKP	+
chr10	3111041	3111443	3111255		23	87.31	8.87	0.36	10		-170	3111425	3146129	PFKP	+
chr10	3168898	3169560	3169200		64	455.31	45.48	0	30		-1999	3171199	3178985	PFKP	+
chr10	3214602	3215112	3214925		49	298.28	31.49	0	28		78	3193386	3215003	PITRM1	-
chr10	3330293	3330551	3330445		16	101.57	14.67	0.21	10		-115442	3193386	3215003	PITRM1	-
chr10	3827026	3827414	3827260		18	138.6	27.93	0.13	10		115	3824000	3827375	KLF6	-
chr10	3827709	3827970	3827805		18	67.35	9.99	0.92	13		-350	3824271	3827455	KLF6	-
chr10	5488406	5488836	5488605		56	631.74	108.91	0	39		31	5488574	5500426	NET1	+
chr10	5590797	5591134	5590970		22	196.93	30.72	0.03	11		24046	5566924	5568225	CALML3	+
chr10	5707949	5708856	5708545		108	901.54	30.37	0	19		-4	5680831	5708541	ASB13	-
chr10	5734533	5734958	5734810		34	142.45	13.5	0.12	17		-6601	5741411	5751626	C10orf18	+
chr10	5930857	5931527	5931280		34	170.04	16.14	0.06	11		589	5920085	5931869	ANKRD16	-
chr10	5931605	5931959	5931815		46	269.35	21.88	0	28		54	5920085	5931869	ANKRD16	-
chr10	6018943	6019830	6019485		70	376.14	23.45	0	21		-49	5998388	6019436	IL15RA	-
chr10	6019840	6020219	6020030		20	130.58	25.77	0.13	11		-22	5994349	6020008	IL15RA	-
chr10	6130845	6131411	6130930		34	162.6	14.97	0.06	12		-104	6131034	6152053	RBM17	+
chr10	6186558	6187474	6186875		112	1207.89	55.85	0	20		-22	6186897	6277495	PFKFB3	+
chr10	6205462	6205999	6205765		66	408.42	29.93	0	34		17486	6188279	6271105	PFKFB3	+
chr10	6243426	6243956	6243605		65	370.81	22.59	0	29		-1224	6244829	6274922	PFKFB3	+
chr10	6244531	6245726	6245435		107	610.56	19.81	0	18		229	6245206	6275080	PFKFB3	+
chr10	6621886	6622614	6622420		44	338.86	32.01	0	12		-182	6469134	6622238	PRKCQ	-
chr10	6858502	6858726	6858560		17	50.16	7.43	2.23	15		-236297	6469105	6622263	PRKCQ	-
chr10	7469738	7469956	7469885		16	156.87	39.1	0.06	14		-16435	7390249	7453450	SFMBT2	-
chr10	8091309	8092173	8091545		46	338.84	44.68	0	16		-4022	8095567	8097516	GATA3	+
chr10	8092217	8092736	8092325		43	407.92	39.1	0	14		-3242	8095567	8097516	GATA3	+
chr10	8096269	8096907	8096400		50	442.95	60.52	0	20		-256	8096656	8117161	GATA3	+
chr10	8097489	8097890	8097695		29	88.81	10.62	0.35	18		926	8096769	8116853	GATA3	+
chr10	8216815	8217043	8216965		11	78.12	20.16	0.5	10		116603	8100362	8116027	GATA3	+
chr10	8374254	8374603	8374405		21	160.46	37.41	0.06	17		274043	8100362	8116027	GATA3	+
chr10	8720521	8720715	8720650		16	60.67	8.58	1.42	15		-560751	9281401	9449824	AL355591.1	+
chr10	11059314	11060758	11059985		227	2368	122.97	0	58		-121	11060106	11373245	CUGBP2	+
chr10	11207001	11207409	11207205		25	214.28	53.06	0.03	19		132	11207073	11373245	CUGBP2	+
chr10	11207654	11208023	11207885		21	176.64	30.72	0.05	11		812	11207073	11373245	CUGBP2	+
chr10	11653432	11654036	11653785		61	501.98	40.5	0	22		-32	11502511	11653753	USP6NL	-
chr10	12391260	12391870	12391665		36	157.45	13.98	0.06	12		184	12391481	12877545	CAMK1D	+
chr10	13043360	13043948	13043695		39	323.43	38.89	0	15		2	12938627	13043697	CCDC3	-
chr10	13142060	13142376	13142185		32	336.66	58.6	0	21		-40	13142225	13180291	OPTN	+
chr10	13341335	13342251	13341600		64	335.92	18.86	0	14		452	13330412	13342052	PHYH	-
chr10	13341335	13342251	13342035		64	335.92	18.86	0	14		17	13330412	13342052	PHYH	-
chr10	13389312	13389723	13389560		26	136.63	19.34	0.12	15		-202	13375877	13389358	SEPHS1	-
chr10	13389753	13390650	13390325		73	468.12	30.81	0	21		-66	13361090	13390259	SEPHS1	-
chr10	13570279	13571370	13571015		116	1181.68	72.61	0	26		-41	13538788	13570974	BEND7	-
chr10	13933508	13934179	13933950		77	668.45	51.06	0	28		-33042	13821010	13900908	FRMD4A	-
chr10	14645669	14646578	14646365		65	489.47	44.02	0	20		-96	14644456	14646269	FAM107B	-
chr10	14879676	14879976	14879825		16	60.67	8.83	1.42	10		246	14861979	14880071	CDNF	-
chr10	14920274	14920876	14920720		34	170.88	15.93	0.06	12		-99	14920819	14946314	SUV39H2	+
chr10	15139126	15139578	15139335		21	129.62	21.93	0.13	11		5	15139330	15146254	RPP38	+
chr10	15203026	15203169	15203105		11	52.23	6.97	2.12	11		7518	15145617	15210623	NMT2	-
chr10	15209962	15210872	15210505		105	1003	68.23	0	31		118	15145617	15210623	NMT2	-
chr10	15412732	15413616	15413335		120	1330.24	78.19	0	28		-238	15254914	15413097	FAM171A1	-
chr10	15761651	15762170	15761855		24	133.34	19.37	0.13	11		62479	15820853	15824334	FAM188A	-
chr10	17243144	17243893	17243665		68	476.83	33.75	0	21		388	17213907	17244053	TRDMT1	-
chr10	17270331	17270987	17270565		52	379.42	26.41	0	15		51	17270514	17271869	VIM	+
chr10	17270331	17270987	17270760		52	379.42	26.41	0	15		246	17270514	17271869	VIM	+
chr10	17271112	17271837	17271575		55	241.91	14.97	0	17		285	17271290	17273092	VIM	+
chr10	17271843	17272735	17272515		54	199.86	11.74	0.03	12		512	17272003	17279592	VIM	+
chr10	17271843	17272735	17272085		54	199.86	11.74	0.03	12		82	17272003	17279592	VIM	+
chr10	17495940	17496735	17496195		50	401.08	36.3	0	13		134	17361873	17496329	ST8SIA6	-
chr10	17658674	17659690	17659355		109	906.24	44.02	0	25		-121	17641073	17659234	PTPLA	-
chr10	18429088	18429916	18429255		56	476.8	33.51	0	12		-351	18429606	18830056	CACNB2	+
chr10	18429088	18429916	18429505		56	476.8	33.51	0	12		-101	18429606	18830056	CACNB2	+
chr10	18429088	18429916	18429650		56	476.8	33.51	0	12		44	18429606	18830056	CACNB2	+
chr10	21462354	21463730	21462975		155	1439.75	74.83	0	33		-208	21460476	21462767	NEBL	-
chr10	21784606	21785211	21784845		39	258.51	26.67	0	15		1346	21783421	21786191	C10orf114	-
chr10	21785351	21786433	21786205		102	828.78	55.3	0	29		-14	21783421	21786191	C10orf114	-
chr10	21805405	21806780	21805925		267	2823.87	103.83	0	60		6899	21808437	21812824	C10orf140	-
chr10	21814303	21815675	21815265		123	1069.77	53.8	0	22		-654	21805036	21814611	C10orf140	-
chr10	21815929	21816554	21816135		100	1127.33	121.34	0	50		-1524	21805036	21814611	C10orf140	-
chr10	21822666	21823485	21823105		164	2100.23	153.59	0	54		11	21823094	21846111	MLLT10	+
chr10	21823585	21824550	21823775		83	752.27	61.44	0	22		97	21823678	21884313	MLLT10	+
chr10	22291994	22292955	22292275		194	2256.81	101.63	0	48		239	22208818	22292514	DNAJC1	-
chr10	22604820	22605611	22605285		120	876.91	48.91	0	50		-29	22605314	22607330	COMMD3	+
chr10	22609285	22611107	22609815		281	3233.06	167.55	0	60		-325	22610140	22620182	BMI1	+
chr10	22614254	22614934	22614605		47	361.56	44.02	0	20		19	22614586	22616720	BMI1	+
chr10	22625720	22625885	22625805		11	92.75	29.34	0.29	10		-8594	22634399	22706550	SPAG6	+
chr10	22629484	22630353	22629915		55	233.64	14.22	0.02	12		-4484	22634399	22706550	SPAG6	+
chr10	22629484	22630353	22630255		55	233.64	14.22	0.02	12		-4144	22634399	22706550	SPAG6	+
chr10	22843664	22844195	22843980		39	352.23	41.89	0	15		-15416	22825822	22828564	PIP5K2A	-
chr10	23003183	23003930	23003515		135	1410.04	73.95	0	42		-12	22856586	23003503	PIP5K2A	-
chr10	23384353	23384891	23384540		54	495.82	57.22	0	24		27	23384513	23409899	MSRB2	+
chr10	23481595	23482204	23481930		66	688.49	94.95	0	33		674	23481256	23483181	PTF1A	+
chr10	23727540	23729195	23728095		186	1552.55	80.99	0	43		-103	23728198	23731310	OTUD1	+
chr10	25011444	25012020	25011775		53	491.2	61.13	0	25		-86	25010941	25011689	ARHGAP21	-
chr10	25012052	25012965	25012285		105	852.87	54.71	0	34		-109	24959268	25012176	ARHGAP21	-
chr10	25098036	25098139	25098095		14	165.57	12.82	0.06	14		-85919	24959268	25012176	ARHGAP21	-
chr10	25305263	25306055	25305925		128	1154	57.24	0	41		338	25305587	25315593	THNSL1	+
chr10	25463722	25464192	25463955		24	188.12	27.93	0.04	10		-36	25463991	25891155	GPR158	+
chr10	26223838	26224022	26223945		11	104.05	27.93	0.2	10		742	26223203	26312410	MYO3A	+
chr10	26505132	26505474	26505275		24	220.35	44.68	0.03	16		39	26505236	26593487	GAD2	+
chr10	26855838	26856391	26856195		28	204.15	30.72	0.03	11		5323	26850872	26856155	APBB1IP	+
chr10	26911340	26911711	26911550		22	187.93	41.89	0.04	15		60678	26850872	26856155	APBB1IP	+
chr10	27149165	27149731	27149255		25	119.97	16.64	0.16	10		537	27037499	27149792	ABI1	-
chr10	27529303	27530159	27529745		58	449.93	46.46	0	17		-1	27484146	27529744	ACBD5	-
chr10	28031121	28031467	28031230		22	151.85	26.41	0.07	14		1060	28007492	28032290	MKX	-
chr10	28287570	28288095	28287855		46	248.57	22.5	0	23		122	28247800	28287977	ARMC4	-
chr10	28591599	28592089	28591940		47	463.73	66.69	0	24		-20905	28413001	28571035	MPP7	-
chr10	28821918	28822560	28822100		52	387.41	22.64	0	12		-142	28822242	28909472	WAC	+
chr10	28957524	28957984	28957745		26	213.2	44.68	0.03	16		-8526	28966271	28971868	BAMBI	+
chr10	28965998	28966552	28966275		51	502.24	64.23	0	22		4	28966271	28971868	BAMBI	+
chr10	29350437	29350601	29350525		15	74.02	10.89	0.57	15		215188	29135337	29170827	C10orf126	+
chr10	30024399	30025098	30024895		41	169.16	13.35	0.06	13		815	29975482	30025710	SVIL	-
chr10	30025599	30026119	30025985		71	736.51	57.22	0	26		-275	29975482	30025710	SVIL	-
chr10	30347712	30348685	30348460		59	389.61	42.87	0	19		-11660	30303384	30336800	KIAA1462	-
chr10	30722686	30723716	30723085		173	1858.53	73.36	0	35		-88	30723173	30728371	MAP3K8	+
chr10	31073756	31074061	31073895		19	111.26	18.86	0.16	14		65402	31133567	31139297	ZNF438	-
chr10	31320496	31321050	31320880		39	330.45	38.51	0	13		-26	31133710	31320854	ZNF438	-
chr10	31608223	31609003	31608830		50	318	27.5	0	16		661	31608169	31676124	ZEB1	+
chr10	31892177	31892773	31892465		61	609.38	64.23	0	23		205014	32095219	32097479	ARHGAP12	-
chr10	32217021	32218006	32217205		118	1238.91	74.28	0	27		530	32095234	32217735	ARHGAP12	-
chr10	32345077	32345556	32345335		34	154.44	14.79	0.07	14		24	32297938	32345359	KIF5B	-
chr10	32635040	32635450	32635315		23	80.64	12.66	0.44	12		432	32570787	32635747	EPC1	-
chr10	32635954	32636646	32636200		77	541.48	46.53	0	36		-54	32634040	32636146	EPC1	-
chr10	32734807	32735314	32735045		42	241.25	30.19	0	27		-23	32735068	32863492	CCDC7	+
chr10	33246290	33247600	33246815		127	942.34	41.22	0	25		309	33221449	33247124	ITGB1	-
chr10	33294550	33294942	33294760		39	362.89	55.02	0	25		-40	33218752	33294720	ITGB1	-
chr10	33623681	33624660	33624160		75	656.95	55.85	0	20		-327	33502239	33623833	NRP1	-
chr10	33625095	33626166	33625645		115	1162.28	103.32	0	34		-1812	33502239	33623833	NRP1	-
chr10	35103377	35103784	35103690		37	331.34	37.41	0	16		453	34601280	35104143	PARD3	-
chr10	35103850	35104880	35104365		245	2602.74	142.32	0	98		-116	34601184	35104249	PARD3	-
chr10	35415581	35416488	35415985		168	1908.85	112.24	0	51		-45	35416030	35443356	CREM	+
chr10	35625247	35626347	35625485		129	1018.76	48.42	0	33		-317	35625802	35860852	CCNY	+
chr10	35929421	35930452	35929975		166	1647.28	86.27	0	48		387	35927177	35930362	FZD8	-
chr10	35930491	35931735	35931185		84	515.44	31.69	0	18		-823	35927177	35930362	FZD8	-
chr10	35932066	35932691	35932335		40	241.94	26.41	0	15		-1973	35927177	35930362	FZD8	-
chr10	36111164	36111585	36111375		23	187.61	27.93	0.04	10		-181013	35927177	35930362	FZD8	-
chr10	37151067	37151189	37151135		10	117.48	17.61	0.17	10		-263650	37414785	37521495	ANKRD30A	+
chr10	38146384	38146921	38146685		29	201.42	26.41	0.03	11		-147	38117693	38146538	ZNF248	-
chr10	38299744	38300236	38299995		46	369.21	33.45	0	19		368	38299627	38343466	ZNF33A	+
chr10	38691426	38692035	38691645		40	258.51	32.22	0	18		92	38679763	38691737	RP11-291L22.2	-
chr10	43572219	43573104	43572735		68	421.46	29.34	0	19		208	43572527	43622900	RET	+
chr10	43633779	43634290	43633965		52	492.54	57.92	0	24		31	43633934	43657669	CSGALNACT2	+
chr10	43724651	43725043	43724855		21	129.62	20.76	0.13	12		332	43689983	43725187	RASGEF1A	-
chr10	43762212	43762728	43762555		34	260.55	26.41	0	12		-188	43689984	43762367	RASGEF1A	-
chr10	43891943	43892343	43892175		35	308.97	50.62	0	22		90	43883091	43892265	HNRNPF	-
chr10	43892370	43893055	43892815		95	996.26	107.6	0	43		-89	43883037	43892726	HNRNPF	-
chr10	43902588	43902931	43902715		40	330.14	38.15	0	25		552	43881065	43903267	HNRNPF	-
chr10	43903182	43903365	43903260		11	66.42	12.58	0.99	10		7	43881065	43903267	HNRNPF	-
chr10	43904313	43904908	43904680		59	499.35	46.11	0	21		-66	43881470	43904614	HNRNPF	-
chr10	43915787	43916660	43916035		143	1323.85	101.24	0	68		-11339	43881065	43904696	HNRNPF	-
chr10	43932044	43932616	43932265		46	321.28	36.99	0	21		-98	43932363	43977100	ZNF487	+
chr10	43950773	43951458	43951045		49	365.02	28.18	0	14		18439	43932606	43971278	ZNF487	+
chr10	44047409	44047503	44047460		11	190.16	19.37	0.04	11		16447	44051792	44063907	ZNF239	-
chr10	44144082	44144479	44144245		31	209.27	24.94	0.03	16		59	44139307	44144304	ZNF32	-
chr10	44185562	44185890	44185785		23	87.31	12.31	0.36	17		-41481	44139307	44144304	ZNF32	-
chr10	44806362	44806854	44806705		49	447.51	45.57	0	21		73786	44871315	44880491	CXCL12	-
chr10	45084610	45084890	45084805		14	103.63	22.57	0.2	10		-202864	44874005	44881941	CXCL12	-
chr10	45869268	45869872	45869705		42	214.15	28.93	0.03	23		30	45869675	45941561	ALOX5	+
chr10	46090053	46090587	46090450		51	318	22.37	0	19		25925	46113213	46116375	ANUBL1	-
chr10	46167607	46168383	46168055		169	1870.73	82.08	0	45		145	46111047	46168200	ANUBL1	-
chr10	46762732	46763114	46762915		12	69.37	27.93	0.82	10		-87347	46657899	46675568	AL450334.3	-
chr10	46913745	46914285	46914095		73	500.2	23.81	0	25		-377	46914472	46923688	FAM35B	+
chr10	46951280	46951811	46951515		56	257.3	21.41	0	30		15926	46955444	46967441	SYT15	-
chr10	47395790	47396322	47396095		84	696.7	45.75	0	39		-152621	47191778	47243474	AGAP10	-
chr10	47653991	47654608	47654435		59	333.55	25.43	0	26		-92501	47746936	47763041	ANXA8L2	+
chr10	47655616	47656285	47655825		58	542.09	37.35	0	14		-91111	47746936	47763041	ANXA8L2	+
chr10	48185501	48185894	48185665		22	124.35	19.07	0.15	13		-3947	48189612	48237508	CTGLF6	+
chr10	48277715	48278095	48277915		21	153.02	28.61	0.07	12		1236	48276679	48279171	AL591684.2	+
chr10	48354982	48355227	48355065		14	98.46	23.82	0.24	10		-36	48355101	48373866	ZNF488	+
chr10	49514262	49515330	49514485		123	996.98	43.92	0	27		-248	49514733	49647403	MAPK8	+
chr10	49731898	49732628	49732095		47	226.33	16.35	0.03	12		186	49654079	49732281	ARHGAP22	-
chr10	49864229	49864572	49864470		28	189.05	25.74	0.04	16		-4104	49790766	49860366	ARHGAP22	-
chr10	50323439	50323743	50323545		16	73.31	13.83	0.62	11		9	50310217	50323554	C10orf72	-
chr10	50970170	50970641	50970425		25	168.57	24.93	0.06	11		-3803	50964636	50966622	OGDHL	-
chr10	51488811	51489596	51489055		78	523.79	37.73	0	28		-2456	51464151	51486599	AGAP7	-
chr10	51572048	51572790	51572575		85	571.82	29.71	0	27		148	51572427	51590734	NCOA4	+
chr10	52383143	52383784	52383705		49	215.1	20.72	0.03	22		-115373	52499078	52516948	ASAH2B	+
chr10	52384393	52384902	52384735		37	165.12	19.75	0.06	21		-114343	52499078	52516948	ASAH2B	+
chr10	53361432	53361566	53361500		15	92.31	8.91	0.29	15		97855	53455247	53459355	CSTF2T	-
chr10	57391053	57391414	57391180		21	122.66	17.61	0.16	11		-311806	56138583	57079374	PCDH15	-
chr10	57455253	57455351	57455305		12	140.65	10.46	0.11	12		-375931	56138583	57079374	PCDH15	-
chr10	60027426	60028084	60027775		101	991.96	82.75	0	46		-81	59951278	60027694	IPMK	-
chr10	60028716	60029700	60028925		72	269.9	18.41	0	23		-13	60028938	60048108	CISD1	+
chr10	60094629	60095030	60094855		24	113.6	13.2	0.16	12		120	60094735	60129403	UBE2D1	+
chr10	60272318	60273157	60272815		123	919.59	35.92	0	34		-85	60272900	60591195	BICC1	+
chr10	61122281	61122486	61122365		15	135.36	36.3	0.12	13		94	61060912	61122459	FAM13C	-
chr10	61469627	61469960	61469865		19	161.89	30.72	0.06	11		-28	61410523	61469837	SLC16A9	-
chr10	61665889	61666907	61666565		87	726.59	41.82	0	19		-257	61548521	61666308	CCDC6	-
chr10	62703588	62704242	62704035		80	775.91	68.23	0	30		-55808	62636876	62648227	RHOBTB1	-
chr10	62760652	62761533	62760855		62	463.37	35.21	0	16		-112628	62636876	62648227	RHOBTB1	-
chr10	63422508	63423129	63422625		48	336.07	35.21	0	20		-130	63422755	63450378	C10orf107	+
chr10	63659722	63660317	63660140		26	164.29	25.15	0.06	10		-919	63661059	63856703	ARID5B	+
chr10	63662895	63663402	63663075		51	511.48	64.02	0	24		1632	63661443	63810870	ARID5B	+
chr10	63808807	63809307	63809015		29	209.9	24.21	0.03	11		45	63808970	63852823	ARID5B	+
chr10	64028309	64028714	64028505		25	91.24	12.8	0.32	15		-39	63997916	64028466	RTKN2	-
chr10	64133808	64134289	64134055		33	218.34	33.45	0.03	20		-57	64134112	64162217	ZNF365	+
chr10	64564412	64565581	64564605		134	749.18	38.62	0	46		89	64564516	64568238	ADO	+
chr10	64576886	64577239	64577015		27	227.85	33.01	0.03	15		-889	64571763	64576126	EGR2	-
chr10	64577473	64578104	64577975		56	283.74	29.34	0	30		952	64573434	64578927	EGR2	-
chr10	65224812	65226135	65225775		120	1128.08	69.81	0	25		-55348	65281123	65381969	REEP3	+
chr10	65280751	65281980	65281735		247	2801.72	98.04	0	48		562	65281173	65384881	REEP3	+
chr10	65389748	65390640	65390225		104	1095.96	96.29	0	35		7057	65383168	65384335	AC022387.1	+
chr10	69644037	69645230	69644730		211	1873.49	69.17	0	53		303	69644427	69678147	SIRT1	+
chr10	69834668	69835158	69835075		31	173.93	17.61	0.05	11		-61	69793757	69835014	HERC4	-
chr10	69990868	69991671	69991395		93	722.49	46.71	0	33		460	69990386	69991855	ATOH7	-
chr10	70166749	70167164	70167005		33	162.6	14.65	0.06	16		-59	70138319	70166946	RUFY2	-
chr10	70286900	70287678	70287355		68	358.38	20.57	0	20		-124	70242521	70287231	SLC25A16	-
chr10	70321117	70321510	70321315		34	265.25	38.15	0	22		902	70320413	70454239	TET1	+
chr10	70476751	70476914	70476835		10	65.93	14.44	1.04	10		-4136	70480971	70552134	CCAR1	+
chr10	70586829	70588300	70587295		143	1063.83	38.88	0	24		-304	70587599	70652815	STOX1	+
chr10	70660402	70660765	70660680		24	119.97	13.89	0.16	13		-354	70661034	70706603	DDX50	+
chr10	70660911	70661290	70661085		19	93.07	19.07	0.28	13		12	70661073	70672986	DDX50	+
chr10	70883695	70884432	70884085		71	555.4	49.1	0	29		83	70884002	70928384	VPS26A	+
chr10	71078220	71078895	71078515		88	728.36	35.21	0	24		-85	71078600	71161638	HK1	+
chr10	71210963	71211414	71211265		26	213.72	33.01	0.03	12		36	71211229	71267425	TSPAN15	+
chr10	71561461	71561877	71561765		23	177.3	27.93	0.05	10		78	71561687	71718656	COL13A1	+
chr10	71562042	71562875	71562285		76	705.96	98.7	0	37		597	71561688	71718904	COL13A1	+
chr10	71905113	71906273	71905515		98	798.73	57.22	0	26		827	71897737	71906342	TYSND1	-
chr10	71992750	71993518	71993155		79	541.19	35.21	0	28		-62	71969951	71993093	PPA1	-
chr10	72142184	72142662	72142385		55	542.07	65.46	0	29		-3	72058732	72142382	LRRC20	-
chr10	72163689	72164472	72164175		56	444.8	34.51	0	15		40	72164135	72188374	EIF4EBP2	+
chr10	72217960	72218522	72218175		29	149.38	17.61	0.07	11		-10468	72192505	72207707	NODAL	-
chr10	72238005	72238961	72238710		78	500.25	30.81	0	21		146	72238564	72328205	KIAA1274	+
chr10	72431922	72432781	72432345		49	250.52	22.01	0	14		-214	72432559	72522197	ADAMTS14	+
chr10	72575531	72576408	72576055		56	358.29	24.65	0	14		329	72575726	72640930	SGPL1	+
chr10	72647658	72648007	72647815		17	80.26	12.58	0.44	10		196	72643689	72648011	PCBD1	-
chr10	72648036	72648571	72648345		45	310.57	37.75	0	24		196	72643267	72648541	PCBD1	-
chr10	72972009	72972891	72972420		208	2231.43	96.84	0	65		93	72972327	73062621	UNC5B	+
chr10	73078819	73079651	73079035		96	523.16	44.81	0	55		-4	73079039	73082811	SLC29A3	+
chr10	73156645	73157314	73156955		52	398.73	27.52	0	14		251	73156704	73501741	CDH23	+
chr10	73533027	73533516	73533365		30	223.4	24.21	0.03	11		-110	73507316	73533255	C10orf54	-
chr10	73648661	73649082	73648885		45	321.28	34.67	0	28		-37803	73576058	73611082	PSAP	-
chr10	73723959	73724877	73724210		76	532.19	37.22	0	21		87	73724123	73773322	CHST3	+
chr10	73975573	73975963	73975775		13	61.56	17.21	1.35	10		-12	73975787	73993373	C10orf104	+
chr10	74032591	74033013	74032825		29	162.78	24.83	0.06	20		-853	74033678	74035794	DDIT4	+
chr10	74033175	74033914	74033710		49	366.68	39.38	0	16		32	74033678	74035794	DDIT4	+
chr10	74076827	74077068	74076940		13	57.31	10.76	1.66	11		19683	74095315	74096623	DNAJB12	-
chr10	74079255	74080040	74079520		79	564.69	45.67	0	30		17103	74095315	74096623	DNAJB12	-
chr10	74091531	74092134	74091885		78	729.58	45.93	0	24		4738	74095315	74096623	DNAJB12	-
chr10	74856164	74856926	74856745		47	278.9	21.83	0	13		-13472	74870217	74891586	NUDT13	+
chr10	74964609	74964780	74964685		25	280.66	52.82	0	23		-3765	74968450	75001938	FAM149B1	+
chr10	75173278	75173959	75173475		60	492.08	42.03	0	21		350	75135203	75173825	ANXA7	-
chr10	75255315	75255709	75255485		24	181.88	37.41	0.04	17		297	75204358	75255782	PPP3CB	-
chr10	75531935	75532988	75532725		114	625.18	31.69	0	36		403	75532322	75534881	FUT11	+
chr10	75571078	75571739	75571385		37	228.53	21.37	0.03	10		-2551	75568225	75568834	NDST2	-
chr10	75633729	75634368	75634265		52	305.06	28.93	0	23		47	75574174	75634312	CAMK2G	-
chr10	75757497	75758373	75757965		49	308.52	27.91	0	13		91	75757874	75865050	VCL	+
chr10	75936131	75936865	75936595		108	753.5	30.5	0	32		151	75936444	76469061	ADK	+
chr10	76584905	76585879	76585305		143	1548.58	80.9	0	34		-35	76585340	76792051	MYST4	+
chr10	76871027	76871590	76871265		38	205.19	17.38	0.03	14		36	76871229	76936589	SAMD8	+
chr10	76970051	76970895	76970260		56	356.7	28.17	0	16		-249	76970509	76991206	VDAC2	+
chr10	76970051	76970895	76970465		56	356.7	28.17	0	16		-44	76970509	76991206	VDAC2	+
chr10	76994248	76995039	76994505		59	220.17	14.72	0.03	19		589	76994184	76995094	COMTD1	-
chr10	76995158	76995931	76995665		54	359.55	37.73	0	21		-177	76993729	76995488	COMTD1	-
chr10	77054515	77055255	77054905		105	786.66	36.97	0	34		-59117	76995073	76995788	COMTD1	-
chr10	77155706	77156307	77155895		26	58.39	9.6	1.55	12		-4864	77160759	77161385	AC010997.1	+
chr10	77158389	77159573	77159020		107	614.4	29.71	0	27		-1739	77160759	77161385	AC010997.1	+
chr10	77160917	77162084	77161645		129	1164.15	73.36	0	35		-135	77157588	77161510	ZNF503	-
chr10	77162090	77162851	77162180		65	530.75	54.17	0	22		-475	77162655	77167453	C10orf41	+
chr10	77163450	77163866	77163655		31	265.34	47.59	0	20		-20	77163675	77167716	C10orf41	+
chr10	77163878	77164848	77164095		65	450.42	44.02	0	19		420	77163675	77167716	C10orf41	+
chr10	77164910	77165482	77165235		45	310.57	21.86	0	13		1560	77163675	77167716	C10orf41	+
chr10	77167683	77168274	77168065		87	943.51	111.2	0	48		4390	77163675	77167716	C10orf41	+
chr10	77168758	77169311	77168885		30	130.75	14.63	0.13	12		5210	77163675	77167716	C10orf41	+
chr10	77469051	77469258	77469170		13	61.56	10.07	1.35	11		-73349	77542519	78317133	C10orf11	+
chr10	79397161	79398273	79397365		51	219.33	14.67	0.03	10		386	79395957	79397751	KCNMA1	-
chr10	79686049	79687110	79686855		65	315.07	14.69	0	11		58223	79729008	79745078	POLR3A	-
chr10	80062665	80063651	80063105		102	758.25	41.08	0	28		263749	79799356	79800455	RPS24	+
chr10	80732919	80733858	80733385		80	685.95	46.33	0	20		-95407	80828792	81076276	ZMIZ1	+
chr10	80827007	80827457	80827265		32	266.95	45.21	0	19		-1527	80828792	81076276	ZMIZ1	+
chr10	80828360	80829494	80828875		139	1354.8	79.23	0	35		83	80828792	81053542	ZMIZ1	+
chr10	80829949	80830950	80830305		56	368.32	24.21	0	11		1513	80828792	81053542	ZMIZ1	+
chr10	80829949	80830950	80830525		56	368.32	24.21	0	11		1733	80828792	81053542	ZMIZ1	+
chr10	80980892	80981166	80981090		14	69.21	12.1	0.81	10		-22336	81003426	81050842	ZMIZ1	+
chr10	81001872	81002328	81002065		35	279.22	34.8	0	18		-1361	81003426	81050842	ZMIZ1	+
chr10	81002332	81003889	81002625		267	2529.08	82.29	0	55		-801	81003426	81050842	ZMIZ1	+
chr10	81107059	81107578	81107355		38	205.19	17.17	0.03	15		99	81107256	81109791	PPIF	+
chr10	81204935	81205832	81205345		121	1064	77.47	0	49		38	81142081	81205383	ZCCHC24	-
chr10	81664364	81664816	81664605		20	74.84	12.1	0.57	11		-57	81664662	81667610	AL512662.1	+
chr10	81741378	81741752	81741550		14	99.15	27.93	0.25	10		820	81701205	81742370	SFTPD	-
chr10	81964664	81965535	81965060		70	317.99	14.97	0	16		218	81932590	81965278	ANXA11	-
chr10	82213548	82214553	82213940		93	795.42	53.14	0	24		-127	82214067	82281515	TSPAN14	+
chr10	85954201	85954703	85954425		34	296.12	30.26	0	10		11	85954414	85977122	PCDH21	+
chr10	86088099	86088854	86088450		68	525.05	31.69	0	17		31	86088419	86278273	FAM190	+
chr10	88125709	88126892	88126375		79	544.67	33.54	0	16		77414	88195013	88203789	WAPAL	-
chr10	88159659	88160505	88160200		100	804.86	46.23	0	30		43589	88195013	88203789	WAPAL	-
chr10	88281476	88282122	88281990		34	241.01	28.48	0	10		-465	88195014	88281525	WAPAL	-
chr10	88470820	88471678	88471045		82	703.15	42.94	0	20		-6821	88477866	88495010	LDB3	+
chr10	88471745	88472042	88471835		16	85.7	22.89	0.38	12		-6031	88477866	88495010	LDB3	+
chr10	88515354	88517226	88516105		305	3100	168.06	0	62		-291	88516396	88684942	BMPR1A	+
chr10	88718277	88718527	88718385		17	62.18	7.45	1.25	11		-28	88718413	88723017	SNCG	+
chr10	88853790	88855529	88854755		140	1172.48	50.3	0	20		-198	88854953	88951220	FAM35A	+
chr10	88963237	88963711	88963460		31	223.3	37.17	0.03	18		12468	88971898	88975928	AL157893.1	-
chr10	89102499	89103006	89102730		32	154.44	17.89	0.07	16		-14695	89117425	89126948	FAM22D	+
chr10	89264341	89265516	89264705		96	833.23	69.88	0	26		73	89264632	89313145	MINPP1	+
chr10	89419191	89419822	89419425		84	926.24	69.55	0	24		-51	89419476	89507460	PAPSS2	+
chr10	89577815	89578191	89578055		29	273.51	64.23	0	21		-67	89544344	89577988	ATAD1	-
chr10	89622827	89624133	89623255		126	1115.22	62.13	0	27		385	89622870	89731687	PTEN	+
chr10	90639778	90640718	90640435		177	1690.48	67.65	0	49		454	90639981	90653670	STAMBPL1	+
chr10	90750920	90751190	90751125		14	98.46	26.24	0.24	11		80	90751045	90773934	FAS	+
chr10	91404098	91405109	91404280		81	656.52	44.02	0	20		935	91342749	91405215	PANK1	-
chr10	92617278	92618077	92617905		116	988.24	45.07	0	32		-450	92500580	92617455	HTR7	-
chr10	92922191	92923699	92922635		143	1354.79	80.98	0	28		-57273	92979908	92987131	PCGF5	+
chr10	92980199	92980677	92980455		46	332.08	28.11	0	20		-85	92980540	92987717	PCGF5	+
chr10	93169782	93170539	93170145		107	1112.88	63.82	0	29		43	93170102	93274518	HECTD2	+
chr10	93647061	93647396	93647215		17	126.86	26.17	0.14	11		22025	93666346	93669240	FGFBP3	-
chr10	93668201	93668906	93668435		42	340.92	39.1	0	14		805	93666346	93669240	FGFBP3	-
chr10	93999233	94000042	93999515		164	1321.2	51.7	0	58		51329	93809388	94050844	CPEB3	-
chr10	94050621	94051263	94050815		45	248.54	21.38	0	17		-105	94050920	94113721	MARCH5	+
chr10	94333288	94334116	94333555		74	666.01	48.65	0	20		-19488	94353043	94415150	KIF11	+
chr10	94351222	94351752	94351525		34	170.88	17.53	0.06	14		-1518	94353043	94415150	KIF11	+
chr10	94449117	94450528	94449760		118	913.75	45.58	0	19		48	94449712	94455397	HHEX	+
chr10	94449117	94450528	94450280		118	913.75	45.58	0	19		568	94449712	94455397	HHEX	+
chr10	94833534	94833843	94833695		19	167.96	30.72	0.06	11		48	94833647	94837647	CYP26A1	+
chr10	95052225	95052330	95052285		28	55.6	2.61	1.79	28		31147	95082875	95083432	MYOF	-
chr10	95462155	95462510	95462275		35	355.3	58.69	0	21		54	95433514	95462329	C10orf4	-
chr10	95653484	95654123	95653755		68	635.03	77.03	0	35		-4	95653759	95715819	TMEM20	+
chr10	95753335	95754147	95753725		99	1003.58	64.41	0	26		-21	95753746	96088149	PLCE1	+
chr10	96122677	96122950	96122830		16	123.23	30.06	0.16	14		-114	96121081	96122716	NOC3L	-
chr10	96162030	96163237	96162890		105	706.67	30.81	0	21		629	96162261	96295687	TBC1D12	+
chr10	96943145	96943859	96943640		52	273.93	23.89	0	19		-10317	96953957	96986162	C10orf129	+
chr10	97050451	97051224	97050745		80	733.59	50.62	0	22		24	96997767	97050769	PDLIM1	-
chr10	97320848	97321479	97321095		79	564.69	36.72	0	33		55359	97371013	97376454	ALDH18A1	-
chr10	97667055	97667873	97667325		43	196.9	17.3	0.03	11		-340	97667665	97793507	C10orf131	+
chr10	97803049	97803688	97803180		63	569.91	37.41	0	17		-160	97803340	97820627	CCNJ	+
chr10	98273164	98273987	98273675		99	1063.88	100.53	0	36		-7	98124363	98273668	TLL2	-
chr10	98346134	98347124	98346735		200	2351.6	115.59	0	53		-219	98336102	98346516	TM9SF3	-
chr10	98480070	98480650	98480260		38	273.06	28.01	0	14		-19625	98388155	98460635	PIK3AP1	-
chr10	98591687	98593065	98591870		285	3100	93.07	0	45		-169	98592039	98718690	LCOR	+
chr10	98945252	98945854	98945755		44	309.68	22.89	0	13		-78	98817499	98945677	SLIT1	-
chr10	99051868	99052210	99052080		21	74.15	8.3	0.57	11		300	98981930	99052380	ARHGAP19	-
chr10	99078922	99079979	99079045		91	687.87	42.84	0	23		-53	99079098	99081097	FRAT1	+
chr10	99093586	99095098	99093965		250	2145.57	45.27	0	36		493	99092255	99094458	FRAT2	-
chr10	99185608	99186134	99185855		38	268.37	35.21	0	20		-62	99185917	99193198	PGAM1	+
chr10	99205821	99206166	99205965		19	139.93	26.41	0.11	12		-4	99205969	99215775	ZDHHC16	+
chr10	99257463	99257774	99257595		20	179.59	39.1	0.04	14		561	99236486	99258156	MMS19	-
chr10	99257826	99258812	99258535		88	811.02	92.15	0	32		-331	99236674	99258204	MMS19	-
chr10	99259163	99259488	99259295		15	118.25	27.93	0.17	10		670	99258625	99330966	UBTD1	+
chr10	99446717	99447513	99447365		118	913.75	61.98	0	53		-285	99437181	99447080	AVPI1	-
chr10	99473328	99474580	99473705		258	3056.95	107.84	0	46		224	99473481	99477907	MARVELD1	+
chr10	99789963	99790468	99790315		36	322.3	53.06	0	19		270	99639440	99790585	CRTAC1	-
chr10	99790517	99790710	99790600		12	78.12	18.79	0.5	10		-15	99639440	99790585	CRTAC1	-
chr10	101088922	101090453	101089140		111	858.01	61.13	0	23		-5	101089145	101154085	CNNM1	+
chr10	101380439	101381439	101380665		124	1327.04	106.12	0	37		-130	101371057	101380535	SLC25A28	-
chr10	101769263	101770022	101769735		116	1249.09	84.75	0	38		55416	101808524	101825151	CPN1	-
chr10	101945485	101946064	101945805		97	975.48	95.31	0	55		-19	101914617	101945786	ERLIN1	-
chr10	102106053	102107213	102106305		155	1549.74	123.25	0	56		-572	102106877	102116367	SCD	+
chr10	102242304	102242616	102242425		15	105.72	26.41	0.2	12		6638	102246403	102249063	SEC31B	-
chr10	102413850	102414240	102414055		18	138.21	33.51	0.12	12		-91413	102505468	102589698	PAX2	+
chr10	102414253	102414747	102414520		31	263.87	53.06	0	19		-90948	102505468	102589698	PAX2	+
chr10	102414759	102415110	102415005		23	148.74	23.24	0.07	15		-90463	102505468	102589698	PAX2	+
chr10	102415433	102415740	102415605		15	77.13	13.56	0.51	10		-89863	102505468	102589698	PAX2	+
chr10	102469803	102470339	102470115		45	321.28	23.64	0	15		-35353	102505468	102589698	PAX2	+
chr10	102504224	102504512	102504345		25	228.39	43.25	0.03	17		-1123	102505468	102589698	PAX2	+
chr10	102505325	102506073	102505415		46	321.28	30.77	0	14		-53	102505468	102589698	PAX2	+
chr10	102672229	102672601	102672505		26	212.96	40.24	0.03	14		-215	102672720	102724893	FAM178A	+
chr10	102758795	102759723	102759025		72	543.35	38.85	0	19		-208	102759233	102767593	LZTS2	+
chr10	102778619	102779067	102778815		33	199.59	19.76	0.03	15		-189	102771715	102778626	PDZD7	-
chr10	102820675	102821328	102821105		80	870.83	92.15	0	31		106	102820999	102827810	KAZALD1	+
chr10	102821698	102822987	102822545		200	1441.92	51.84	0	53		246	102822299	102827888	KAZALD1	+
chr10	102825597	102826563	102826070		78	643.69	49.66	0	22		14	102826056	102827888	KAZALD1	+
chr10	102996015	102996653	102996250		35	227.62	25.77	0.03	12		-7533	102986733	102988717	LBX1	-
chr10	103051932	103052870	103052115		66	516.34	45.27	0	17		-61705	103113820	103317078	BTRC	+
chr10	103051932	103052870	103052355		66	516.34	45.27	0	17		-61465	103113820	103317078	BTRC	+
chr10	103124540	103124740	103124620		31	120.87	10.62	0.16	30		10329	103114291	103285840	BTRC	+
chr10	103326096	103326344	103326265		13	76.65	14.67	0.53	10		-4052	103330317	103356408	DPCD	+
chr10	103453982	103454535	103454325		34	199.59	22.76	0.03	13		145	103427643	103454470	FBXW4	-
chr10	103454735	103455157	103454945		33	275.57	49.96	0	21		71	103370426	103455016	FBXW4	-
chr10	103539578	103539977	103539795		20	83.92	11	0.39	10		2610	103541484	103542405	NPM3	-
chr10	103590189	103590916	103590475		112	866.99	44.86	0	40		-280	103587110	103590195	KCNIP2	-
chr10	103824828	103825943	103825050		99	757.52	56.98	0	28		-97	103825147	103827790	HPS6	+
chr10	103877058	103877943	103877405		53	301.44	21.84	0	15		2800	103870387	103880205	LDB1	-
chr10	103879606	103880745	103880145		224	1591.39	38.88	0	54		60	103870387	103880205	LDB1	-
chr10	103893310	103893596	103893460		15	86.06	14.67	0.38	10		673	103892787	103910088	PPRC1	+
chr10	103989637	103990127	103989725		23	147.7	33.31	0.08	13		3640	103986085	103989346	ELOVL3	+
chr10	103990149	103990964	103990455		115	975.74	50.28	0	35		4370	103986085	103989346	ELOVL3	+
chr10	104154282	104154787	104154585		35	209.12	19.3	0.03	13		231	104154354	104162281	NFKB2	+
chr10	104159006	104159560	104159425		74	820.21	93.37	0	35		-910	104160335	104161026	NFKB2	+
chr10	104209945	104210877	104210365		203	1621.34	50.1	0	61		837	104209574	104211202	C10orf95	-
chr10	104220954	104221321	104221080		27	248.97	41.27	0	15		-90	104221170	104239450	TMEM180	+
chr10	104402778	104402990	104402865		13	108.85	24.83	0.17	11		-1387	104404252	104418074	TRIM8	+
chr10	104403104	104403292	104403220		13	100.09	25.15	0.23	11		-1032	104404252	104418074	TRIM8	+
chr10	104403431	104405194	104404755		321	2686.08	72.63	0	66		502	104404253	104418164	TRIM8	+
chr10	104473820	104474782	104474120		65	380.38	26.41	0	18		-177	104474297	104498951	SFXN2	+
chr10	104629087	104629507	104629255		29	193.65	24.65	0.03	14		-18	104629273	104661656	AS3MT	+
chr10	104645132	104645304	104645260		11	95.42	22.01	0.26	10		15987	104629273	104661656	AS3MT	+
chr10	104677257	104677595	104677445		15	115.75	27.93	0.16	10		-626	104678071	104838344	CNNM2	+
chr10	104952469	104953339	104953025		190	2347.27	125.1	0	53		30	104871502	104953055	NT5C2	-
chr10	105037003	105037636	105037380		36	194.8	16.14	0.03	11		460	105036920	105050108	INA	+
chr10	105110636	105110963	105110845		18	133.49	33.01	0.13	15		-9	105062553	105110836	PCGF6	-
chr10	105212071	105212468	105212235		20	120.34	22.77	0.16	13		-76	105206543	105212159	CALHM2	-
chr10	105314820	105315285	105314925		48	247.57	22.15	0	27		-64	105314989	105331579	NEURL	+
chr10	105452773	105453023	105452925		50	649.16	109.37	0	40		456	105359277	105453381	SH3PXD2A	-
chr10	105677680	105678077	105677920		26	229.35	41.89	0.02	15		-32	105642313	105677888	OBFC1	-
chr10	105726682	105727495	105726920		111	936.78	57.22	0	36		-39	105726959	105788991	SLK	+
chr10	105881323	105882050	105881665		87	589.6	30.98	0	29		-151	105881816	105886143	C10orf78	+
chr10	105991816	105992250	105992050		24	86.93	13.2	0.37	15		13	105952252	105992063	C10orf79	-
chr10	106444382	106444629	106444565		13	61.56	13.1	1.35	12		43706	106400859	107024993	SORCS3	+
chr10	108923926	108924782	108924570		117	789.34	38.67	0	40		-489723	108426842	108434847	SORCS1	-
chr10	110494746	110494975	110494855		14	69.21	12.15	0.81	12		1135935	111628394	111630790	XPNPEP1	-
chr10	111572073	111572190	111572135		30	91.51	3.9	0.31	30		58655	111628394	111630790	XPNPEP1	-
chr10	111682705	111683493	111683285		102	910.03	50.36	0	29		-96	111646024	111683189	XPNPEP1	-
chr10	111682705	111683493	111683150		102	910.03	50.36	0	29		39	111646024	111683189	XPNPEP1	-
chr10	111765602	111765935	111765780		23	148.74	26.46	0.07	17		18	111702418	111765798	RP11-451M19.3	-
chr10	111767350	111767589	111767455		18	163.08	39.1	0.06	13		-265	111767720	111893969	ADD3	+
chr10	111767596	111768500	111767945		77	691.83	42.49	0	16		-65	111768010	111877137	ADD3	+
chr10	111967976	111968216	111968070		14	119.35	27.67	0.17	11		503	111967567	112047123	MXI1	+
chr10	111969680	111970019	111969890		21	184.2	41.89	0.04	15		-99	111969989	112046264	MXI1	+
chr10	111970172	111970684	111970595		70	745.45	121.69	0	46		606	111969989	112046264	MXI1	+
chr10	111981449	111982188	111981700		51	378.92	41.82	0	17		-4051	111985751	112046264	MXI1	+
chr10	111985559	111987241	111985965		130	813.79	25.19	0	16		-894	111986859	112044887	MXI1	+
chr10	112257235	112258380	112258085		156	1151.37	39.23	0	35		394	112257691	112266864	DUSP5	+
chr10	112400969	112401283	112401205		15	106.91	27.09	0.19	12		-2906	112404111	112540836	RBM20	+
chr10	112403449	112404570	112403795		233	2334.49	60.67	0	42		-316	112404111	112540836	RBM20	+
chr10	112432167	112432430	112432255		15	77.13	12.78	0.51	10		28100	112404155	112599227	RBM20	+
chr10	112679372	112679937	112679765		33	154.44	13.7	0.07	10		4	112679761	112724487	SHOC2	+
chr10	112836561	112837069	112836845		25	168.57	26.89	0.06	11		55	112836790	112840658	ADRA2A	+
chr10	113943351	113943745	113943565		16	74.74	14.67	0.58	10		-40	113909637	113943525	GPAM	-
chr10	114157750	114157882	114157820		11	117.48	19.37	0.17	11		-11471	114169291	114181384	ACSL5	+
chr10	114709718	114709980	114709800		24	247.81	61.44	0	22		-209	114710009	114926061	TCF7L2	+
chr10	114710980	114711602	114711395		39	314.45	55.85	0	20		720	114710675	114901075	TCF7L2	+
chr10	114886335	114886850	114886515		93	1079.73	84.04	0	36		-17164	114903679	114925415	TCF7L2	+
chr10	115803478	115804162	115803655		45	170.5	10.56	0.06	12		-151	115803806	115806667	ADRB1	+
chr10	116527740	116528194	116528020		38	339.7	49.19	0	18		-53483	116581503	116624472	FAM160B1	+
chr10	116581283	116581995	116581400		51	432.81	55.02	0	20		-129	116581529	116593224	FAM160B1	+
chr10	116852613	116853803	116853145		88	486.1	23.89	0	19		21	116853124	117708496	ATRNL1	+
chr10	118031901	118032291	118032135		15	106.7	27.93	0.19	10		20	118031516	118032155	GFRA1	-
chr10	118032830	118033197	118033085		53	410.13	38.88	0	36		-106	117823275	118032979	GFRA1	-
chr10	118501419	118501829	118501615		25	188.77	30.81	0.04	13		470	118430703	118502085	HSPA12A	-
chr10	118501847	118502418	118502085		57	444.8	40.28	0	24		0	118430703	118502085	HSPA12A	-
chr10	118722497	118722742	118722575		12	88.13	23.82	0.35	11		-2733	118713560	118719842	KIAA1598	-
chr10	118764166	118765154	118764890		109	820.85	40.63	0	28		-14	118644308	118764876	KIAA1598	-
chr10	119134556	119135643	119135060		92	586.21	30.1	0	21		-82	119040000	119134978	PDZD8	-
chr10	119302657	119303331	119303035		71	730.24	72.61	0	26		1079	119301956	119309057	EMX2	+
chr10	119805870	119806638	119806345		101	897.12	67.7	0	39		-231	119764427	119806114	RAB11FIP2	-
chr10	120788695	120790504	120789065		358	3100	92.43	0	42		-873	120789938	120791045	NANOS1	+
chr10	120839449	120840532	120840415		89	803.27	64.23	0	23		-99	120794356	120840316	EIF3A	-
chr10	120863571	120864425	120864080		50	231.14	16.31	0.02	12		451	120863629	120889058	FAM45A	+
chr10	120924899	120925503	120925235		39	319.1	61.44	0	20		-46	120900434	120925189	SFXN4	-
chr10	120966309	120967787	120967335		180	1417.63	41.95	0	29		234	120967101	121093832	GRK5	+
chr10	121301864	121303097	121302305		103	834.18	70.43	0	32		-85	121259437	121302220	RGS10	-
chr10	121410528	121410897	121410735		19	153.61	39.1	0.07	13		-147	121410882	121437331	BAG3	+
chr10	121485088	121486051	121485825		77	543.45	29.93	0	17		256	121485569	121551596	INPP5F	+
chr10	121632072	121632620	121632425		57	588.01	55.85	0	20		-64	121590709	121632361	C10orf119	-
chr10	122216110	122216981	122216355		96	996.91	75.4	0	27		-111	122216466	122349367	PPAPDC1A	+
chr10	122738450	122739515	122739015		102	983.62	89.36	0	32		93635	122645380	122662737	BRWD2	+
chr10	123357441	123358419	123357920		186	2320.47	156.38	0	55		-108	123297480	123357812	FGFR2	-
chr10	123734586	123734993	123734780		18	67.35	11.97	0.92	10		-49	123716656	123734731	NSMCE4A	-
chr10	123872111	123872689	123872365		100	1017.7	74.76	0	43		-180	123872545	123970084	TACC2	+
chr10	124133969	124134903	124134245		86	830.56	69.81	0	24		-107	124134352	124166189	PLEKHA1	+
chr10	124220709	124221721	124221355		169	2032.46	103.32	0	37		268	124221087	124274423	HTRA1	+
chr10	124264068	124264509	124264255		49	522.62	69.81	0	25		-1952	124266207	124274423	HTRA1	+
chr10	124894622	124895026	124894845		32	303.17	53.06	0	19		-722	124895567	124897247	HMX3	+
chr10	125851238	125851990	125851915		52	327.99	28.17	0	16		1183	125805529	125853098	CHST15	-
chr10	125852296	125853339	125852785		55	390.03	33.51	0	12		313	125805529	125853098	CHST15	-
chr10	126106726	126108018	126107125		90	520.17	35.21	0	24		-363	126095925	126106762	OAT	-
chr10	126138452	126138954	126138555		28	226.49	36.3	0.03	13		-11848	126150403	126187083	LHPP	+
chr10	126150287	126150646	126150500		28	145.53	13.69	0.11	14		88	126150412	126302710	LHPP	+
chr10	126432306	126433282	126432955		315	3100	179.59	0	102		-117	126355759	126432838	FAM53B	-
chr10	126480282	126480902	126480410		42	317.57	27.91	0	12		36	126462663	126480446	METTL10	-
chr10	126605102	126605409	126605245		25	241.39	46.09	0	17		-25447	126630692	126676758	ZRANB1	+
chr10	126605455	126606290	126605725		52	414.64	39.1	0	13		-24967	126630692	126676758	ZRANB1	+
chr10	126711878	126712229	126712105		32	154.44	11.62	0.07	14		4354	126677507	126716459	CTBP2	-
chr10	126847253	126849177	126848975		149	1253.48	49.52	0	18		93	126727563	126849068	CTBP2	-
chr10	126849409	126850290	126849965		64	544.25	46.77	0	16		-226	126727566	126849739	CTBP2	-
chr10	127584546	127585249	127585005		40	108.64	8.07	0.17	11		0	127555698	127585005	DHX32	-
chr10	127931613	127931927	127931755		16	131.16	27.73	0.13	10		-87881	127823937	127843874	ADAM12	-
chr10	128593704	128594340	128593925		32	231.27	36.3	0.02	13		-98	128594023	129250780	DOCK1	+
chr10	128994277	128994665	128994450		24	207.48	36.3	0.03	13		-51822	129046272	129142864	DOCK1	+
chr10	128994689	128995003	128994810		15	109.09	27.73	0.17	10		-51462	129046272	129142864	DOCK1	+
chr10	131748200	131748626	131748415		20	151.67	27.51	0.07	10		13676	131633547	131762091	EBF3	-
chr10	131756868	131757552	131757030		35	175.65	14.67	0.05	10		5061	131633547	131762091	EBF3	-
chr10	131761731	131762950	131762675		149	1310.18	61.62	0	34		-137	131760205	131762538	EBF3	-
chr10	131769584	131770252	131770135		70	704.64	72.61	0	25		-7597	131760205	131762538	EBF3	-
chr10	131934466	131934925	131934625		29	88.81	10.8	0.35	16		-38	131934663	131982785	GLRX3	+
chr10	131988346	131988943	131988780		53	338.59	20.12	0	16		11142	131977638	131978646	GLRX3	+
chr10	133795150	133796127	133795560		156	1425.36	107.11	0	71		-125	133781578	133795435	BNIP3	-
chr10	134120994	134121514	134121270		40	368.49	41.89	0	14		174	134020996	134121444	STK32C	-
chr10	134121640	134122373	134122130		50	393.3	41.89	0	14		-686	134020996	134121444	STK32C	-
chr10	134145173	134145989	134145605		116	1324.23	78.19	0	27		-9	134145614	134166899	LRRC27	+
chr10	134145173	134145989	134145765		116	1324.23	78.19	0	27		151	134145614	134166899	LRRC27	+
chr10	134209893	134211037	134210775		101	675.98	49.89	0	34		103	134210672	134231367	PWWP2B	+
chr10	134330736	134331141	134330895		25	190.04	33.01	0.04	15		-20429	134351324	134596979	INPP5A	+
chr10	134350267	134351091	134350755		130	1301.34	81.71	0	46		-569	134351324	134596979	INPP5A	+
chr10	134351145	134351780	134351355		31	153.91	20.53	0.07	11		2	134351353	134522017	INPP5A	+
chr10	134901255	134901754	134901475		37	336.78	39.1	0	14		66	134901409	134945178	GPR123	+
chr10	134973688	134974095	134973945		24	201.1	44.02	0.03	16		-6	134973951	135039916	KNDC1	+
chr10	135043804	135044380	135044045		67	498.12	45.72	0	36		267	135043778	135045062	UTF1	+
chr10	135132009	135132573	135132335		33	242.82	42.28	0	16		7344	135138932	135139679	CALY	-
chr10	135139223	135139792	135139365		26	155.3	22.01	0.06	10		314	135138932	135139679	CALY	-
chr10	135186692	135187462	135187290		105	965.04	75.71	0	43		-97	135175984	135187193	ECHS1	-
chr10	135207474	135208067	135207780		34	210.48	17.61	0.03	10		3	135207777	135234022	MTG1	+
chr11	288776	289318	289095		33	263.54	36.3	0	13		-40	289135	295678	ATHL1	+
chr11	355627	356151	355955		25	101.16	15.02	0.21	11		-13849	369804	382117	B4GALNT4	+
chr11	394170	394753	394350		32	127.93	10.28	0.14	10		133	394217	404908	PKP3	+
chr11	394170	394753	394505		32	127.93	10.28	0.14	10		288	394217	404908	PKP3	+
chr11	406703	407202	406885		41	196.9	12.32	0.03	14		8114	405716	414999	SIGIRR	-
chr11	518496	518892	518730		23	118.68	18.86	0.17	15		-11430	494515	507300	RNH1	-
chr11	535061	535787	535565		50	326.85	31.69	0	17		-226	532517	535339	HRAS	-
chr11	560480	560834	560705		17	113.98	25.15	0.16	12		301	560404	563993	RASSF7	+
chr11	567939	569149	568705		120	916.43	61.46	0	36		7255	561450	564024	RASSF7	+
chr11	575414	576051	575840		35	200.83	19.37	0.03	11		-643	576483	612220	PHRF1	+
chr11	692880	693045	692965		10	94.13	27.51	0.28	10		2082	644225	695047	DEAF1	-
chr11	726238	726933	726575		78	689.7	65.56	0	35		20455	706120	727726	EPS8L2	+
chr11	747073	747538	747440		46	270.31	16.63	0	17		111	747329	765024	TALDO1	+
chr11	776639	777833	777615		97	676.99	38.73	0	21		-131	767225	777484	PDDC1	-
chr11	797737	798634	798260		135	979.35	48.91	0	49		-2039	790475	796221	SLC25A22	-
chr11	804881	805498	805175		50	401.13	34.8	0	16		70	799184	805245	LRDD	-
chr11	830865	831115	830980		26	228.35	35.21	0.03	18		-1863	832843	838829	CD151	+
chr11	832080	833662	833005		151	1214.89	74.34	0	38		162	832843	838829	CD151	+
chr11	842348	843042	842925		50	265.19	25.7	0	20		113	842812	866817	TSPAN4	+
chr11	919176	919459	919360		16	85.31	13.75	0.38	11		-6481	925841	1012240	AP2A2	+
chr11	925503	926072	925795		74	761.46	80.9	0	34		-46	925841	1012240	AP2A2	+
chr11	1330395	1331147	1330665		53	409.26	30.81	0	14		174	1295601	1330839	TOLLIP	-
chr11	1404139	1404753	1404330		41	173.64	15.65	0.05	16		-6799	1411129	1483326	BRSK2	+
chr11	1410596	1411027	1410875		46	396.74	39.93	0	20		-254	1411129	1483326	BRSK2	+
chr11	1411040	1411598	1411370		29	203.15	30.72	0.03	10		239	1411131	1482944	BRSK2	+
chr11	1592368	1592751	1592535		20	120.34	18.59	0.16	11		924	1575281	1593459	DUSP8	-
chr11	1593047	1594396	1593500		126	1159.73	67.32	0	24		-471	1593971	1620414	AP006285.1	+
chr11	1784898	1785388	1785315		24	143.7	20.47	0.1	10		-1682	1778554	1783633	CTSD	-
chr11	1884739	1885025	1884825		19	159.04	34.75	0.06	14		349	1884476	1904658	LSP1	+
chr11	1967933	1968790	1968520		65	361.3	23.89	0	18		12	1968508	1977839	MRPL23	+
chr11	2160294	2160714	2160515		19	143.26	36.3	0.12	13		-1216	2161731	2169872	IGF2AS	+
chr11	2465988	2466804	2466295		61	504.08	38.36	0	15		-257	2466552	2549206	KCNQ1	+
chr11	2721050	2721784	2721545		46	183.31	14.67	0.04	14		178836	2542709	2591895	KCNQ1	+
chr11	2721944	2722189	2722025		17	114.69	23.48	0.16	16		179316	2542709	2591895	KCNQ1	+
chr11	2906195	2906649	2906385		29	232.9	48.02	0.02	18		-428	2904868	2905957	CDKN1C	-
chr11	3012899	3013697	3013270		49	391.03	42.68	0	15		10	2997254	3013280	NAP1L4	-
chr11	3186394	3186726	3186570		20	135.25	21.13	0.12	12		12	3109451	3186582	OSBPL5	-
chr11	3224626	3225111	3224945		46	409.3	57.76	0	27		15098	3239174	3240043	MRGPRG	-
chr11	3663227	3663672	3663435		23	87.02	11.74	0.37	12		50	3660046	3663485	ART5	-
chr11	3818531	3818990	3818775		30	203.72	38.73	0.03	22		2	3723645	3818777	NUP98	-
chr11	3876741	3877167	3876935		39	311.57	41.35	0	22		3	3876932	4114439	STIM1	+
chr11	4208522	4209212	4208915		46	305.78	31.69	0	18		-45603	4254518	4255102	AC018793.5	+
chr11	6255767	6256135	6255895		37	299.82	42.23	0	25		46	6232565	6255941	FAM160A2	-
chr11	6411354	6412062	6411725		38	196.16	14.67	0.03	10		70	6411655	6416225	SMPD1	+
chr11	6494896	6495548	6495115		51	398.07	65.46	0	29		99	6471535	6495214	TRIM3	-
chr11	6624828	6625138	6625005		18	74.27	11.86	0.57	12		41	6624964	6632097	ILK	+
chr11	7273049	7273642	7273410		48	400.11	35.21	0	15		229	7273181	7335427	SYT9	+
chr11	7534981	7535395	7535205		19	125.62	28.61	0.15	13		204	7535001	7674989	PPFIBP2	+
chr11	8102482	8103066	8102855		71	701.72	77.03	0	34		-54	8102909	8127652	TUB	+
chr11	8284107	8285029	8284590		67	335.96	17.61	0	16		816	8248473	8285406	LMO1	-
chr11	8615711	8615914	8615810		14	69.21	10.78	0.81	11		26	8496340	8615836	STK33	-
chr11	8710347	8710647	8710435		14	98.08	22.01	0.25	10		6440	8703995	8711402	RPL27A	+
chr11	8891930	8892829	8892600		49	256.33	20.6	0	13		-31698	8714902	8860902	ST5	-
chr11	8932546	8933102	8932665		46	278.9	24.52	0	18		-137	8932802	8941626	C11orf17	+
chr11	8985417	8986196	8985595		45	166.65	15.65	0.06	16		407	8968841	8986002	TMEM9B	-
chr11	9286511	9287142	9286885		51	458.04	49.19	0	19		-14	9160381	9286871	DENND5A	-
chr11	9385675	9386480	9386125		91	950.28	74.28	0	27		-20044	9406169	9469673	IPO7	+
chr11	9482883	9483184	9483005		21	129.62	18.61	0.13	14		-190	9483195	9495533	ZNF143	+
chr11	9594583	9595681	9595355		137	1258.86	81.27	0	42		-75	9595430	9611531	WEE1	+
chr11	9635593	9635981	9635785		41	424.38	48.02	0	18		39551	9596234	9611311	WEE1	+
chr11	9779662	9780546	9779825		89	878.15	53.06	0	19		94197	9685628	9774508	SWAP70	+
chr11	9781289	9781623	9781435		19	161.65	30.72	0.06	11		95807	9685628	9774508	SWAP70	+
chr11	10315229	10316116	10315880		80	575.63	34.4	0	21		-126	9800216	10315754	SBF2	-
chr11	10326831	10327273	10327070		32	278.39	53.06	0	19		427	10326643	10328942	ADM	+
chr11	10328863	10329326	10329075		31	260.07	50.27	0	18		2432	10326643	10328942	ADM	+
chr11	10329496	10329978	10329745		38	248.41	39.69	0	29		3102	10326643	10328942	ADM	+
chr11	10562641	10562974	10562765		23	148.56	17.61	0.07	11		-54	10562819	10621478	AC009532.1	+
chr11	10952273	10953208	10952720		87	601.93	26.41	0	17		-73100	10874254	10879620	ZBED5	-
chr11	11484877	11485226	11485055		17	135.44	33.51	0.12	12		158506	11292421	11643561	GALNTL4	-
chr11	11642233	11642915	11642645		62	588.67	64.23	0	22		916	11292421	11643561	GALNTL4	-
chr11	11643387	11643865	11643525		57	509.87	36.97	0	21		36	11292421	11643561	GALNTL4	-
chr11	11863301	11863861	11863575		51	499.91	80.98	0	29		605	11862970	11980872	USP47	+
chr11	12131804	12132435	12131990		72	732.62	62.88	0	24		-148	12132138	12285327	MICAL2	+
chr11	12398980	12399695	12399575		51	340.24	24.65	0	14		429	12399146	12551410	PARVA	+
chr11	12695582	12696988	12696605		121	945.72	36.01	0	17		636	12695969	12966298	TEAD1	+
chr11	12768228	12768632	12768440		37	332.5	41.82	0	18		1852	12766588	12965490	TEAD1	+
chr11	13299304	13299706	13299515		21	167.71	33.01	0.06	11		83	13299432	13380105	ARNTL	+
chr11	13689592	13690049	13689850		48	407.48	45.78	0	25		-356	13690206	13753891	FAR1	+
chr11	13690108	13690439	13690245		20	111.26	16.07	0.16	10		-19	13690264	13735363	FAR1	+
chr11	14135065	14135167	14135125		11	201.35	30.72	0.03	11		150673	13984452	14287233	SPON1	+
chr11	14379765	14380946	14380165		122	831.84	24.71	0	19		-134	14299466	14380031	RRAS2	-
chr11	14402578	14403069	14402965		32	242.82	25.99	0	12		-22236	14299466	14380729	RRAS2	-
chr11	14444023	14444280	14444130		15	54.23	8.33	1.93	11		-63401	14299466	14380729	RRAS2	-
chr11	14664960	14665715	14665275		76	751.41	89.36	0	32		6	14665269	14793587	PDE3B	+
chr11	14665719	14666463	14666230		55	410.13	52.47	0	24		961	14665269	14793587	PDE3B	+
chr11	14912982	14913410	14913185		20	152.53	33.51	0.07	12		566	14899566	14913751	CYP2R1	-
chr11	15671744	15671992	15671875		18	137.45	22.89	0.12	12		462105	15209770	15268752	INSC	+
chr11	16107891	16108189	16108095		20	178.16	39.48	0.05	15		316318	15987995	16424413	SOX6	-
chr11	16625941	16626296	16626085		18	127.33	26.41	0.14	12		-128167	15991795	16497918	SOX6	-
chr11	16626458	16627023	16626795		64	665.92	64.23	0	22		-128877	15991795	16497918	SOX6	-
chr11	16947021	16947574	16947235		41	237.06	16.35	0.02	13		88724	16809215	17035959	PLEKHA7	-
chr11	17035847	17036386	17036095		39	329.91	42.68	0	16		-136	16809215	17035959	PLEKHA7	-
chr11	17374852	17375495	17375295		52	398.73	39.69	0	20		1986	17373309	17398867	AC124798.1	+
chr11	17410537	17410893	17410725		20	120.34	23.57	0.16	14		-519	17406798	17410206	KCNJ11	-
chr11	17497877	17498661	17498055		35	225.14	27.93	0.03	10		394	17414432	17498449	ABCC8	-
chr11	17568737	17569105	17568895		15	54.23	11.91	1.93	10		-25	17568920	17667491	OTOG	+
chr11	17756058	17756992	17756365		68	366.9	22.64	0	17		-1130	17757495	17804602	KCNC1	+
chr11	18034263	18035303	18034655		117	1108.54	64.15	0	27		54	17809599	18034709	SERGEF	-
chr11	18067661	18068065	18067810		24	192.79	35.21	0.04	13		-5501	18042538	18062309	TPH1	-
chr11	18415733	18416456	18415995		156	1742.05	82.75	0	46		-113	18416108	18418772	LDHA	+
chr11	18417380	18417873	18417615		25	157.85	19.56	0.06	10		-312	18417927	18425357	LDHA	+
chr11	18433713	18433912	18433825		12	54.21	8.8	1.91	10		-28	18433853	18472792	LDHC	+
chr11	18720011	18720460	18720235		26	136.63	15.85	0.12	12		-116	18720351	18726332	TMEM86A	+
chr11	19138559	19138971	19138730		26	128.22	15.75	0.14	13		38	19138692	19197966	ZDHHC13	+
chr11	19262351	19263178	19262945		47	240.02	17.61	0	12		-438	19245618	19262507	E2F8	-
chr11	19733890	19734742	19734385		107	988.36	80.72	0	42		-496	19734881	20143144	NAV2	+
chr11	20409009	20409722	20409135		48	147.15	9.78	0.09	14		59	20409076	20530873	PRMT3	+
chr11	20777362	20777456	20777375		10	201.35	27.93	0.03	10		86258	20691117	21597227	NELL1	+
chr11	22214307	22214829	22214425		38	342.34	39.1	0	14		-297	22214722	22304913	ANO5	+
chr11	24518328	24518738	24518510		20	88.73	15.68	0.35	12		-46	24518556	24808241	LUZP2	+
chr11	26353547	26353957	26353675		23	190.17	30.72	0.04	11		704	26352971	26684835	ANO3	+
chr11	27255704	27255912	27255765		12	88.13	18.4	0.35	10		129030	27360061	27384795	CCDC34	-
chr11	27493359	27494291	27494080		53	255.84	15.06	0	10		-219	27398705	27493861	LGR4	-
chr11	27740642	27740918	27740845		12	88.13	24.39	0.35	10		1481	27676440	27742326	BDNF	-
chr11	29761130	29761363	29761185		14	109.09	26.78	0.17	13		277303	30031765	30038488	KCNA4	-
chr11	30605846	30606288	30606065		25	125.03	13.83	0.15	11		1865	30406040	30607930	MPPED2	-
chr11	31531376	31531594	31531460		13	119.36	27.93	0.17	10		135	31531325	31805323	ELP4	+
chr11	31831578	31832339	31831730		45	362.37	27.93	0	10		955	31824277	31832685	PAX6	-
chr11	31831578	31832339	31832055		45	362.37	27.93	0	10		630	31824277	31832685	PAX6	-
chr11	31832479	31833252	31832705		50	406.78	55.85	0	20		80	31821796	31832785	PAX6	-
chr11	31834298	31834621	31834475		18	152.59	39.1	0.07	14		-1690	31821796	31832785	PAX6	-
chr11	31837555	31838013	31837635		24	179.48	33.51	0.04	12		1850	31811378	31839485	PAX6	-
chr11	32112268	32113225	32112650		70	600.57	55.85	0	18		173	32112477	32127271	RCN1	+
chr11	32456232	32456953	32456805		33	151.62	16.61	0.07	10		86	32409330	32456891	WT1	-
chr11	32851090	32851949	32851350		69	448.05	37.85	0	24		-139	32851489	32876103	PRRG4	+
chr11	32913980	32915172	32914485		123	999.93	47.54	0	28		-307	32914792	33001816	QSER1	+
chr11	33037014	33037986	33037695		93	911.13	61.44	0	22		285	33037410	33047704	DEPDC7	+
chr11	33060941	33061647	33061215		63	453.9	31.12	0	20		-346	33061561	33095109	TCP11L1	+
chr11	33278608	33280289	33278895		280	3198.53	111.05	0	45		-238	33279133	33378569	HIPK3	+
chr11	33278608	33280289	33280085		280	3198.53	111.05	0	45		952	33279133	33378569	HIPK3	+
chr11	33890980	33891409	33891335		29	199.52	24.61	0.03	12		-253	33880122	33891082	LMO2	-
chr11	34073510	34074117	34073790		62	620.67	64.02	0	23		560	34073230	34120607	CAPRIN1	+
chr11	34195940	34196228	34196105		17	67.35	9.33	0.92	11		68994	34127111	34168457	NAT10	+
chr11	34378416	34379234	34378655		126	953.78	51.5	0	50		147	34172535	34378802	ABTB2	-
chr11	34379273	34379871	34379505		75	810.58	108.91	0	39		76	34378248	34379581	ABTB2	-
chr11	34380474	34380756	34380675		18	102.38	13.7	0.21	11		-1094	34378248	34379581	ABTB2	-
chr11	35440677	35441109	35440915		35	276.66	30.49	0	16		658	35327740	35441573	SLC1A2	-
chr11	35639876	35641618	35640855		318	3100	126.59	0	65		1120	35639735	35642419	FJX1	+
chr11	35684137	35684870	35684375		44	250.52	24.23	0	15		22	35684353	35830930	TRIM44	+
chr11	35965269	35966264	35965625		147	988.95	42.96	0	49		-3	35965628	36253686	LDLRAD3	+
chr11	43333448	43333674	43333595		11	94.08	27.93	0.28	10		90	43333505	43357870	API5	+
chr11	43569457	43569862	43569715		19	146.16	30.72	0.09	11		56217	43513498	43515493	TTC17	+
chr11	43963849	43964921	43964195		65	344.1	22.01	0	15		17303	43946892	43964823	AC087521.4	+
chr11	44087414	44087940	44087720		32	190.19	26.29	0.04	16		-9	44087729	44105569	ACCS	+
chr11	44330927	44331828	44331660		71	531.95	43.67	0	22		-41	44281994	44331619	ALX4	-
chr11	44587127	44587297	44587230		11	95.42	24.21	0.26	10		89	44587141	44641313	CD82	+
chr11	44748308	44748919	44748520		77	549.51	48.42	0	43		-133355	44881875	44952517	TSPAN18	+
chr11	44972084	44972696	44972470		51	429.92	39.61	0	17		-203	44956129	44972267	TP53I11	-
chr11	45201696	45202800	45201890		94	781.74	59.42	0	26		-1419	45203309	45246903	PRDM11	+
chr11	45686900	45687532	45687145		48	435.14	50.27	0	18		27	45670427	45687172	CHST1	-
chr11	45825493	45826048	45825930		58	510.29	63.47	0	31		307	45825623	45834561	SLC35C1	+
chr11	45868578	45869337	45868785		63	410.28	33.75	0	23		-172	45868957	45904798	CRY2	+
chr11	45907175	45907515	45907265		27	155.27	19.81	0.07	18		63	45907202	45928016	MAPK8IP1	+
chr11	45918045	45918392	45918185		38	311.57	47.49	0	31		13	45918172	45928016	MAPK8IP1	+
chr11	45944089	45944916	45944235		55	351.01	35.21	0	19		-94	45944329	45950647	GYLTL1B	+
chr11	46142901	46143220	46143015		15	119.44	27.93	0.17	10		-30	45950871	46142985	PHF21A	-
chr11	46143353	46143798	46143585		27	228.66	44.68	0.03	16		-600	45950871	46142985	PHF21A	-
chr11	46259216	46260029	46259865		109	1054.95	60.64	0	31		-39363	46299228	46342970	CREB3L1	+
chr11	46316960	46317328	46317115		15	77.13	16.24	0.51	10		17887	46299228	46342970	CREB3L1	+
chr11	46368745	46369345	46368980		69	301.98	15.87	0	25		24	46368956	46400224	DGKZ	+
chr11	46382870	46383190	46382985		21	120.34	26.85	0.16	19		-160	46383145	46402104	DGKZ	+
chr11	46402534	46403143	46402945		32	190.19	17.9	0.04	10		327	46402618	46405372	MDK	+
chr11	46403191	46403651	46403305		26	144.82	21.13	0.11	12		2	46403303	46405372	MDK	+
chr11	46411030	46411681	46411485		35	170.88	14.35	0.06	10		-3327	46406648	46408158	CHRM4	-
chr11	46413089	46413790	46413325		41	223.83	17.61	0.03	12		-5167	46406648	46408158	CHRM4	-
chr11	46848271	46848582	46848435		17	138.29	28.48	0.12	10		19408	46765086	46867843	CKAP5	-
chr11	46939709	46940488	46940155		84	558.22	38.91	0	34		18	46878419	46940173	LRP4	-
chr11	47207160	47208286	47207950		87	667.06	55.02	0	24		8	47199083	47207958	PACSIN3	-
chr11	47291055	47291898	47291725		90	671.81	33.75	0	22		54	47291671	47351582	MADD	+
chr11	47429656	47430492	47429855		113	1251.27	89.36	0	32		-196	47430051	47438044	SLC39A13	+
chr11	47574600	47574952	47574805		40	223.01	20.2	0.03	26		-117	47489946	47574688	CELF1	-
chr11	47586827	47587446	47587115		59	508.19	55.83	0	25		-14	47587129	47593366	PTPMT1	+
chr11	47615617	47615999	47615805		14	61.73	14.67	1.31	10		156	47611216	47615961	C1QTNF4	-
chr11	47663668	47664331	47664120		126	1344.51	132.05	0	72		86	47638858	47664206	MTCH2	-
chr11	47788407	47789050	47788870		42	288.52	34.01	0	17		123	47738070	47788993	FNBP4	-
chr11	48001688	48002587	48002145		153	1855.05	122.87	0	44		35	48002110	48192393	PTPRJ	+
chr11	49455812	49456264	49456125		37	352.25	41.89	0	15		-18820	49426643	49437305	AC135977.2	-
chr11	49501855	49502072	49501910		14	109.09	23.03	0.17	12		-64605	49426643	49437305	AC135977.2	-
chr11	57078762	57079134	57078955		27	189.05	26.27	0.04	15		-8597	57067103	57070358	TNKS1BP1	-
chr11	57091970	57092587	57092370		34	205.69	34.8	0.03	15		43	57067272	57092413	TNKS1BP1	-
chr11	57250486	57250747	57250680		15	54.23	9.23	1.93	12		22363	57228317	57236103	RTN4RL2	+
chr11	57266852	57267222	57267055		19	103.17	17.61	0.21	12		16104	57252010	57283159	SLC43A1	-
chr11	57435095	57436074	57435580		108	1104.41	97.74	0	34		212	57435368	57468659	ZDHHC5	+
chr11	58346519	58347332	58346710		38	238.41	23.89	0	10		65	58346645	58392039	ZFP91	+
chr11	58939492	58939910	58939655		26	195.02	32.21	0.03	14		-157	58939812	58976060	DTX4	+
chr11	59317790	59318105	59317945		27	266.59	41.27	0	15		35559	59282386	59283330	OR4D9	+
chr11	59436235	59436719	59436545		49	469.91	71.38	0	30		-34	59404194	59436511	PATL1	-
chr11	59522645	59523100	59522895		31	231.79	40.14	0.02	20		363	59522532	59570176	STX3	+
chr11	60691794	60692291	60692065		46	367.29	28.17	0	16		119	60691946	60704628	TMEM132A	+
chr11	60928447	60929251	60928865		49	398.79	39.1	0	14		51	60897730	60928916	VPS37C	-
chr11	61061593	61061963	61061730		23	55.79	6.53	1.78	11		1058	61026147	61062788	VWCE	-
chr11	61276404	61277234	61276925		116	1063.45	59.86	0	33		653	61276272	61278482	LRRC10B	+
chr11	61347971	61349157	61348565		210	2477.45	160.97	0	64		-267	61282793	61348298	SYT7	-
chr11	61486077	61486377	61486265		23	202.34	37.07	0.03	16		-33856	61520121	61555989	C11orf9	+
chr11	61519833	61520278	61520005		34	209.12	17.01	0.03	13		-116	61520121	61555989	C11orf9	+
chr11	61583835	61584671	61584385		92	795.42	46.05	0	25		636	61583749	61634825	FADS2	+
chr11	61594941	61595259	61595115		20	61.74	8.42	1.31	12		-598	61595713	61634825	FADS2	+
chr11	61595584	61595982	61595795		22	181.4	39.1	0.04	14		82	61595713	61634825	FADS2	+
chr11	61658537	61659604	61658985		129	1131.76	58.1	0	33		21	61640999	61659006	FADS3	-
chr11	61684663	61685281	61685085		104	1170.38	74.49	0	32		-88	61664774	61684997	RAB3IL1	-
chr11	62313509	62314509	62314245		54	225.71	21.38	0.03	17		87	62283374	62314332	AHNAK	-
chr11	62369687	62370525	62370115		101	678.97	27.43	0	26		-812	62360675	62369303	MTA2	-
chr11	62389051	62389763	62389565		54	372.8	42.26	0	24		-117	62382769	62389448	B3GAT3	-
chr11	62494172	62495206	62494735		155	994.28	44.02	0	53		86	62482222	62494821	HNRNPUL2	-
chr11	62553867	62554628	62554085		41	161.84	12.3	0.06	11		-789	62554874	62557871	TMEM179B	+
chr11	62554672	62555138	62554925		24	80.95	9.68	0.45	11		51	62554874	62557871	TMEM179B	+
chr11	62609037	62609318	62609130		40	121.62	8.07	0.16	26		-1997	62600384	62607133	WDR74	-
chr11	62623383	62623880	62623635		31	146.41	17.54	0.09	15		61	62623574	62656265	SLC3A2	+
chr11	62648631	62649043	62648875		32	238.59	26.41	0	15		379	62648496	62656330	SLC3A2	+
chr11	63381690	63382150	63382025		35	276.74	46.22	0	20		-116	63341946	63381909	PLA2G16	-
chr11	63438801	63439535	63439065		62	334.15	22.65	0	20		122	63391560	63439187	ATL3	-
chr11	63448651	63449273	63448885		40	214.05	16.45	0.03	12		-105	63448990	63526544	RTN3	+
chr11	63535814	63536816	63536215		62	211.45	22.89	0.03	24		-102	63527364	63536113	C11orf95	-
chr11	63580425	63581526	63580850		87	714.28	54.72	0	22		-10	63580860	63595151	C11orf84	+
chr11	63606495	63606985	63606675		47	420.66	53.68	0	24		-92	63606767	63677045	MARK2	+
chr11	63684278	63685136	63684595		176	1788.98	108.57	0	74		-279	63678693	63684316	RCOR2	-
chr11	63685254	63685972	63685525		91	594.19	44.99	0	46		-1209	63678693	63684316	RCOR2	-
chr11	63705984	63706615	63706165		132	1273.62	72.94	0	57		-277	63706442	63724444	NAA40	+
chr11	63774512	63774892	63774685		21	144.73	26.01	0.11	13		20764	63753921	63765173	OTUB1	+
chr11	63803035	63803558	63803300		51	514.67	55.85	0	20		49379	63753921	63765173	OTUB1	+
chr11	63828332	63828529	63828455		17	130.11	22.01	0.13	15		-42907	63871362	63886645	FLRT1	+
chr11	63933050	63934106	63933390		113	623.94	26.41	0	29		195	63766031	63933585	MACROD1	-
chr11	64001643	64002738	64002355		111	965.63	45.04	0	22		89	64002266	64006258	VEGFB	+
chr11	64013913	64015125	64014165		96	450.71	21.36	0	22		248	64011953	64014413	PPP1R14B	-
chr11	64015151	64015396	64015240		18	103.95	17.61	0.2	12		-827	64011953	64014413	PPP1R14B	-
chr11	64018830	64019240	64019075		27	135.62	18.71	0.12	16		33	64019042	64035394	PLCB3	+
chr11	64059152	64059787	64059405		34	82.11	7.7	0.44	11		513	64058892	64066912	KCNK4	+
chr11	64072509	64073539	64073125		71	534.49	33.01	0	15		81	64073044	64084210	ESRRA	+
chr11	64073707	64073982	64073885		22	129.62	15.79	0.13	13		-33	64073918	64074980	ESRRA	+
chr11	64085428	64086000	64085605		48	256.33	24.21	0	23		36	64085569	64089282	PRDX5	+
chr11	64109800	64110247	64110085		52	486.5	57.19	0	29		-118	64110203	64118167	CCDC88B	+
chr11	64126160	64126865	64126535		63	387.53	27.35	0	22		-90	64126625	64139686	RPS6KA4	+
chr11	64410955	64411314	64411175		29	249.87	52.82	0	24		-217	64397958	64410958	NRXN2	-
chr11	64480557	64481282	64481020		68	509.33	36.75	0	22		-451	64435954	64480569	NRXN2	-
chr11	64545058	64545786	64545400		73	641.53	73	0	34		109	64543518	64545509	SF1	-
chr11	64570321	64570973	64570640		59	405	30.81	0	21		7	64566893	64570647	MAP4K2	-
chr11	64611680	64612281	64612065		59	400.15	29.15	0	23		10502	64621764	64622567	EHD1	-
chr11	64645452	64646607	64646045		56	187.39	14.31	0.04	13		-32	64627098	64646013	EHD1	-
chr11	64692037	64692453	64692215		27	189.05	33.04	0.04	18		35	64692180	64701947	PPP2R5B	+
chr11	64794799	64795163	64794955		14	56.17	12.58	1.76	10		45	64794910	64808040	SNX15	+
chr11	64808415	64809384	64809015		131	1332.16	63.82	0	30		389	64808626	64812199	SAC3D1	+
chr11	65029208	65029413	65029295		15	107.33	22.89	0.18	13		-135	65029430	65065087	POLA2	+
chr11	65082013	65082527	65082180		32	180.92	21.16	0.04	14		-151	65082331	65089899	CDC42EP2	+
chr11	65121967	65122479	65122265		28	153.91	16.56	0.07	11		-17	65122282	65125078	TIGD3	+
chr11	65122491	65122850	65122635		22	110.34	16.35	0.16	13		353	65122282	65125078	TIGD3	+
chr11	65149143	65150405	65149895		85	471.51	38.15	0	26		247	65143665	65150142	SLC25A45	-
chr11	65153925	65154269	65154120		16	83.14	16.14	0.4	11		79	65154041	65180990	FRMD8	+
chr11	65189411	65190065	65189745		55	377.3	36.16	0	23		-32908	65222653	65223178	AP000769.1	+
chr11	65239602	65239943	65239725		16	95.34	19.37	0.26	11		17072	65222653	65223178	AP000769.1	+
chr11	65264750	65265388	65265125		98	781.1	39.38	0	34		-27423	65292548	65306182	SCYL1	+
chr11	65307339	65308520	65308155		92	478.51	18.71	0	17		15571	65292584	65306172	SCYL1	+
chr11	65325509	65326231	65325825		68	579.88	59.37	0	28		-126	65306290	65325699	LTBP3	-
chr11	65339970	65340577	65340065		79	733.28	50.3	0	28		-76	65340141	65341633	FAM89B	+
chr11	65341532	65342022	65341845		28	183.18	28.1	0.04	15		1704	65340141	65341633	FAM89B	+
chr11	65430099	65430804	65430460		74	510.81	29.83	0	24		-17	65421070	65430443	RELA	-
chr11	65547522	65547954	65547645		31	146.41	13.34	0.09	14		-6884	65554529	65564683	OVOL1	+
chr11	65548049	65549047	65548360		78	543.28	33.45	0	17		-6169	65554529	65564683	OVOL1	+
chr11	65624754	65625009	65624860		14	106.2	21.47	0.2	10		944	65622308	65625804	CFL1	-
chr11	65625153	65625629	65625400		31	159.22	18.86	0.06	15		404	65622308	65625804	CFL1	-
chr11	65655372	65655758	65655610		23	111.89	14.76	0.16	13		331	65655293	65655941	FIBP	-
chr11	65657852	65658805	65658130		253	2193.04	88.03	0	109		255	65657875	65659105	CCDC85B	+
chr11	65667623	65668255	65667995		37	165.12	16.72	0.06	14		2	65660060	65667997	FOSL1	-
chr11	65686273	65687153	65686505		65	321.94	19.81	0	17		-223	65686728	65689031	DRAP1	+
chr11	65819221	65819960	65819730		56	355.76	29.34	0	18		-86	65819816	65836382	SF3B2	+
chr11	65837498	65838273	65837795		98	871.43	80.27	0	47		-29	65837824	66012213	PACS1	+
chr11	66034886	66035290	66035210		28	204.47	22.52	0.03	10		-846	66036056	66044963	RAB1B	+
chr11	66059180	66059487	66059360		21	74.15	8.81	0.57	13		19	66059341	66064131	TMEM151A	+
chr11	66079656	66079932	66079745		13	98.46	24.39	0.24	10		4770	66081958	66084515	CD248	-
chr11	66080374	66080692	66080485		27	267.23	55.85	0	20		4030	66081958	66084515	CD248	-
chr11	66114462	66115549	66115260		84	383.88	20.11	0	20		-99	66112846	66115161	AP001107.2	-
chr11	66138728	66139759	66139045		68	271.32	17.61	0	17		246	66129993	66139291	SLC29A2	-
chr11	66234293	66235059	66234760		58	488.22	41.57	0	16		424	66234336	66244805	PELI3	+
chr11	66247459	66247910	66247705		27	175.61	26.41	0.05	15		-175	66247880	66277130	DPP3	+
chr11	66313122	66313881	66313645		45	318.86	28.61	0	13		26	66306735	66313671	ZDHHC24	-
chr11	66360485	66360754	66360575		12	68.08	21.05	0.88	10		-21	66357640	66360554	CCDC87	-
chr11	66383492	66384074	66383875		26	158.19	30.12	0.06	12		-178	66384053	66394818	RBM14	+
chr11	66494859	66496272	66495745		108	578.1	40.24	0	31		-6875	66452721	66488870	SPTBN2	-
chr11	66511969	66512456	66512195		38	283.47	32.34	0	17		-12	66512207	66610799	C11orf80	+
chr11	66623535	66624764	66623765		122	871.09	35.21	0	23		-824	66624589	66627946	LRFN4	+
chr11	66623535	66624764	66624315		122	871.09	35.21	0	23		-274	66624589	66627946	LRFN4	+
chr11	66725439	66726416	66725625		109	961.46	42.1	0	22		222	66627889	66725847	PC	-
chr11	66725439	66726416	66726165		109	961.46	42.1	0	22		-318	66627889	66725847	PC	-
chr11	66790564	66791364	66790840		71	400.08	24.21	0	22		-51	66790891	66818329	SYT12	+
chr11	66885157	66886088	66885925		63	291.88	17.61	0	16		-1573	66887498	67025141	KDM2A	+
chr11	66886287	66886943	66886555		118	1267.32	104.04	0	52		-943	66887498	67025141	KDM2A	+
chr11	66886287	66886943	66886555		118	1267.32	104.04	0	52		-943	66887498	67025141	KDM2A	+
chr11	67033649	67034369	67033890		75	603.62	43.19	0	24		-15	67033905	67054029	ADRBK1	+
chr11	67055922	67057073	67056835		93	586.21	26.08	0	18		64	67056771	67059122	ANKRD13D	+
chr11	67140177	67140997	67140545		43	274.13	33.01	0	15		661	67131643	67141206	CLCF1	-
chr11	67159074	67159428	67159285		20	67.85	10.94	0.9	14		-138	67159423	67165861	RAD9A	+
chr11	67168770	67169372	67169300		40	304.32	24.21	0	11		76	67165652	67169376	PPP1CA	-
chr11	67187926	67188860	67188525		207	1974.58	58.79	0	50		80	67165654	67188605	PPP1CA	-
chr11	67210849	67211339	67211185		44	346.74	36.97	0	21		-202	67205519	67210983	CORO1B	-
chr11	67236567	67237025	67236685		42	255.42	29.71	0	26		58	67232566	67236743	TMEM134	-
chr11	67271620	67272124	67271865		38	223.56	20.12	0.03	16		978	67259240	67272843	PITPNM1	-
chr11	67272656	67272986	67272815		24	158.57	21.85	0.06	14		28	67259240	67272843	PITPNM1	-
chr11	67275515	67275836	67275630		18	134.88	24.21	0.12	11		472	67273969	67276102	CDK2AP2	-
chr11	67350921	67351539	67351185		58	468.29	34.51	0	19		-28	67351213	67354121	GSTP1	+
chr11	67350921	67351539	67351345		58	468.29	34.51	0	19		132	67351213	67354121	GSTP1	+
chr11	67396908	67397585	67397320		67	577.49	41.78	0	20		72	67395410	67397392	NUDT8	-
chr11	67723033	67723553	67723395		26	108.33	11.47	0.17	11		48198	67758575	67771593	UNC93B1	-
chr11	67771224	67771771	67771595		50	379.26	31.07	0	18		-2	67758575	67771593	UNC93B1	-
chr11	67777566	67778026	67777795		27	173.46	22.89	0.05	12		-6202	67758575	67771593	UNC93B1	-
chr11	67806436	67806740	67806525		14	94.45	23.06	0.29	11		42	67806483	67818365	TCIRG1	+
chr11	67888220	67889281	67888855		199	2486.65	195.48	0	69		3	67820350	67888858	CHKA	-
chr11	67980274	67980592	67980355		22	188.59	41.27	0.04	13		-134	67947622	67980221	SUV420H1	-
chr11	67980758	67981358	67981065		38	296.3	39.1	0	14		-3	67933186	67981062	SUV420H1	-
chr11	68039311	68039715	68039465		26	108.33	13.37	0.17	15		4	68028807	68039469	C11orf24	-
chr11	68079735	68080838	68080155		114	747.43	35.23	0	29		47	68080108	68216739	LRP5	+
chr11	68451828	68452374	68451975		58	478.33	47.54	0	27		-8	68451983	68458643	GAL	+
chr11	68518624	68519117	68518935		61	607.68	84.8	0	37		53	68514616	68518988	MTL5	-
chr11	68564234	68564590	68564460		19	119.98	21.13	0.16	12		44939	68522355	68609399	CPT1A	-
chr11	68606608	68607182	68606915		35	179.29	13.92	0.04	11		2484	68522355	68609399	CPT1A	-
chr11	68608204	68608751	68608365		49	346.71	24.94	0	17		1034	68522355	68609399	CPT1A	-
chr11	68608820	68609722	68609385		116	1144.25	96.84	0	44		14	68522355	68609399	CPT1A	-
chr11	69455575	69456191	69455985		32	180.92	30.78	0.04	16		112	69455873	69469241	CCND1	+
chr11	69457854	69458314	69458175		44	384.28	42.61	0	21		2302	69455873	69469241	CCND1	+
chr11	69515332	69515742	69515525		16	85.31	18.09	0.38	10		3581	69513007	69519106	FGF19	-
chr11	69519346	69519760	69519550		20	135.5	33.01	0.12	14		-444	69513007	69519106	FGF19	-
chr11	69632623	69632939	69632755		23	215.56	33.49	0.03	12		1437	69624736	69634192	FGF3	-
chr11	69633396	69633779	69633625		24	208.8	25.13	0.03	10		567	69624736	69634192	FGF3	-
chr11	69924371	69924783	69924535		26	108.33	10.91	0.17	12		-129	69924664	70035633	ANO1	+
chr11	70107629	70107732	70107685		14	165.57	12.82	0.06	14		-9138	70116823	70230500	PPFIA1	+
chr11	70116654	70116950	70116795		15	84	16.14	0.39	10		-28	70116823	70230500	PPFIA1	+
chr11	70244121	70244663	70244435		52	398.73	35.05	0	22		-75	70244510	70282690	CTTN	+
chr11	71934243	71935313	71934855		83	553.49	47.54	0	26		-970	71935825	71950149	INPPL1	+
chr11	72353262	72353694	72353465		30	210.14	36.21	0.03	19		710	72307636	72354175	PDE2A	-
chr11	72353919	72354429	72354085		25	128.22	14.99	0.14	10		90	72307636	72354175	PDE2A	-
chr11	72524860	72525930	72525495		75	355.31	19.81	0	17		44	72525451	72540678	ATG16L2	+
chr11	72532922	72533865	72533175		105	976.52	68.71	0	31		7711	72525464	72537778	ATG16L2	+
chr11	72852558	72854037	72853815		148	1406.32	67.75	0	25		-672	72547812	72853143	FCHSD2	-
chr11	72928994	72929757	72929215		75	466.88	34.75	0	31		-129	72929344	72947393	P2RY2	+
chr11	73018783	73020193	73019855		141	1180.96	93.16	0	45		192	73019663	73080424	ARHGEF17	+
chr11	73087119	73088509	73087365		126	646.07	24.49	0	26		-348	73087713	73108518	RELT	+
chr11	73308965	73309401	73309270		36	157.45	13.85	0.06	17		-42	73117029	73309228	FAM168A	-
chr11	73471697	73472438	73472200		63	516.15	43.55	0	20		-34	73386939	73472166	RAB6A	-
chr11	73587625	73588100	73587805		31	168.15	20.12	0.06	16		85	73583715	73587890	CHCHD8	-
chr11	73693677	73694106	73693785		84	915.51	82.75	0	46		104	73685716	73693889	UCP2	-
chr11	73694231	73694813	73694365		62	568.64	48.21	0	23		-476	73685716	73693889	UCP2	-
chr11	74204016	74204857	74204375		168	1461.78	61.42	0	58		380	74202923	74204755	LIPT2	-
chr11	74460104	74460566	74460355		38	323.77	48.42	0	22		442	74459913	74553457	RNF169	+
chr11	74699724	74700002	74699830		17	142.58	29.47	0.12	12		651	74699179	74718741	NEU3	+
chr11	74951901	74953247	74952855		225	2083.58	54.84	0	36		289	74952566	74953243	AP001972.1	+
chr11	75061944	75063278	75062885		129	746.01	36.33	0	34		-12	74976482	75062873	ARRB1	-
chr11	75140814	75141764	75141330		80	496.84	26.51	0	18		-97	75133440	75141233	KLHL35	-
chr11	75236534	75237125	75237045		33	158.17	13.83	0.06	11		-178	75166367	75236867	GDPD5	-
chr11	75378416	75378885	75378715		26	202.85	28.48	0.03	10		764	75313906	75379479	MAP6	-
chr11	75379003	75379405	75379250		24	196.21	33.66	0.03	12		229	75313906	75379479	MAP6	-
chr11	75479478	75480076	75479835		63	481.38	48.42	0	30		57	75479778	75512579	DGAT2	+
chr11	75917077	75917768	75917525		102	1066.21	85.83	0	39		49	75897868	75917574	WNT11	-
[truncated: 8,561 more rows]
